# Supplementary material for: Annotating Transcriptional Effects of Genetic Variants in Disease‐Relevant Tissue: Transcriptome‐Wide Allelic Imbalance in Osteoarthritic Cartilage
Source: PubMed Central journal article supplement — Arthritis Rheumatol. 2019 Feb 23;71(4):561–70. doi: 10.1002/art.40748 (PMC6593438; doi:10.1002/art.40748), 2019-02-23
Supplement: ART-71-561-s002.pdf [file ART-71-561-s002.pdf]

**Supplementary Table S1: Individual sample characteristics**

| <b>RAAK_ID</b> | <b>Sample</b> | <b>AGE</b> | <b>SEX</b> | <b>JOINT</b> |
|----------------|---------------|------------|------------|--------------|
| 1              | OA            | 67         | F          | Hip          |
| 1              | P             | 67         | F          | Hip          |
| 2              | OA            | 61         | M          | Knee         |
| 2              | P             | 61         | M          | Knee         |
| 3              | OA            | 78         | F          | Knee         |
| 3              | P             | 78         | F          | Knee         |
| 4              | P             | 67         | F          | Hip          |
| 5              | P             | 79         | F          | Hip          |
| 6              | P             | 49         | F          | Knee         |
| 7              | P             | 69         | F          | Hip          |
| 8              | OA            | 46         | F          | Knee         |
| 9              | OA            | 59         | F          | Knee         |
| 9              | P             | 59         | F          | Knee         |
| 10             | P             | 62         | F          | Hip          |
| 11             | OA            | 75         | F          | Knee         |
| 11             | P             | 75         | F          | Knee         |
| 12             | P             | 67         | M          | Hip          |
| 13             | OA            | 53         | F          | Hip          |
| 14             | P             | 70         | F          | Knee         |
| 15             | OA            | 73         | F          | Knee         |
| 15             | P             | 73         | F          | Knee         |
| 16             | OA            | 72         | F          | Knee         |
| 17             | OA            | 69         | M          | Knee         |
| 17             | P             | 69         | M          | Knee         |
| 18             | P             | 80         | F          | Hip          |
| 19             | OA            | 77         | F          | Knee         |
| 20             | P             | NA         | F          | Knee         |
| 21             | P             | 66         | F          | Knee         |
| 22             | OA            | 56         | F          | Knee         |
| 22             | P             | 56         | F          | Knee         |
| 23             | P             | 62         | F          | Knee         |
| 24             | OA            | 77         | M          | Knee         |
| 24             | P             | 77         | M          | Knee         |
| 25             | OA            | 80         | M          | Hip          |
| 25             | P             | 80         | M          | Hip          |
| 26             | OA            | 79         | F          | Knee         |
| 26             | P             | 79         | F          | Knee         |
| 27             | OA            | 82         | F          | Hip          |
| 28             | OA            | 48         | F          | Hip          |
| 28             | P             | 48         | F          | Hip          |
| 29             | P             | 74         | F          | Knee         |
| 30             | OA            | 64         | F          | Hip          |
| 30             | P             | 64         | F          | Hip          |
| 31             | OA            | 78         | F          | Hip          |
| 31             | P             | 78         | F          | Hip          |
| 32             | OA            | 79         | F          | Knee         |

| RAAK_ID | Sample | AGE | SEX | JOINT |
|---------|--------|-----|-----|-------|
| 32      | P      | 79  | F   | Knee  |
| 33      | P      | 74  | F   | Hip   |
| 34      | P      | 69  | F   | Knee  |
| 35      | OA     | 64  | F   | Knee  |
| 35      | P      | 64  | F   | Knee  |
| 36      | OA     | 60  | F   | Hip   |
| 36      | P      | 60  | F   | Hip   |
| 37      | P      | 66  | M   | Hip   |
| 38      | P      | 67  | M   | Hip   |
| 39      | OA     | 76  | F   | Knee  |
| 39      | P      | 76  | F   | Knee  |
| 40      | P      | 60  | F   | Hip   |
| 41      | OA     | 67  | F   | Knee  |
| 41      | P      | 67  | F   | Knee  |
| 42      | OA     | 74  | F   | Knee  |
| 42      | P      | 74  | F   | Knee  |
| 43      | OA     | 76  | M   | Knee  |
| 43      | P      | 76  | M   | Knee  |
| 44      | P      | 55  | F   | Hip   |
| 45      | P      | 60  | M   | Hip   |
| 46      | P      | 61  | F   | Hip   |
| 47      | P      | 62  | F   | Hip   |
