# Supplementary material for: Annotating Transcriptional Effects of Genetic Variants in Disease‐Relevant Tissue: Transcriptome‐Wide Allelic Imbalance in Osteoarthritic Cartilage
Source: PubMed Central journal article supplement — Arthritis Rheumatol. 2019 Feb 23;71(4):561–70. doi: 10.1002/art.40748 (PMC6593438; doi:10.1002/art.40748), 2019-02-23
Supplement: ART-71-561-s005.pdf [file ART-71-561-s005.pdf]

**Supplementary Table S4:** Significantly (FDR < 0.05) differential gene expression between preserved and paired lesioned samples.

| ensembl         | gene     | logCPM | logFC  | FC     | PValue   | FDR      |
|-----------------|----------|--------|--------|--------|----------|----------|
| ENSG00000196352 | CD55     | 9.150  | 1.654  | 3.146  | 5.03E-24 | 5.26E-20 |
| ENSG00000106089 | STX1A    | 4.565  | 1.490  | 2.809  | 7.96E-20 | 4.17E-16 |
| ENSG00000090530 | P3H2     | 6.518  | 1.744  | 3.350  | 2.23E-19 | 7.77E-16 |
| ENSG00000125864 | BFSP1    | 4.569  | 1.161  | 2.236  | 2.17E-18 | 5.67E-15 |
| ENSG00000114737 | CISH     | 2.628  | -0.933 | 0.524  | 8.05E-18 | 1.68E-14 |
| ENSG00000134259 | NGF      | 3.923  | 2.515  | 5.717  | 2.11E-17 | 3.03E-14 |
| ENSG00000196104 | SPOCK3   | 3.307  | -2.846 | 0.139  | 2.26E-17 | 3.03E-14 |
| ENSG00000066382 | MPPED2   | 3.323  | -1.376 | 0.385  | 2.32E-17 | 3.03E-14 |
| ENSG00000196517 | SLC6A9   | 3.400  | 0.786  | 1.724  | 3.39E-17 | 3.61E-14 |
| ENSG00000100593 | ISM2     | 3.279  | 2.622  | 6.157  | 3.45E-17 | 3.61E-14 |
| ENSG00000187068 | C3orf70  | 3.779  | -1.195 | 0.437  | 1.64E-16 | 1.56E-13 |
| ENSG00000111245 | MYL2     | 2.908  | 4.403  | 21.150 | 5.97E-16 | 4.97E-13 |
| ENSG00000196878 | LAMB3    | 5.217  | 2.052  | 4.146  | 6.17E-16 | 4.97E-13 |
| ENSG00000183098 | GPC6     | 8.610  | -0.971 | 0.510  | 7.27E-16 | 5.43E-13 |
| ENSG00000145824 | CXCL14   | 5.843  | 2.238  | 4.719  | 1.61E-15 | 1.13E-12 |
| ENSG00000135636 | DYSF     | 5.788  | 1.312  | 2.483  | 2.03E-15 | 1.33E-12 |
| ENSG00000168528 | SERINC2  | 2.872  | 0.859  | 1.814  | 2.95E-15 | 1.81E-12 |
| ENSG00000196923 | PDLIM7   | 6.214  | 1.208  | 2.310  | 4.29E-15 | 2.50E-12 |
| ENSG00000171488 | LRRC8C   | 3.924  | 1.354  | 2.557  | 7.95E-15 | 4.38E-12 |
| ENSG00000178038 | ALS2CL   | 5.609  | 0.837  | 1.787  | 9.40E-15 | 4.92E-12 |
| ENSG00000147010 | SH3KBP1  | 4.805  | 0.838  | 1.788  | 1.13E-14 | 5.63E-12 |
| ENSG00000179399 | GPC5     | 3.829  | -1.990 | 0.252  | 1.46E-14 | 6.95E-12 |
| ENSG00000153714 | LURAP1L  | 2.809  | -0.784 | 0.581  | 2.19E-14 | 9.99E-12 |
| ENSG00000160447 | PKN3     | 5.824  | 0.752  | 1.684  | 2.60E-14 | 1.10E-11 |
| ENSG00000185432 | METTL7A  | 7.422  | -0.879 | 0.544  | 2.63E-14 | 1.10E-11 |
| ENSG00000000971 | CFH      | 11.420 | -1.424 | 0.373  | 3.03E-14 | 1.22E-11 |
| ENSG00000005884 | ITGA3    | 4.382  | 0.914  | 1.885  | 5.02E-14 | 1.95E-11 |
| ENSG00000173210 | ABLIM3   | 2.714  | 1.291  | 2.448  | 5.47E-14 | 2.04E-11 |
| ENSG00000198729 | PPP1R14C | 4.821  | 1.405  | 2.649  | 7.04E-14 | 2.54E-11 |
| ENSG00000150938 | CRIM1    | 7.474  | -1.081 | 0.473  | 8.12E-14 | 2.83E-11 |
| ENSG00000204323 | SMIM5    | 3.290  | 1.071  | 2.101  | 8.74E-14 | 2.95E-11 |
| ENSG00000166033 | HTRA1    | 12.721 | 1.517  | 2.863  | 9.35E-14 | 3.06E-11 |
| ENSG00000178752 | ERFE     | 4.722  | 2.265  | 4.807  | 9.98E-14 | 3.14E-11 |
| ENSG00000182218 | HHIPL1   | 6.407  | 1.049  | 2.069  | 1.02E-13 | 3.14E-11 |
| ENSG00000128487 | SPECC1   | 6.040  | 0.676  | 1.598  | 1.23E-13 | 3.67E-11 |
| ENSG00000144749 | LRIG1    | 5.685  | -0.720 | 0.607  | 1.31E-13 | 3.82E-11 |
| ENSG00000175093 | SPSB4    | 3.143  | 1.137  | 2.200  | 1.35E-13 | 3.82E-11 |
| ENSG00000172331 | BPGM     | 5.172  | 0.947  | 1.928  | 1.59E-13 | 4.38E-11 |
| ENSG00000131480 | AOC2     | 5.176  | 1.350  | 2.549  | 1.84E-13 | 4.93E-11 |
| ENSG00000181649 | PHLDA2   | 2.913  | 1.242  | 2.366  | 1.88E-13 | 4.93E-11 |
| ENSG00000105696 | TMEM59L  | 4.012  | 2.497  | 5.646  | 2.53E-13 | 6.46E-11 |
| ENSG00000229896 |          | 3.340  | 1.247  | 2.373  | 2.69E-13 | 6.61E-11 |
| ENSG00000269113 | TRABD2B  | 4.445  | -0.966 | 0.512  | 2.75E-13 | 6.61E-11 |
| ENSG00000176595 | KBTBD11  | 3.885  | -0.989 | 0.504  | 2.78E-13 | 6.61E-11 |
| ENSG00000171408 | PDE7B    | 4.474  | -0.833 | 0.561  | 3.40E-13 | 7.92E-11 |
| ENSG00000164176 | EDIL3    | 9.354  | -0.738 | 0.599  | 4.13E-13 | 9.39E-11 |
| ENSG00000169583 | CLIC3    | 2.987  | 2.067  | 4.191  | 4.50E-13 | 1.00E-10 |
| ENSG00000138449 | SLC40A1  | 7.516  | -1.007 | 0.498  | 4.89E-13 | 1.07E-10 |
| ENSG00000102362 | SYTL4    | 6.322  | 0.573  | 1.487  | 5.25E-13 | 1.12E-10 |

|                 |           |        |        |        |          |          |
|-----------------|-----------|--------|--------|--------|----------|----------|
| ENSG00000091137 | SLC26A4   | 4.526  | -1.443 | 0.368  | 5.36E-13 | 1.12E-10 |
| ENSG00000120254 | MTHFD1L   | 5.678  | 0.909  | 1.877  | 5.48E-13 | 1.13E-10 |
| ENSG00000165617 | DACT1     | 4.291  | -1.690 | 0.310  | 6.96E-13 | 1.40E-10 |
| ENSG00000180616 | SSTR2     | 3.822  | -1.197 | 0.436  | 1.01E-12 | 2.00E-10 |
| ENSG00000130294 | KIF1A     | 2.771  | -1.450 | 0.366  | 1.09E-12 | 2.11E-10 |
| ENSG00000168487 | BMP1      | 6.521  | 0.754  | 1.686  | 1.29E-12 | 2.46E-10 |
| ENSG00000078596 | ITM2A     | 7.261  | -1.065 | 0.478  | 1.53E-12 | 2.87E-10 |
| ENSG00000006016 | CRLF1     | 8.733  | 2.200  | 4.595  | 1.70E-12 | 3.09E-10 |
| ENSG00000102359 | SRPX2     | 7.680  | 0.967  | 1.955  | 1.71E-12 | 3.09E-10 |
| ENSG00000114270 | COL7A1    | 5.837  | 1.534  | 2.896  | 1.81E-12 | 3.20E-10 |
| ENSG00000168453 | HR        | 4.713  | 0.724  | 1.652  | 1.85E-12 | 3.22E-10 |
| ENSG00000091831 | ESR1      | 4.245  | -1.053 | 0.482  | 2.47E-12 | 4.24E-10 |
| ENSG00000225697 | SLC26A6   | 5.238  | 0.799  | 1.740  | 2.58E-12 | 4.35E-10 |
| ENSG00000137642 | SORL1     | 4.310  | -1.128 | 0.457  | 2.84E-12 | 4.72E-10 |
| ENSG00000127954 | STEAP4    | 5.695  | -1.634 | 0.322  | 3.08E-12 | 5.03E-10 |
| ENSG00000131471 | AOC3      | 3.781  | 1.153  | 2.224  | 3.14E-12 | 5.03E-10 |
| ENSG00000171621 | SPSB1     | 6.091  | 0.778  | 1.715  | 3.17E-12 | 5.03E-10 |
| ENSG00000095752 | IL11      | 7.720  | 4.587  | 24.040 | 3.76E-12 | 5.87E-10 |
| ENSG00000006453 | BAIAP2L1  | 4.396  | 0.773  | 1.709  | 4.06E-12 | 6.15E-10 |
| ENSG00000024422 | EHD2      | 7.109  | 0.454  | 1.370  | 4.09E-12 | 6.15E-10 |
| ENSG00000092445 | TYRO3     | 3.068  | 1.108  | 2.156  | 4.11E-12 | 6.15E-10 |
| ENSG00000172348 | RCAN2     | 4.624  | -2.255 | 0.210  | 5.26E-12 | 7.68E-10 |
| ENSG00000154556 | SORBS2    | 5.665  | 0.838  | 1.787  | 5.28E-12 | 7.68E-10 |
| ENSG00000152465 | NMT2      | 4.292  | -0.560 | 0.678  | 5.80E-12 | 8.31E-10 |
| ENSG00000182580 | EPHB3     | 4.580  | -0.886 | 0.541  | 6.40E-12 | 9.06E-10 |
| ENSG00000056736 | IL17RB    | 4.331  | -1.021 | 0.493  | 6.67E-12 | 9.31E-10 |
| ENSG00000176887 | SOX11     | 3.479  | 2.101  | 4.290  | 8.45E-12 | 1.16E-09 |
| ENSG00000178573 | MAF       | 6.288  | -0.756 | 0.592  | 9.41E-12 | 1.28E-09 |
| ENSG00000204071 | TCEAL6    | 4.069  | -1.023 | 0.492  | 9.73E-12 | 1.31E-09 |
| ENSG00000166145 | SPINT1    | 3.952  | 1.060  | 2.084  | 1.01E-11 | 1.34E-09 |
| ENSG00000140859 | KIFC3     | 6.140  | 0.641  | 1.559  | 1.04E-11 | 1.35E-09 |
| ENSG00000006327 | TNFRSF12A | 5.241  | 1.805  | 3.495  | 1.12E-11 | 1.45E-09 |
| ENSG00000228214 |           | 2.922  | -1.175 | 0.443  | 1.21E-11 | 1.55E-09 |
| ENSG00000070404 | FSTL3     | 5.475  | 1.292  | 2.448  | 1.47E-11 | 1.85E-09 |
| ENSG00000161638 | ITGA5     | 8.403  | 0.629  | 1.546  | 1.67E-11 | 2.08E-09 |
| ENSG00000149212 | SESN3     | 6.015  | -0.897 | 0.537  | 1.77E-11 | 2.19E-09 |
| ENSG00000181656 | GPR88     | 5.480  | -1.149 | 0.451  | 2.00E-11 | 2.44E-09 |
| ENSG00000169302 | STK32A    | 4.593  | -1.212 | 0.432  | 2.36E-11 | 2.84E-09 |
| ENSG00000145681 | HAPLN1    | 10.619 | -0.955 | 0.516  | 2.40E-11 | 2.86E-09 |
| ENSG00000185127 | C6orf120  | 4.182  | -0.374 | 0.772  | 2.89E-11 | 3.40E-09 |
| ENSG00000135919 | SERPINE2  | 8.788  | 1.476  | 2.782  | 3.08E-11 | 3.58E-09 |
| ENSG00000008513 | ST3GAL1   | 6.052  | 0.879  | 1.839  | 3.20E-11 | 3.68E-09 |
| ENSG00000034971 | MYOC      | 4.147  | -1.469 | 0.361  | 3.28E-11 | 3.73E-09 |
| ENSG00000151150 | ANK3      | 6.542  | 1.397  | 2.633  | 3.36E-11 | 3.78E-09 |
| ENSG00000189056 | RELN      | 4.380  | -2.496 | 0.177  | 3.47E-11 | 3.86E-09 |
| ENSG00000141469 | SLC14A1   | 7.447  | -1.356 | 0.391  | 3.63E-11 | 4.00E-09 |
| ENSG00000071073 | MGAT4A    | 3.046  | -0.985 | 0.505  | 4.11E-11 | 4.48E-09 |
| ENSG00000158560 | DYNC1I1   | 4.739  | -0.864 | 0.549  | 4.31E-11 | 4.65E-09 |
| ENSG00000105519 | CAPS      | 6.297  | 1.229  | 2.344  | 4.58E-11 | 4.85E-09 |
| ENSG00000105339 | DENND3    | 5.139  | 0.786  | 1.724  | 4.59E-11 | 4.85E-09 |
| ENSG00000090539 | CHRD      | 4.476  | 0.735  | 1.664  | 5.08E-11 | 5.32E-09 |
| ENSG00000164929 | BAALC     | 5.145  | 1.398  | 2.635  | 5.28E-11 | 5.48E-09 |

|                 |           |        |        |       |          |          |
|-----------------|-----------|--------|--------|-------|----------|----------|
| ENSG00000120658 | ENOX1     | 3.576  | 1.016  | 2.022 | 6.29E-11 | 6.46E-09 |
| ENSG00000235770 | LINC00607 | 2.956  | 1.471  | 2.772 | 7.15E-11 | 7.27E-09 |
| ENSG00000180354 | MTURN     | 5.464  | -0.625 | 0.649 | 7.34E-11 | 7.39E-09 |
| ENSG00000167191 | GPRC5B    | 5.186  | -1.200 | 0.435 | 7.81E-11 | 7.79E-09 |
| ENSG00000159212 | CLIC6     | 4.626  | 0.678  | 1.600 | 7.96E-11 | 7.86E-09 |
| ENSG00000214688 | C10orf105 | 5.876  | 1.465  | 2.762 | 8.36E-11 | 8.18E-09 |
| ENSG00000011422 | PLAUR     | 5.737  | 1.188  | 2.279 | 8.92E-11 | 8.64E-09 |
| ENSG00000034239 | EFCAB1    | 2.643  | -0.800 | 0.574 | 1.20E-10 | 1.15E-08 |
| ENSG00000146674 | IGFBP3    | 7.282  | 1.801  | 3.484 | 1.38E-10 | 1.30E-08 |
| ENSG00000048052 | HDAC9     | 5.336  | -1.049 | 0.483 | 1.38E-10 | 1.30E-08 |
| ENSG00000105227 | PRX       | 3.248  | -0.788 | 0.579 | 1.42E-10 | 1.33E-08 |
| ENSG00000002745 | WNT16     | 4.429  | 3.288  | 9.765 | 1.44E-10 | 1.33E-08 |
| ENSG00000187595 | ZNF385C   | 4.471  | -1.323 | 0.400 | 1.51E-10 | 1.39E-08 |
| ENSG00000196405 | EVL       | 6.084  | 0.720  | 1.648 | 1.58E-10 | 1.44E-08 |
| ENSG00000102804 | TSC22D1   | 9.932  | -0.604 | 0.658 | 1.66E-10 | 1.50E-08 |
| ENSG00000134882 | UBAC2     | 6.173  | 0.638  | 1.556 | 1.87E-10 | 1.66E-08 |
| ENSG00000069535 | MAOB      | 6.707  | -0.698 | 0.617 | 1.87E-10 | 1.66E-08 |
| ENSG00000142875 | PRKACB    | 5.033  | -0.515 | 0.700 | 1.89E-10 | 1.66E-08 |
| ENSG00000156427 | FGF18     | 4.340  | 0.971  | 1.960 | 1.93E-10 | 1.69E-08 |
| ENSG00000164761 | TNFRSF11B | 9.047  | 1.387  | 2.616 | 2.04E-10 | 1.75E-08 |
| ENSG00000146530 | VWDE      | 3.027  | -1.185 | 0.440 | 2.04E-10 | 1.75E-08 |
| ENSG00000186106 | ANKRD46   | 3.703  | -0.484 | 0.715 | 2.14E-10 | 1.82E-08 |
| ENSG00000122756 | CNTFR     | 6.084  | -1.586 | 0.333 | 2.25E-10 | 1.90E-08 |
| ENSG00000090006 | LTBP4     | 8.227  | 0.640  | 1.559 | 2.31E-10 | 1.93E-08 |
| ENSG00000109099 | PMP22     | 8.601  | 0.520  | 1.434 | 2.40E-10 | 1.99E-08 |
| ENSG00000172164 | SNTB1     | 3.839  | 0.892  | 1.855 | 2.63E-10 | 2.17E-08 |
| ENSG00000144908 | ALDH1L1   | 3.328  | -1.128 | 0.458 | 2.75E-10 | 2.25E-08 |
| ENSG00000169255 | B3GALNT1  | 4.140  | -0.786 | 0.580 | 2.83E-10 | 2.29E-08 |
| ENSG00000104783 | KCNN4     | 5.107  | 1.717  | 3.287 | 2.96E-10 | 2.38E-08 |
| ENSG00000233251 |           | 3.931  | -1.584 | 0.334 | 3.00E-10 | 2.40E-08 |
| ENSG00000153162 | BMP6      | 5.394  | 1.405  | 2.649 | 3.06E-10 | 2.42E-08 |
| ENSG00000196754 | S100A2    | 3.322  | 2.145  | 4.423 | 3.26E-10 | 2.57E-08 |
| ENSG00000145687 | SSBP2     | 4.953  | -0.469 | 0.723 | 3.33E-10 | 2.60E-08 |
| ENSG00000109814 | UGDH      | 6.481  | 0.573  | 1.488 | 3.48E-10 | 2.70E-08 |
| ENSG00000137269 | LRRC1     | 3.573  | 0.574  | 1.489 | 3.51E-10 | 2.70E-08 |
| ENSG00000105852 | PON3      | 2.581  | -0.778 | 0.583 | 3.85E-10 | 2.94E-08 |
| ENSG00000160111 | CPAMD8    | 8.061  | -1.220 | 0.429 | 4.10E-10 | 3.11E-08 |
| ENSG00000185340 | GAS2L1    | 4.545  | 0.743  | 1.673 | 4.17E-10 | 3.13E-08 |
| ENSG00000121005 | CRISPLD1  | 8.854  | -1.991 | 0.252 | 4.18E-10 | 3.13E-08 |
| ENSG00000139910 | NOVA1     | 4.962  | 1.078  | 2.111 | 4.29E-10 | 3.18E-08 |
| ENSG00000075651 | PLD1      | 3.775  | 0.601  | 1.516 | 4.38E-10 | 3.22E-08 |
| ENSG00000176490 | DIRAS1    | 4.441  | 1.284  | 2.435 | 4.40E-10 | 3.22E-08 |
| ENSG00000115414 | FN1       | 16.471 | 1.128  | 2.186 | 4.68E-10 | 3.40E-08 |
| ENSG00000162687 | KCNT2     | 4.448  | -1.202 | 0.435 | 4.89E-10 | 3.53E-08 |
| ENSG00000170542 | SERPINB9  | 3.359  | -0.555 | 0.681 | 5.15E-10 | 3.70E-08 |
| ENSG00000180672 |           | 5.162  | 1.017  | 2.023 | 5.27E-10 | 3.75E-08 |
| ENSG00000144648 | ACKR2     | 3.111  | 1.131  | 2.190 | 5.31E-10 | 3.76E-08 |
| ENSG00000170088 | TMEM192   | 4.377  | -0.377 | 0.770 | 5.45E-10 | 3.83E-08 |
| ENSG00000102007 | PLP2      | 6.302  | 0.485  | 1.400 | 6.66E-10 | 4.65E-08 |
| ENSG00000174791 | RIN1      | 4.639  | 0.887  | 1.850 | 6.82E-10 | 4.73E-08 |
| ENSG00000165795 | NDRG2     | 7.470  | -0.801 | 0.574 | 7.20E-10 | 4.96E-08 |
| ENSG00000005238 | FAM214B   | 4.887  | 0.509  | 1.423 | 7.60E-10 | 5.20E-08 |

|                 |          |        |        |       |          |          |
|-----------------|----------|--------|--------|-------|----------|----------|
| ENSG00000257337 |          | 4.827  | -0.771 | 0.586 | 8.00E-10 | 5.44E-08 |
| ENSG00000183891 | TTC32    | 3.315  | -0.551 | 0.682 | 8.31E-10 | 5.56E-08 |
| ENSG00000145247 | OCIAD2   | 2.930  | 1.190  | 2.282 | 8.34E-10 | 5.56E-08 |
| ENSG00000009830 | POMT2    | 4.264  | 0.542  | 1.456 | 8.34E-10 | 5.56E-08 |
| ENSG00000164292 | RHOBTB3  | 6.257  | -0.800 | 0.574 | 8.67E-10 | 5.74E-08 |
| ENSG00000107623 |          | 8.781  | -1.493 | 0.355 | 9.09E-10 | 5.98E-08 |
| ENSG00000077063 | CTTNBP2  | 4.344  | -1.174 | 0.443 | 9.84E-10 | 6.44E-08 |
| ENSG00000066322 | ELOVL1   | 5.348  | 0.594  | 1.509 | 1.01E-09 | 6.55E-08 |
| ENSG00000134602 | STK26    | 7.662  | -0.827 | 0.564 | 1.08E-09 | 6.97E-08 |
| ENSG00000152137 | HSPB8    | 4.677  | 0.849  | 1.801 | 1.12E-09 | 7.17E-08 |
| ENSG00000169047 | IRS1     | 4.887  | -0.845 | 0.557 | 1.18E-09 | 7.54E-08 |
| ENSG00000215386 | MIR99AHG | 3.759  | -0.634 | 0.644 | 1.26E-09 | 8.01E-08 |
| ENSG00000066468 | FGFR2    | 7.641  | -0.869 | 0.547 | 1.34E-09 | 8.43E-08 |
| ENSG00000064225 | ST3GAL6  | 2.758  | -0.928 | 0.526 | 1.46E-09 | 9.13E-08 |
| ENSG00000140598 | EFL1     | 4.026  | 0.534  | 1.448 | 1.52E-09 | 9.46E-08 |
| ENSG00000102409 | BEX4     | 5.496  | -0.459 | 0.728 | 1.57E-09 | 9.69E-08 |
| ENSG00000196542 | SPTSSB   | 4.525  | -1.630 | 0.323 | 1.57E-09 | 9.69E-08 |
| ENSG00000151748 | SAV1     | 5.903  | -0.536 | 0.690 | 1.72E-09 | 1.05E-07 |
| ENSG00000165238 | WNK2     | 3.925  | -1.887 | 0.270 | 1.76E-09 | 1.07E-07 |
| ENSG00000169231 | THBS3    | 7.395  | 0.946  | 1.926 | 1.86E-09 | 1.13E-07 |
| ENSG00000163399 | ATP1A1   | 7.840  | 0.454  | 1.370 | 1.90E-09 | 1.15E-07 |
| ENSG00000272268 |          | 2.930  | 1.192  | 2.285 | 1.96E-09 | 1.18E-07 |
| ENSG00000117143 | UAP1     | 7.260  | 0.597  | 1.512 | 2.00E-09 | 1.19E-07 |
| ENSG0000013588  | GPRC5A   | 5.144  | 0.689  | 1.612 | 2.02E-09 | 1.19E-07 |
| ENSG00000166986 | MARS     | 5.832  | 0.403  | 1.322 | 2.11E-09 | 1.24E-07 |
| ENSG00000115325 | DOK1     | 5.960  | 0.758  | 1.692 | 2.13E-09 | 1.25E-07 |
| ENSG00000187957 | DNER     | 6.341  | 1.807  | 3.500 | 2.21E-09 | 1.29E-07 |
| ENSG00000142156 | COL6A1   | 11.272 | 0.796  | 1.737 | 2.27E-09 | 1.31E-07 |
| ENSG00000123838 | C4BPA    | 3.482  | -1.790 | 0.289 | 2.30E-09 | 1.32E-07 |
| ENSG00000152270 | PDE3B    | 3.798  | -2.068 | 0.238 | 2.34E-09 | 1.34E-07 |
| ENSG00000082781 | ITGB5    | 9.047  | 0.740  | 1.671 | 2.53E-09 | 1.44E-07 |
| ENSG00000197461 | PDGFA    | 4.930  | 0.675  | 1.596 | 2.55E-09 | 1.44E-07 |
| ENSG00000137699 | TRIM29   | 4.547  | 1.109  | 2.157 | 2.63E-09 | 1.48E-07 |
| ENSG00000111962 | UST      | 3.666  | -0.580 | 0.669 | 2.73E-09 | 1.53E-07 |
| ENSG00000164949 | GEM      | 6.085  | -0.910 | 0.532 | 3.03E-09 | 1.69E-07 |
| ENSG00000162512 | SDC3     | 6.810  | -1.326 | 0.399 | 3.11E-09 | 1.72E-07 |
| ENSG00000145675 | PIK3R1   | 6.971  | -0.973 | 0.510 | 3.14E-09 | 1.73E-07 |
| ENSG00000163697 | APBB2    | 5.237  | -0.593 | 0.663 | 3.16E-09 | 1.73E-07 |
| ENSG00000135318 | NT5E     | 8.571  | 0.914  | 1.884 | 3.20E-09 | 1.74E-07 |
| ENSG00000154319 | FAM167A  | 2.906  | 1.590  | 3.011 | 3.21E-09 | 1.74E-07 |
| ENSG00000160991 | ORAI2    | 5.574  | 0.402  | 1.322 | 3.27E-09 | 1.76E-07 |
| ENSG00000021300 | PLEKHB1  | 4.433  | -0.733 | 0.601 | 3.40E-09 | 1.82E-07 |
| ENSG00000106366 | SERPINE1 | 8.131  | 1.862  | 3.634 | 3.58E-09 | 1.91E-07 |
| ENSG00000050628 | PTGER3   | 3.165  | -1.876 | 0.272 | 3.66E-09 | 1.95E-07 |
| ENSG00000264868 |          | 2.614  | -1.419 | 0.374 | 3.85E-09 | 2.04E-07 |
| ENSG00000173621 | LRFN4    | 3.218  | 0.588  | 1.503 | 3.92E-09 | 2.06E-07 |
| ENSG00000087116 | ADAMTS2  | 6.687  | 1.005  | 2.006 | 4.71E-09 | 2.47E-07 |
| ENSG00000205221 | VIT      | 6.078  | -2.270 | 0.207 | 4.75E-09 | 2.47E-07 |
| ENSG00000130508 | PXDN     | 7.085  | 0.944  | 1.924 | 4.85E-09 | 2.51E-07 |
| ENSG00000117411 | B4GALT2  | 6.654  | 0.522  | 1.436 | 5.06E-09 | 2.61E-07 |
| ENSG00000169764 | UGP2     | 8.383  | 0.603  | 1.519 | 5.44E-09 | 2.79E-07 |
| ENSG00000163728 | TTC14    | 5.173  | -0.600 | 0.660 | 6.18E-09 | 3.15E-07 |

|                 |          |        |        |       |          |          |
|-----------------|----------|--------|--------|-------|----------|----------|
| ENSG00000189058 | APOD     | 8.265  | -1.512 | 0.351 | 6.47E-09 | 3.29E-07 |
| ENSG00000163171 | CDC42EP3 | 4.838  | -0.753 | 0.593 | 6.70E-09 | 3.38E-07 |
| ENSG00000112312 | GMNN     | 2.893  | 0.943  | 1.923 | 6.71E-09 | 3.38E-07 |
| ENSG00000132122 | SPATA6   | 3.203  | -0.533 | 0.691 | 6.78E-09 | 3.40E-07 |
| ENSG00000144152 | FBLN7    | 6.709  | -0.881 | 0.543 | 7.25E-09 | 3.61E-07 |
| ENSG00000187446 | CHP1     | 5.259  | 0.405  | 1.324 | 7.35E-09 | 3.65E-07 |
| ENSG00000138316 | ADAMTS14 | 3.529  | 1.898  | 3.726 | 7.39E-09 | 3.65E-07 |
| ENSG00000137941 | TTLL7    | 4.968  | -0.825 | 0.564 | 7.91E-09 | 3.89E-07 |
| ENSG00000198915 | RASGEF1A | 2.814  | -0.693 | 0.619 | 8.07E-09 | 3.95E-07 |
| ENSG00000149968 | MMP3     | 8.434  | -1.258 | 0.418 | 8.81E-09 | 4.29E-07 |
| ENSG00000055163 | CYFIP2   | 3.225  | 1.235  | 2.355 | 8.97E-09 | 4.35E-07 |
| ENSG00000107249 | GLIS3    | 4.037  | 1.087  | 2.124 | 9.11E-09 | 4.40E-07 |
| ENSG00000100626 | GALNT16  | 6.646  | 1.303  | 2.468 | 9.21E-09 | 4.42E-07 |
| ENSG00000185989 | RASA3    | 5.344  | 0.367  | 1.290 | 9.41E-09 | 4.50E-07 |
| ENSG00000162998 | FRZB     | 9.571  | -2.150 | 0.225 | 9.48E-09 | 4.51E-07 |
| ENSG00000163536 | SERPINI1 | 5.380  | -0.767 | 0.588 | 9.59E-09 | 4.54E-07 |
| ENSG00000146233 | CYP39A1  | 2.951  | -1.037 | 0.487 | 9.88E-09 | 4.66E-07 |
| ENSG00000105664 | COMP     | 14.981 | 0.957  | 1.941 | 9.97E-09 | 4.68E-07 |
| ENSG00000198925 | ATG9A    | 5.180  | 0.309  | 1.239 | 1.00E-08 | 4.69E-07 |
| ENSG00000111728 | ST8SIA1  | 3.218  | -0.590 | 0.664 | 1.02E-08 | 4.73E-07 |
| ENSG00000173599 | PC       | 5.803  | 0.391  | 1.311 | 1.04E-08 | 4.79E-07 |
| ENSG00000183688 | RFLNB    | 4.463  | 0.815  | 1.760 | 1.04E-08 | 4.81E-07 |
| ENSG00000198732 | SMOC1    | 9.114  | 0.654  | 1.573 | 1.05E-08 | 4.84E-07 |
| ENSG00000158825 | CDA      | 4.201  | 0.659  | 1.579 | 1.07E-08 | 4.88E-07 |
| ENSG00000123610 | TNFAIP6  | 6.713  | 1.911  | 3.760 | 1.08E-08 | 4.89E-07 |
| ENSG00000157514 | TSC22D3  | 8.401  | 0.703  | 1.628 | 1.08E-08 | 4.91E-07 |
| ENSG00000131711 | MAP1B    | 3.774  | 0.940  | 1.919 | 1.11E-08 | 5.00E-07 |
| ENSG00000224389 | C4B      | 3.782  | -1.047 | 0.484 | 1.13E-08 | 5.07E-07 |
| ENSG00000065357 | DGKA     | 4.652  | 0.395  | 1.315 | 1.14E-08 | 5.08E-07 |
| ENSG00000133985 | TTC9     | 4.279  | 1.598  | 3.027 | 1.25E-08 | 5.55E-07 |
| ENSG00000106785 | TRIM14   | 2.746  | -0.639 | 0.642 | 1.28E-08 | 5.69E-07 |
| ENSG00000198848 | CES1     | 2.798  | -1.188 | 0.439 | 1.31E-08 | 5.80E-07 |
| ENSG00000267194 |          | 5.044  | -0.836 | 0.560 | 1.34E-08 | 5.90E-07 |
| ENSG00000054392 | HHAT     | 4.596  | -0.681 | 0.624 | 1.44E-08 | 6.32E-07 |
| ENSG00000067057 | PFKP     | 8.236  | 0.549  | 1.463 | 1.51E-08 | 6.59E-07 |
| ENSG00000114378 | HYAL1    | 5.353  | 0.421  | 1.339 | 1.55E-08 | 6.74E-07 |
| ENSG00000138613 | APH1B    | 4.562  | -0.429 | 0.743 | 1.57E-08 | 6.80E-07 |
| ENSG00000198805 | PNP      | 4.096  | 0.979  | 1.971 | 1.60E-08 | 6.90E-07 |
| ENSG00000158352 | SHROOM4  | 3.463  | 0.745  | 1.676 | 1.61E-08 | 6.90E-07 |
| ENSG00000177990 | DPY19L2  | 2.742  | -0.968 | 0.511 | 1.67E-08 | 7.14E-07 |
| ENSG00000114738 | MAPKAPK3 | 4.293  | 0.667  | 1.587 | 1.68E-08 | 7.15E-07 |
| ENSG00000183876 | ARSI     | 3.024  | 1.218  | 2.327 | 1.70E-08 | 7.19E-07 |
| ENSG00000112964 | GHR      | 4.929  | -0.765 | 0.589 | 1.70E-08 | 7.19E-07 |
| ENSG00000125844 | RRBP1    | 9.180  | 0.389  | 1.310 | 1.71E-08 | 7.19E-07 |
| ENSG00000105835 | NAMPT    | 6.540  | -0.759 | 0.591 | 1.75E-08 | 7.32E-07 |
| ENSG00000101000 | PROCR    | 6.566  | 0.630  | 1.548 | 1.76E-08 | 7.34E-07 |
| ENSG00000158301 | GPRASP2  | 4.891  | -0.530 | 0.693 | 1.80E-08 | 7.47E-07 |
| ENSG00000131149 | GSE1     | 4.578  | -0.885 | 0.541 | 2.02E-08 | 8.35E-07 |
| ENSG00000111859 | NEDD9    | 3.272  | 0.808  | 1.751 | 2.07E-08 | 8.52E-07 |
| ENSG00000103257 | SLC7A5   | 4.889  | 1.156  | 2.228 | 2.13E-08 | 8.74E-07 |
| ENSG00000198113 | TOR4A    | 4.013  | 0.398  | 1.317 | 2.20E-08 | 9.00E-07 |
| ENSG00000017483 | SLC38A5  | 4.666  | 1.157  | 2.230 | 2.23E-08 | 9.09E-07 |

|                 |         |        |        |       |          |          |
|-----------------|---------|--------|--------|-------|----------|----------|
| ENSG00000088298 | EDEM2   | 4.883  | 0.527  | 1.441 | 2.27E-08 | 9.21E-07 |
| ENSG00000039560 | RAI14   | 5.434  | 0.870  | 1.828 | 2.34E-08 | 9.44E-07 |
| ENSG00000205726 | ITSN1   | 5.896  | -0.876 | 0.545 | 2.39E-08 | 9.63E-07 |
| ENSG00000101493 | ZNF516  | 3.799  | -0.473 | 0.721 | 2.49E-08 | 9.98E-07 |
| ENSG00000175505 | CLCF1   | 3.198  | 1.064  | 2.091 | 2.57E-08 | 1.03E-06 |
| ENSG00000198919 | DZIP3   | 4.515  | -0.584 | 0.667 | 2.62E-08 | 1.04E-06 |
| ENSG00000143816 | WNT9A   | 3.812  | 1.372  | 2.588 | 2.70E-08 | 1.07E-06 |
| ENSG00000179403 | VWA1    | 6.834  | 0.541  | 1.455 | 2.72E-08 | 1.07E-06 |
| ENSG00000175048 | ZDHHC14 | 3.484  | -0.691 | 0.620 | 2.74E-08 | 1.08E-06 |
| ENSG00000056998 | GYG2    | 2.841  | -0.805 | 0.572 | 2.78E-08 | 1.09E-06 |
| ENSG00000154153 | FAM134B | 7.074  | 0.659  | 1.579 | 2.79E-08 | 1.09E-06 |
| ENSG00000170801 | HTRA3   | 6.979  | 0.733  | 1.663 | 2.80E-08 | 1.09E-06 |
| ENSG00000128602 | SMO     | 6.825  | -0.599 | 0.660 | 2.87E-08 | 1.11E-06 |
| ENSG00000144161 | ZC3H8   | 4.233  | -0.554 | 0.681 | 2.93E-08 | 1.13E-06 |
| ENSG00000142173 | COL6A2  | 11.816 | 0.751  | 1.683 | 3.04E-08 | 1.17E-06 |
| ENSG00000167077 | MEI1    | 3.390  | -0.771 | 0.586 | 3.18E-08 | 1.22E-06 |
| ENSG00000120832 | MTERF2  | 2.862  | -0.533 | 0.691 | 3.19E-08 | 1.22E-06 |
| ENSG00000133048 | CHI3L1  | 11.410 | -0.943 | 0.520 | 3.21E-08 | 1.22E-06 |
| ENSG00000134198 | TSPAN2  | 7.791  | 0.965  | 1.952 | 3.44E-08 | 1.30E-06 |
| ENSG00000092820 | EZR     | 5.988  | 0.900  | 1.866 | 3.51E-08 | 1.33E-06 |
| ENSG00000129355 | CDKN2D  | 4.233  | 0.590  | 1.505 | 3.52E-08 | 1.33E-06 |
| ENSG00000131435 | PDLIM4  | 5.852  | 0.517  | 1.431 | 3.54E-08 | 1.33E-06 |
| ENSG00000155324 | GRAMD3  | 4.076  | -0.393 | 0.761 | 3.70E-08 | 1.38E-06 |
| ENSG00000170955 | PRKCDBP | 5.592  | 0.670  | 1.591 | 3.71E-08 | 1.38E-06 |
| ENSG00000182168 | UNC5C   | 4.895  | -0.857 | 0.552 | 3.77E-08 | 1.40E-06 |
| ENSG00000167772 | ANGPTL4 | 7.966  | 1.259  | 2.394 | 4.00E-08 | 1.48E-06 |
| ENSG00000164619 | BMPER   | 4.685  | -1.155 | 0.449 | 4.05E-08 | 1.49E-06 |
| ENSG00000097021 | ACOT7   | 4.362  | 0.886  | 1.848 | 4.05E-08 | 1.49E-06 |
| ENSG00000129244 | ATP1B2  | 3.639  | -0.971 | 0.510 | 4.07E-08 | 1.49E-06 |
| ENSG00000174628 | IQCK    | 3.335  | -0.500 | 0.707 | 4.07E-08 | 1.49E-06 |
| ENSG00000131459 | GFPT2   | 6.752  | 0.614  | 1.531 | 4.10E-08 | 1.49E-06 |
| ENSG00000168056 | LTBP3   | 9.827  | 0.432  | 1.349 | 4.13E-08 | 1.50E-06 |
| ENSG00000120837 | NFYB    | 4.576  | -0.340 | 0.790 | 4.15E-08 | 1.50E-06 |
| ENSG00000164877 | MICALL2 | 5.180  | 0.474  | 1.389 | 4.36E-08 | 1.57E-06 |
| ENSG00000179862 | CITED4  | 2.754  | 1.545  | 2.917 | 4.42E-08 | 1.58E-06 |
| ENSG00000144040 | SFXN5   | 3.947  | 0.436  | 1.353 | 4.50E-08 | 1.61E-06 |
| ENSG00000006534 | ALDH3B1 | 4.415  | 0.601  | 1.516 | 4.63E-08 | 1.65E-06 |
| ENSG00000144843 | ADPRH   | 3.103  | 0.590  | 1.505 | 4.85E-08 | 1.72E-06 |
| ENSG00000160410 | SHKBP1  | 4.804  | 0.487  | 1.402 | 5.01E-08 | 1.77E-06 |
| ENSG00000153902 | LGI4    | 5.227  | -1.291 | 0.409 | 5.17E-08 | 1.82E-06 |
| ENSG00000100350 | FOXRED2 | 3.027  | -0.475 | 0.720 | 5.17E-08 | 1.82E-06 |
| ENSG00000179542 | SLITRK4 | 3.164  | -1.300 | 0.406 | 5.19E-08 | 1.82E-06 |
| ENSG00000244734 | HBB     | 8.314  | 1.580  | 2.989 | 5.23E-08 | 1.82E-06 |
| ENSG00000111863 | ADTRP   | 3.681  | 1.312  | 2.482 | 5.28E-08 | 1.84E-06 |
| ENSG00000108984 | MAP2K6  | 5.211  | -0.753 | 0.593 | 5.30E-08 | 1.84E-06 |
| ENSG00000206172 | HBA1    | 4.119  | 1.756  | 3.379 | 5.45E-08 | 1.88E-06 |
| ENSG00000177697 | CD151   | 7.894  | 0.719  | 1.646 | 5.76E-08 | 1.98E-06 |
| ENSG00000116991 | SIPA1L2 | 6.039  | 0.888  | 1.851 | 5.90E-08 | 2.03E-06 |
| ENSG00000013619 | MAMLD1  | 2.758  | 0.722  | 1.650 | 5.97E-08 | 2.04E-06 |
| ENSG00000204136 | GGTA1P  | 4.101  | -1.239 | 0.424 | 5.99E-08 | 2.04E-06 |
| ENSG00000188064 | WNT7B   | 2.920  | 1.813  | 3.514 | 6.15E-08 | 2.08E-06 |
| ENSG00000093167 | LRRFIP2 | 6.181  | 0.427  | 1.345 | 6.15E-08 | 2.08E-06 |

|                 |          |        |        |       |          |          |
|-----------------|----------|--------|--------|-------|----------|----------|
| ENSG00000054219 | LY75     | 2.923  | -0.767 | 0.588 | 6.17E-08 | 2.08E-06 |
| ENSG00000100036 | SLC35E4  | 2.822  | 1.047  | 2.067 | 6.28E-08 | 2.11E-06 |
| ENSG00000169439 | SDC2     | 9.208  | -0.340 | 0.790 | 6.64E-08 | 2.23E-06 |
| ENSG00000133104 | SPG20    | 5.953  | -0.354 | 0.783 | 6.80E-08 | 2.27E-06 |
| ENSG00000074181 | NOTCH3   | 4.882  | 1.705  | 3.261 | 6.91E-08 | 2.30E-06 |
| ENSG00000150540 | HNMT     | 4.379  | -0.495 | 0.710 | 7.00E-08 | 2.32E-06 |
| ENSG00000120802 | TMPO     | 4.165  | -0.434 | 0.740 | 7.03E-08 | 2.32E-06 |
| ENSG00000007171 | NOS2     | 3.223  | 0.650  | 1.569 | 7.04E-08 | 2.32E-06 |
| ENSG00000137285 | TUBB2B   | 5.207  | -0.760 | 0.590 | 7.08E-08 | 2.33E-06 |
| ENSG00000129925 | TMEM8A   | 4.569  | 0.467  | 1.383 | 7.14E-08 | 2.34E-06 |
| ENSG00000168564 | CDKN2AIP | 4.695  | -0.331 | 0.795 | 7.26E-08 | 2.38E-06 |
| ENSG00000003989 | SLC7A2   | 7.709  | 0.916  | 1.886 | 7.93E-08 | 2.58E-06 |
| ENSG00000148660 | CAMK2G   | 4.310  | -0.470 | 0.722 | 8.01E-08 | 2.61E-06 |
| ENSG00000269783 |          | 5.001  | 1.012  | 2.016 | 8.42E-08 | 2.73E-06 |
| ENSG00000198417 | MT1F     | 5.469  | 0.957  | 1.942 | 8.51E-08 | 2.75E-06 |
| ENSG00000183691 | NOG      | 2.766  | 1.147  | 2.214 | 8.82E-08 | 2.84E-06 |
| ENSG00000109919 | MTCH2    | 4.582  | 0.417  | 1.335 | 8.97E-08 | 2.88E-06 |
| ENSG00000169180 | XPO6     | 5.565  | 0.286  | 1.219 | 9.03E-08 | 2.89E-06 |
| ENSG00000113758 | DBN1     | 4.836  | 0.681  | 1.604 | 9.49E-08 | 3.03E-06 |
| ENSG00000158710 | TAGLN2   | 8.306  | 0.826  | 1.773 | 9.74E-08 | 3.10E-06 |
| ENSG00000170915 | PAQR8    | 2.868  | -0.494 | 0.710 | 9.91E-08 | 3.14E-06 |
| ENSG00000205358 | MT1H     | 3.636  | 1.537  | 2.901 | 1.01E-07 | 3.18E-06 |
| ENSG00000120875 | DUSP4    | 3.382  | 1.717  | 3.288 | 1.03E-07 | 3.26E-06 |
| ENSG00000153291 | SLC25A27 | 4.913  | -0.776 | 0.584 | 1.06E-07 | 3.34E-06 |
| ENSG00000163359 | COL6A3   | 10.768 | 1.086  | 2.123 | 1.09E-07 | 3.41E-06 |
| ENSG00000198792 | TMEM184B | 5.336  | 0.393  | 1.313 | 1.09E-07 | 3.42E-06 |
| ENSG00000152219 | ARL14EP  | 4.229  | -0.311 | 0.806 | 1.12E-07 | 3.49E-06 |
| ENSG00000125648 | SLC25A23 | 4.077  | 0.331  | 1.258 | 1.18E-07 | 3.65E-06 |
| ENSG00000151491 | EPS8     | 6.944  | -0.596 | 0.662 | 1.21E-07 | 3.74E-06 |
| ENSG00000149090 | PAMR1    | 3.738  | 1.110  | 2.159 | 1.24E-07 | 3.82E-06 |
| ENSG00000124406 | ATP8A1   | 2.643  | -0.884 | 0.542 | 1.25E-07 | 3.83E-06 |
| ENSG00000138413 | IDH1     | 5.851  | -0.414 | 0.750 | 1.27E-07 | 3.91E-06 |
| ENSG00000080845 | DLGAP4   | 5.731  | 0.366  | 1.289 | 1.29E-07 | 3.95E-06 |
| ENSG00000188536 | HBA2     | 6.261  | 1.816  | 3.522 | 1.30E-07 | 3.97E-06 |
| ENSG00000110315 | RNF141   | 4.595  | -0.359 | 0.780 | 1.31E-07 | 3.99E-06 |
| ENSG00000155849 | ELMO1    | 4.398  | 0.618  | 1.534 | 1.33E-07 | 4.04E-06 |
| ENSG00000032742 | IFT88    | 3.878  | -0.406 | 0.755 | 1.34E-07 | 4.06E-06 |
| ENSG00000106976 | DNM1     | 6.375  | 0.457  | 1.373 | 1.35E-07 | 4.08E-06 |
| ENSG00000182752 | PAPPA    | 5.009  | 1.825  | 3.544 | 1.43E-07 | 4.29E-06 |
| ENSG00000125144 | MT1G     | 6.978  | 1.491  | 2.811 | 1.43E-07 | 4.29E-06 |
| ENSG00000146242 | TPBG     | 5.860  | 0.376  | 1.298 | 1.49E-07 | 4.45E-06 |
| ENSG00000046889 | PREX2    | 3.268  | 1.347  | 2.543 | 1.49E-07 | 4.45E-06 |
| ENSG00000095303 | PTGS1    | 5.867  | -0.713 | 0.610 | 1.52E-07 | 4.51E-06 |
| ENSG00000171055 | FEZ2     | 4.794  | -0.314 | 0.804 | 1.57E-07 | 4.65E-06 |
| ENSG00000137309 | HMGA1    | 3.213  | 1.192  | 2.285 | 1.62E-07 | 4.80E-06 |
| ENSG00000118985 | ELL2     | 7.277  | -0.606 | 0.657 | 1.63E-07 | 4.81E-06 |
| ENSG00000105810 | CDK6     | 4.762  | 0.823  | 1.770 | 1.66E-07 | 4.86E-06 |
| ENSG00000128284 | APOL3    | 4.436  | -0.887 | 0.541 | 1.66E-07 | 4.86E-06 |
| ENSG00000134013 | LOXL2    | 7.400  | 1.215  | 2.321 | 1.67E-07 | 4.90E-06 |
| ENSG00000151632 | AKR1C2   | 6.749  | 0.871  | 1.830 | 1.69E-07 | 4.94E-06 |
| ENSG00000177042 | TMEM80   | 3.919  | -0.454 | 0.730 | 1.75E-07 | 5.08E-06 |
| ENSG00000181031 | RPH3AL   | 4.133  | 0.558  | 1.473 | 1.76E-07 | 5.10E-06 |

|                 |            |        |        |       |          |          |
|-----------------|------------|--------|--------|-------|----------|----------|
| ENSG00000101190 | TCFL5      | 4.135  | -0.492 | 0.711 | 1.93E-07 | 5.59E-06 |
| ENSG00000167601 | AXL        | 6.735  | 0.411  | 1.329 | 2.02E-07 | 5.81E-06 |
| ENSG00000177663 | IL17RA     | 3.822  | 0.448  | 1.364 | 2.14E-07 | 6.14E-06 |
| ENSG00000167114 | SLC27A4    | 4.027  | 0.656  | 1.575 | 2.14E-07 | 6.14E-06 |
| ENSG00000137962 | ARHGAP29   | 5.105  | -0.942 | 0.521 | 2.15E-07 | 6.14E-06 |
| ENSG00000095713 | CRTAC1     | 12.029 | 0.973  | 1.962 | 2.17E-07 | 6.19E-06 |
| ENSG00000144857 | BOC        | 7.490  | -0.863 | 0.550 | 2.18E-07 | 6.19E-06 |
| ENSG00000197380 | DACT3      | 3.290  | -0.687 | 0.621 | 2.22E-07 | 6.30E-06 |
| ENSG00000171817 | ZNF540     | 2.584  | -0.521 | 0.697 | 2.24E-07 | 6.33E-06 |
| ENSG00000102760 | RGCC       | 8.532  | 0.629  | 1.546 | 2.25E-07 | 6.33E-06 |
| ENSG00000196693 | ZNF33B     | 2.895  | -0.648 | 0.638 | 2.26E-07 | 6.35E-06 |
| ENSG00000077044 | DGKD       | 4.634  | 0.564  | 1.478 | 2.27E-07 | 6.37E-06 |
| ENSG00000204291 | COL15A1    | 8.923  | 0.972  | 1.962 | 2.28E-07 | 6.38E-06 |
| ENSG00000117069 | ST6GALNAC5 | 3.783  | 1.673  | 3.190 | 2.34E-07 | 6.54E-06 |
| ENSG00000177989 | ODF3B      | 4.010  | 1.003  | 2.004 | 2.39E-07 | 6.65E-06 |
| ENSG00000154721 | JAM2       | 3.617  | -0.691 | 0.619 | 2.45E-07 | 6.81E-06 |
| ENSG00000114850 | SSR3       | 8.354  | -0.416 | 0.749 | 2.51E-07 | 6.95E-06 |
| ENSG00000187189 | TSPYL4     | 4.954  | -0.484 | 0.715 | 2.57E-07 | 7.09E-06 |
| ENSG00000110092 | CCND1      | 5.340  | 0.960  | 1.946 | 2.60E-07 | 7.15E-06 |
| ENSG00000204789 | ZNF204P    | 4.137  | -0.577 | 0.670 | 2.69E-07 | 7.40E-06 |
| ENSG00000049192 | ADAMTS6    | 5.860  | 1.114  | 2.165 | 2.77E-07 | 7.59E-06 |
| ENSG00000138356 | AOX1       | 3.875  | -0.540 | 0.688 | 2.82E-07 | 7.71E-06 |
| ENSG00000169908 | TM4SF1     | 7.017  | 0.612  | 1.529 | 2.86E-07 | 7.79E-06 |
| ENSG00000184905 | TCEAL2     | 6.148  | -0.451 | 0.731 | 2.87E-07 | 7.79E-06 |
| ENSG00000071967 | CYBRD1     | 8.842  | -0.445 | 0.734 | 2.88E-07 | 7.80E-06 |
| ENSG00000169239 | CA5B       | 6.370  | 0.555  | 1.469 | 2.89E-07 | 7.82E-06 |
| ENSG00000100380 | ST13       | 7.362  | -0.314 | 0.804 | 2.90E-07 | 7.82E-06 |
| ENSG00000154175 | ABI3BP     | 9.702  | 0.923  | 1.896 | 2.92E-07 | 7.84E-06 |
| ENSG00000185532 | PRKG1      | 4.340  | -0.879 | 0.544 | 2.93E-07 | 7.84E-06 |
| ENSG00000104936 | DMPK       | 4.816  | 0.419  | 1.337 | 2.93E-07 | 7.84E-06 |
| ENSG00000273131 |            | 3.572  | -0.439 | 0.738 | 2.95E-07 | 7.88E-06 |
| ENSG00000169071 | ROR2       | 5.057  | -0.672 | 0.628 | 2.96E-07 | 7.88E-06 |
| ENSG00000269996 |            | 3.217  | -0.396 | 0.760 | 2.98E-07 | 7.91E-06 |
| ENSG00000047634 | SCML1      | 3.733  | -0.554 | 0.681 | 3.00E-07 | 7.95E-06 |
| ENSG00000237424 | FOXD2-AS1  | 2.920  | -0.510 | 0.702 | 3.01E-07 | 7.96E-06 |
| ENSG00000105357 | MYH14      | 3.193  | -0.935 | 0.523 | 3.07E-07 | 8.10E-06 |
| ENSG00000102225 | CDK16      | 5.868  | 0.268  | 1.204 | 3.10E-07 | 8.16E-06 |
| ENSG00000205356 | TECPR1     | 3.749  | 0.366  | 1.289 | 3.30E-07 | 8.65E-06 |
| ENSG00000142303 | ADAMTS10   | 4.294  | 0.500  | 1.415 | 3.36E-07 | 8.79E-06 |
| ENSG00000134748 | PRPF38A    | 5.078  | -0.298 | 0.813 | 3.51E-07 | 9.17E-06 |
| ENSG00000185803 | SLC52A2    | 4.368  | 0.587  | 1.503 | 3.54E-07 | 9.21E-06 |
| ENSG00000081189 | MEF2C      | 5.525  | -0.520 | 0.697 | 3.57E-07 | 9.27E-06 |
| ENSG00000143344 | RGL1       | 4.826  | -0.620 | 0.651 | 3.58E-07 | 9.27E-06 |
| ENSG00000141582 | CBX4       | 3.706  | 0.357  | 1.280 | 3.59E-07 | 9.27E-06 |
| ENSG00000133195 | SLC39A11   | 3.723  | -0.520 | 0.698 | 3.62E-07 | 9.34E-06 |
| ENSG00000186310 | NAP1L3     | 4.367  | -0.416 | 0.749 | 3.64E-07 | 9.37E-06 |
| ENSG00000110697 | PITPNM1    | 5.079  | 0.368  | 1.291 | 3.68E-07 | 9.45E-06 |
| ENSG00000146281 | PM20D2     | 4.211  | -0.613 | 0.654 | 3.76E-07 | 9.63E-06 |
| ENSG00000082497 | SERTAD4    | 6.707  | -0.544 | 0.686 | 3.79E-07 | 9.68E-06 |
| ENSG00000178425 | NT5DC1     | 4.538  | -0.371 | 0.773 | 3.80E-07 | 9.68E-06 |
| ENSG00000035664 | DAPK2      | 2.966  | -0.636 | 0.644 | 3.96E-07 | 1.01E-05 |
| ENSG00000087253 | LPCAT2     | 2.933  | -0.944 | 0.520 | 3.98E-07 | 1.01E-05 |



|                 |             |        |        |       |          |          |
|-----------------|-------------|--------|--------|-------|----------|----------|
| ENSG00000244731 | C4A         | 4.035  | -0.903 | 0.535 | 3.99E-07 | 1.01E-05 |
| ENSG00000188015 | S100A3      | 3.228  | 1.179  | 2.265 | 4.16E-07 | 1.05E-05 |
| ENSG00000152931 | PART1       | 5.427  | 0.724  | 1.652 | 4.19E-07 | 1.05E-05 |
| ENSG00000150593 | PDCD4       | 6.107  | -0.394 | 0.761 | 4.20E-07 | 1.06E-05 |
| ENSG00000106105 | GARS        | 6.254  | 0.437  | 1.354 | 4.24E-07 | 1.06E-05 |
| ENSG00000119686 | FLVCR2      | 2.718  | -0.729 | 0.603 | 4.25E-07 | 1.06E-05 |
| ENSG00000163485 | ADORA1      | 4.280  | 0.729  | 1.657 | 4.39E-07 | 1.09E-05 |
| ENSG00000115310 | RTN4        | 7.624  | 0.322  | 1.250 | 4.39E-07 | 1.09E-05 |
| ENSG00000109089 | CDR2L       | 3.691  | 0.487  | 1.402 | 4.39E-07 | 1.09E-05 |
| ENSG00000156453 | PCDH1       | 3.014  | 1.218  | 2.327 | 4.40E-07 | 1.09E-05 |
| ENSG00000204128 | C2orf72     | 2.607  | -0.738 | 0.599 | 4.44E-07 | 1.10E-05 |
| ENSG00000066697 | MSANTD3     | 3.640  | 0.537  | 1.451 | 4.51E-07 | 1.11E-05 |
| ENSG00000011028 | MRC2        | 9.419  | 0.404  | 1.324 | 4.54E-07 | 1.11E-05 |
| ENSG00000256995 |             | 2.626  | -1.307 | 0.404 | 4.54E-07 | 1.11E-05 |
| ENSG00000171067 | C11orf24    | 6.051  | 0.455  | 1.371 | 4.68E-07 | 1.15E-05 |
| ENSG00000106397 | PLOD3       | 5.760  | 0.377  | 1.299 | 4.80E-07 | 1.17E-05 |
| ENSG00000164309 | CMYA5       | 3.854  | -1.178 | 0.442 | 4.88E-07 | 1.19E-05 |
| ENSG00000113209 | PCDHB5      | 2.808  | -0.561 | 0.678 | 4.91E-07 | 1.19E-05 |
| ENSG00000132470 | ITGB4       | 4.122  | 0.867  | 1.823 | 4.98E-07 | 1.21E-05 |
| ENSG00000162337 | LRP5        | 4.688  | -0.605 | 0.658 | 5.08E-07 | 1.23E-05 |
| ENSG00000182903 | ZNF721      | 3.993  | -0.421 | 0.747 | 5.21E-07 | 1.26E-05 |
| ENSG00000164118 | CEP44       | 3.821  | -0.375 | 0.771 | 5.29E-07 | 1.27E-05 |
| ENSG00000112378 | PERP        | 5.249  | 0.464  | 1.380 | 5.43E-07 | 1.30E-05 |
| ENSG00000147642 | SYBU        | 5.238  | 0.467  | 1.382 | 5.61E-07 | 1.34E-05 |
| ENSG00000175866 | BAIAP2      | 5.386  | 0.439  | 1.356 | 5.61E-07 | 1.34E-05 |
| ENSG00000134830 | C5AR2       | 4.384  | 0.478  | 1.393 | 6.13E-07 | 1.46E-05 |
| ENSG00000142002 | DPP9        | 4.554  | 0.291  | 1.223 | 6.17E-07 | 1.47E-05 |
| ENSG00000114166 | KAT2B       | 5.115  | -0.517 | 0.699 | 6.36E-07 | 1.51E-05 |
| ENSG00000111186 | WNT5B       | 4.523  | 0.933  | 1.910 | 6.37E-07 | 1.51E-05 |
| ENSG00000132680 | KIAA0907    | 4.936  | -0.466 | 0.724 | 6.77E-07 | 1.60E-05 |
| ENSG00000153815 | CMIP        | 5.186  | 0.651  | 1.570 | 6.93E-07 | 1.63E-05 |
| ENSG00000065833 | ME1         | 4.134  | -0.471 | 0.722 | 7.06E-07 | 1.66E-05 |
| ENSG00000206573 | THUMPD3-AS1 | 3.672  | -0.494 | 0.710 | 7.12E-07 | 1.67E-05 |
| ENSG00000130702 | LAMA5       | 3.750  | 0.948  | 1.930 | 7.14E-07 | 1.67E-05 |
| ENSG00000105866 | SP4         | 3.945  | -0.514 | 0.700 | 7.26E-07 | 1.70E-05 |
| ENSG00000197841 | ZNF181      | 3.835  | -0.439 | 0.738 | 7.45E-07 | 1.73E-05 |
| ENSG00000120149 | MSX2        | 2.756  | 1.682  | 3.208 | 7.46E-07 | 1.73E-05 |
| ENSG00000159650 | UROC1       | 3.921  | 1.189  | 2.280 | 7.50E-07 | 1.74E-05 |
| ENSG00000173198 | CYSLTR1     | 2.822  | -1.045 | 0.485 | 7.88E-07 | 1.83E-05 |
| ENSG00000113739 | STC2        | 7.695  | -1.052 | 0.482 | 8.08E-07 | 1.87E-05 |
| ENSG00000120659 | TNFSF11     | 5.135  | 1.161  | 2.235 | 8.10E-07 | 1.87E-05 |
| ENSG00000118785 | SPP1        | 9.512  | 1.735  | 3.328 | 8.21E-07 | 1.89E-05 |
| ENSG00000113328 | CCNG1       | 5.263  | -0.341 | 0.789 | 8.27E-07 | 1.90E-05 |
| ENSG00000100234 | TIMP3       | 9.604  | 0.758  | 1.692 | 8.67E-07 | 1.99E-05 |
| ENSG00000241839 | PLEKHO2     | 5.259  | -0.457 | 0.729 | 8.86E-07 | 2.02E-05 |
| ENSG00000164237 | CMBL        | 3.848  | -0.350 | 0.785 | 8.86E-07 | 2.02E-05 |
| ENSG00000130635 | COL5A1      | 10.637 | 0.847  | 1.798 | 9.00E-07 | 2.05E-05 |
| ENSG00000130529 | TRPM4       | 3.508  | 0.663  | 1.583 | 9.01E-07 | 2.05E-05 |
| ENSG00000183578 | TNFAIP8L3   | 3.549  | 0.372  | 1.294 | 9.15E-07 | 2.07E-05 |
| ENSG00000122707 | RECK        | 5.344  | -0.438 | 0.738 | 9.19E-07 | 2.08E-05 |
| ENSG00000106992 | AK1         | 5.276  | 0.562  | 1.476 | 9.40E-07 | 2.12E-05 |
| ENSG00000236609 | ZNF853      | 4.482  | -0.356 | 0.781 | 9.40E-07 | 2.12E-05 |

|                 |           |        |        |       |          |          |
|-----------------|-----------|--------|--------|-------|----------|----------|
| ENSG00000117289 |           | 8.004  | -0.601 | 0.659 | 9.45E-07 | 2.12E-05 |
| ENSG00000159307 | SCUBE1    | 7.940  | -1.318 | 0.401 | 9.54E-07 | 2.14E-05 |
| ENSG00000157240 | FZD1      | 5.621  | 0.664  | 1.584 | 9.93E-07 | 2.22E-05 |
| ENSG00000232931 | LINC00342 | 3.451  | -0.521 | 0.697 | 1.00E-06 | 2.23E-05 |
| ENSG00000132718 | SYT11     | 4.100  | 0.988  | 1.983 | 1.01E-06 | 2.25E-05 |
| ENSG00000173451 | THAP2     | 2.834  | -0.403 | 0.756 | 1.03E-06 | 2.29E-05 |
| ENSG00000225791 | TRAM2-AS1 | 3.496  | -0.407 | 0.754 | 1.03E-06 | 2.29E-05 |
| ENSG00000223960 |           | 3.105  | -0.424 | 0.745 | 1.04E-06 | 2.29E-05 |
| ENSG00000131871 | SELENOS   | 6.383  | 0.393  | 1.313 | 1.04E-06 | 2.29E-05 |
| ENSG00000103335 | PIEZO1    | 8.239  | 0.369  | 1.292 | 1.05E-06 | 2.32E-05 |
| ENSG00000121858 | TNFSF10   | 4.354  | 0.774  | 1.710 | 1.05E-06 | 2.32E-05 |
| ENSG00000157766 | ACAN      | 13.511 | -0.645 | 0.639 | 1.06E-06 | 2.33E-05 |
| ENSG00000124731 | TREM1     | 5.604  | 1.804  | 3.492 | 1.07E-06 | 2.33E-05 |
| ENSG00000214140 | PRCD      | 2.837  | -0.650 | 0.637 | 1.08E-06 | 2.36E-05 |
| ENSG00000161326 |           | 5.099  | 0.439  | 1.355 | 1.08E-06 | 2.36E-05 |
| ENSG00000171160 | MORN4     | 3.263  | -0.394 | 0.761 | 1.09E-06 | 2.38E-05 |
| ENSG00000132640 | BTBD3     | 4.035  | -0.556 | 0.680 | 1.10E-06 | 2.38E-05 |
| ENSG00000111269 | CREBL2    | 5.317  | -0.225 | 0.856 | 1.11E-06 | 2.40E-05 |
| ENSG00000118515 | SGK1      | 7.175  | 1.042  | 2.059 | 1.18E-06 | 2.55E-05 |
| ENSG00000102109 | PCSK1N    | 3.304  | 1.226  | 2.338 | 1.19E-06 | 2.56E-05 |
| ENSG00000170873 | MTSS1     | 3.060  | 1.122  | 2.177 | 1.19E-06 | 2.56E-05 |
| ENSG00000132485 | ZRANB2    | 6.825  | -0.482 | 0.716 | 1.19E-06 | 2.56E-05 |
| ENSG00000231764 | DLX6-AS1  | 4.235  | -0.723 | 0.606 | 1.20E-06 | 2.58E-05 |
| ENSG00000154122 | ANKH      | 10.014 | 0.482  | 1.396 | 1.21E-06 | 2.59E-05 |
| ENSG00000056558 | TRAF1     | 5.423  | -0.649 | 0.638 | 1.21E-06 | 2.59E-05 |
| ENSG00000102547 | CAB39L    | 6.116  | -0.394 | 0.761 | 1.21E-06 | 2.59E-05 |
| ENSG00000118257 | NRP2      | 6.562  | 0.797  | 1.738 | 1.22E-06 | 2.59E-05 |
| ENSG00000102802 | MEDAG     | 5.429  | 0.823  | 1.769 | 1.23E-06 | 2.62E-05 |
| ENSG00000104738 | MCM4      | 3.825  | 0.355  | 1.279 | 1.24E-06 | 2.62E-05 |
| ENSG00000184226 | PCDH9     | 3.105  | -0.751 | 0.594 | 1.24E-06 | 2.62E-05 |
| ENSG00000163644 | PPM1K     | 4.929  | -0.373 | 0.772 | 1.26E-06 | 2.66E-05 |
| ENSG00000125821 | DTD1      | 5.282  | 0.401  | 1.321 | 1.28E-06 | 2.69E-05 |
| ENSG00000110047 | EHD1      | 4.105  | 0.640  | 1.558 | 1.30E-06 | 2.74E-05 |
| ENSG00000188730 | VWC2      | 2.690  | 0.740  | 1.670 | 1.34E-06 | 2.81E-05 |
| ENSG00000134242 | PTPN22    | 4.653  | -0.781 | 0.582 | 1.35E-06 | 2.82E-05 |
| ENSG00000010310 | GIPR      | 3.922  | 0.975  | 1.966 | 1.37E-06 | 2.86E-05 |
| ENSG00000100139 | MICALL1   | 3.698  | 0.564  | 1.479 | 1.37E-06 | 2.86E-05 |
| ENSG00000111911 | HINT3     | 3.349  | -0.378 | 0.769 | 1.39E-06 | 2.90E-05 |
| ENSG00000167994 | RAB3IL1   | 4.584  | -0.708 | 0.612 | 1.42E-06 | 2.95E-05 |
| ENSG00000247572 | CKMT2-AS1 | 3.037  | -0.454 | 0.730 | 1.43E-06 | 2.97E-05 |
| ENSG00000182871 | COL18A1   | 5.540  | 1.109  | 2.158 | 1.44E-06 | 2.99E-05 |
| ENSG00000165475 | CRYL1     | 4.723  | -0.474 | 0.720 | 1.46E-06 | 3.01E-05 |
| ENSG00000066027 | PPP2R5A   | 5.426  | -0.324 | 0.799 | 1.49E-06 | 3.07E-05 |
| ENSG00000105281 | SLC1A5    | 6.610  | 0.438  | 1.355 | 1.50E-06 | 3.09E-05 |
| ENSG00000214548 | MEG3      | 7.438  | -0.831 | 0.562 | 1.52E-06 | 3.12E-05 |
| ENSG00000166821 | PEX11A    | 2.962  | -0.384 | 0.766 | 1.53E-06 | 3.13E-05 |
| ENSG00000092068 | SLC7A8    | 4.670  | -0.627 | 0.648 | 1.55E-06 | 3.17E-05 |
| ENSG00000161955 | TNFSF13   | 2.850  | -0.569 | 0.674 | 1.56E-06 | 3.17E-05 |
| ENSG00000180011 | ZADH2     | 4.376  | -0.351 | 0.784 | 1.57E-06 | 3.20E-05 |
| ENSG00000006747 | SCIN      | 6.778  | -0.592 | 0.663 | 1.65E-06 | 3.35E-05 |
| ENSG00000197062 | ZSCAN26   | 4.104  | -0.340 | 0.790 | 1.65E-06 | 3.35E-05 |
| ENSG00000160877 | NACC1     | 3.571  | 0.374  | 1.296 | 1.70E-06 | 3.44E-05 |

|                 |          |        |        |       |          |          |
|-----------------|----------|--------|--------|-------|----------|----------|
| ENSG00000196911 | KPNA5    | 4.056  | -0.458 | 0.728 | 1.70E-06 | 3.44E-05 |
| ENSG00000149131 | SERPING1 | 9.633  | -0.546 | 0.685 | 1.76E-06 | 3.55E-05 |
| ENSG00000165915 | SLC39A13 | 6.695  | 0.351  | 1.276 | 1.76E-06 | 3.55E-05 |
| ENSG00000187764 | SEMA4D   | 2.721  | 0.550  | 1.464 | 1.79E-06 | 3.60E-05 |
| ENSG00000179604 | CDC42EP4 | 4.875  | -0.558 | 0.679 | 1.80E-06 | 3.61E-05 |
| ENSG00000112394 | SLC16A10 | 5.083  | 0.884  | 1.846 | 1.80E-06 | 3.61E-05 |
| ENSG00000139132 | FGD4     | 2.960  | -0.703 | 0.614 | 1.81E-06 | 3.62E-05 |
| ENSG00000077942 | FBLN1    | 6.037  | -1.018 | 0.494 | 1.83E-06 | 3.64E-05 |
| ENSG00000073008 | PVR      | 4.230  | 0.422  | 1.340 | 1.88E-06 | 3.73E-05 |
| ENSG00000174851 | YIF1A    | 6.117  | 0.491  | 1.406 | 1.88E-06 | 3.74E-05 |
| ENSG00000120318 | ARAP3    | 3.147  | 0.520  | 1.434 | 1.90E-06 | 3.76E-05 |
| ENSG00000145331 | TRMT10A  | 2.850  | -0.485 | 0.715 | 1.93E-06 | 3.82E-05 |
| ENSG00000072071 | ADGRL1   | 3.897  | 0.587  | 1.503 | 1.95E-06 | 3.84E-05 |
| ENSG00000111907 | TPD52L1  | 6.445  | -0.474 | 0.720 | 1.96E-06 | 3.87E-05 |
| ENSG00000120708 | TGFBI    | 10.332 | 1.527  | 2.881 | 2.01E-06 | 3.95E-05 |
| ENSG00000071127 | WDR1     | 6.812  | 0.373  | 1.295 | 2.03E-06 | 3.99E-05 |
| ENSG00000135723 | FHOD1    | 4.555  | 0.516  | 1.430 | 2.04E-06 | 3.99E-05 |
| ENSG00000109458 | GAB1     | 4.691  | -0.685 | 0.622 | 2.05E-06 | 4.02E-05 |
| ENSG00000128274 | A4GALT   | 5.031  | 0.738  | 1.668 | 2.08E-06 | 4.05E-05 |
| ENSG00000221963 | APOL6    | 3.617  | -0.592 | 0.664 | 2.08E-06 | 4.05E-05 |
| ENSG00000152953 | STK32B   | 3.567  | -1.023 | 0.492 | 2.11E-06 | 4.10E-05 |
| ENSG00000138363 | ATIC     | 5.581  | 0.502  | 1.416 | 2.13E-06 | 4.13E-05 |
| ENSG00000141447 | OSBPL1A  | 5.096  | -0.543 | 0.686 | 2.16E-06 | 4.18E-05 |
| ENSG00000137492 | THAP12   | 4.941  | -0.265 | 0.832 | 2.17E-06 | 4.20E-05 |
| ENSG00000149380 | P4HA3    | 5.962  | 1.157  | 2.230 | 2.18E-06 | 4.22E-05 |
| ENSG00000171448 | ZBTB26   | 3.334  | -0.524 | 0.695 | 2.22E-06 | 4.26E-05 |
| ENSG00000137274 | BPHL     | 3.438  | -0.383 | 0.767 | 2.22E-06 | 4.26E-05 |
| ENSG00000111432 | FZD10    | 3.427  | 1.165  | 2.243 | 2.22E-06 | 4.26E-05 |
| ENSG00000137216 | TMEM63B  | 3.955  | 0.368  | 1.291 | 2.25E-06 | 4.31E-05 |
| ENSG00000242732 | RGAG4    | 3.709  | -0.561 | 0.678 | 2.28E-06 | 4.36E-05 |
| ENSG00000170962 | PDGFD    | 5.227  | -0.774 | 0.585 | 2.30E-06 | 4.40E-05 |
| ENSG00000104731 | KLHDC4   | 3.547  | 0.507  | 1.421 | 2.34E-06 | 4.47E-05 |
| ENSG00000148848 | ADAM12   | 5.393  | 1.304  | 2.469 | 2.39E-06 | 4.55E-05 |
| ENSG00000223561 |          | 3.378  | -1.433 | 0.370 | 2.39E-06 | 4.55E-05 |
| ENSG00000054938 | CHRD12   | 8.190  | -2.776 | 0.146 | 2.45E-06 | 4.64E-05 |
| ENSG00000197747 | S100A10  | 8.799  | 0.701  | 1.626 | 2.47E-06 | 4.67E-05 |
| ENSG00000180543 | TSPYL5   | 5.062  | -0.411 | 0.752 | 2.48E-06 | 4.69E-05 |
| ENSG00000068078 | FGFR3    | 7.264  | -0.664 | 0.631 | 2.49E-06 | 4.69E-05 |
| ENSG00000128342 | LIF      | 4.054  | 2.049  | 4.137 | 2.52E-06 | 4.74E-05 |
| ENSG00000168546 | GFRA2    | 5.255  | 1.495  | 2.818 | 2.57E-06 | 4.82E-05 |
| ENSG00000065534 | MYLK     | 4.164  | -0.990 | 0.504 | 2.57E-06 | 4.82E-05 |
| ENSG00000121064 | SCPEP1   | 6.335  | -0.327 | 0.797 | 2.65E-06 | 4.96E-05 |
| ENSG00000100321 | SYNGR1   | 4.943  | -0.391 | 0.763 | 2.70E-06 | 5.05E-05 |
| ENSG00000043039 | BARX2    | 3.519  | 0.865  | 1.821 | 2.78E-06 | 5.19E-05 |
| ENSG00000070882 | OSBPL3   | 3.778  | 0.767  | 1.701 | 2.85E-06 | 5.31E-05 |
| ENSG00000066735 | KIF26A   | 3.137  | -0.586 | 0.666 | 2.86E-06 | 5.32E-05 |
| ENSG00000064666 | CNN2     | 4.063  | -0.508 | 0.703 | 2.87E-06 | 5.32E-05 |
| ENSG00000174804 | FZD4     | 4.020  | -0.668 | 0.630 | 2.93E-06 | 5.43E-05 |
| ENSG00000114670 | NEK11    | 3.803  | -0.387 | 0.765 | 3.01E-06 | 5.57E-05 |
| ENSG00000220785 | MTMR9LP  | 3.787  | -0.582 | 0.668 | 3.03E-06 | 5.60E-05 |
| ENSG00000105426 | PTPRS    | 6.470  | -0.609 | 0.656 | 3.05E-06 | 5.62E-05 |
| ENSG00000122176 | FMOD     | 13.561 | 0.432  | 1.349 | 3.17E-06 | 5.84E-05 |

|                 |          |       |        |       |          |             |
|-----------------|----------|-------|--------|-------|----------|-------------|
| ENSG00000034152 | MAP2K3   | 5.449 | 0.408  | 1.327 | 3.24E-06 | 5.94E-05    |
| ENSG00000186684 | CYP27C1  | 5.269 | 0.584  | 1.499 | 3.40E-06 | 6.22E-05    |
| ENSG00000235750 | KIAA0040 | 7.218 | 0.507  | 1.421 | 3.41E-06 | 6.24E-05    |
| ENSG00000146352 | CLVS2    | 4.760 | 1.091  | 2.130 | 3.48E-06 | 6.35E-05    |
| ENSG00000147324 | MFHAS1   | 3.544 | -0.433 | 0.741 | 3.49E-06 | 6.36E-05    |
| ENSG00000095321 | CRAT     | 5.736 | 0.334  | 1.261 | 3.50E-06 | 6.36E-05    |
| ENSG00000204381 | LAYN     | 3.992 | -0.512 | 0.701 | 3.50E-06 | 6.36E-05    |
| ENSG00000006071 | ABCC8    | 2.960 | -0.916 | 0.530 | 3.51E-06 | 6.37E-05    |
| ENSG00000099377 | HSD3B7   | 5.747 | 0.981  | 1.974 | 3.52E-06 | 6.37E-05    |
| ENSG00000111605 | CPSF6    | 5.416 | -0.348 | 0.786 | 3.52E-06 | 6.37E-05    |
| ENSG00000028528 | SNX1     | 6.275 | -0.301 | 0.812 | 3.64E-06 | 6.56E-05    |
| ENSG00000176014 | TUBB6    | 6.083 | 0.578  | 1.493 | 3.66E-06 | 6.59E-05    |
| ENSG00000174032 | SLC25A30 | 3.736 | -0.470 | 0.722 | 3.71E-06 | 6.67E-05    |
| ENSG00000016391 | CHDH     | 4.231 | -0.638 | 0.642 | 3.71E-06 | 6.67E-05    |
| ENSG00000076356 | PLXNA2   | 4.879 | 0.822  | 1.768 | 3.78E-06 | 6.77E-05    |
| ENSG00000125730 | C3       | 3.389 | -2.229 | 0.213 | 3.79E-06 | 6.77E-05    |
| ENSG00000197620 | CXorf40A | 3.101 | 0.400  | 1.319 | 3.85E-06 | 6.87E-05    |
| ENSG00000064042 | LIMCH1   | 7.152 | -0.633 | 0.645 | 3.90E-06 | 6.95E-05    |
| ENSG00000136111 | TBC1D4   | 4.566 | -0.561 | 0.678 | 3.91E-06 | 6.95E-05    |
| ENSG00000101294 | HM13     | 6.961 | 0.414  | 1.332 | 4.01E-06 | 7.13E-05    |
| ENSG00000121075 | TBX4     | 4.869 | -0.721 | 0.607 | 4.02E-06 | 7.14E-05    |
| ENSG00000172748 | ZNF596   | 2.721 | -0.418 | 0.749 | 4.07E-06 | 7.21E-05    |
| ENSG00000120915 | EPHX2    | 4.815 | -0.407 | 0.754 | 4.09E-06 | 7.23E-05    |
| ENSG00000115641 | FHL2     | 4.188 | 0.773  | 1.708 | 4.18E-06 | 7.38E-05    |
| ENSG00000164039 | BDH2     | 5.055 | -0.407 | 0.754 | 4.20E-06 | 7.40E-05    |
| ENSG00000198932 | GPRASP1  | 6.123 | -0.586 | 0.666 | 4.23E-06 | 7.43E-05    |
| ENSG00000198742 | SMURF1   | 3.830 | 0.617  | 1.534 | 4.37E-06 | 7.68E-05    |
| ENSG00000175356 | SCUBE2   | 4.130 | -0.685 | 0.622 | 4.39E-06 | 7.69E-05    |
| ENSG00000115295 | CLIP4    | 3.334 | -0.418 | 0.748 | 4.41E-06 | 7.71E-05    |
| ENSG00000152558 | TMEM123  | 5.780 | -0.298 | 0.814 | 4.58E-06 | 8.01E-05    |
| ENSG00000148344 | PTGES    | 4.042 | 1.492  | 2.812 | 4.61E-06 | 8.05E-05    |
| ENSG00000143149 | ALDH9A1  | 4.521 | -0.358 | 0.780 | 4.68E-06 | 8.16E-05    |
| ENSG00000138604 | GLCE     | 3.848 | -0.414 | 0.750 | 4.78E-06 | 8.30E-05    |
| ENSG00000113719 | ERGIC1   | 7.372 | 0.339  | 1.265 | 4.78E-06 | 8.30E-05    |
| ENSG00000005059 | MCUB     | 4.010 | 0.551  | 1.465 | 4.90E-06 | 8.49E-05    |
| ENSG00000077274 | CAPN6    | 3.751 | -1.835 | 0.280 | 5.09E-06 | 8.80E-05    |
| ENSG00000075035 | WSCD2    | 6.681 | -0.567 | 0.675 | 5.18E-06 | 8.95E-05    |
| ENSG00000151690 | MFSD6    | 2.906 | 0.680  | 1.602 | 5.29E-06 | 9.12E-05    |
| ENSG00000079482 | OPHN1    | 4.211 | -0.858 | 0.552 | 5.30E-06 | 9.13E-05    |
| ENSG00000138744 | NAAA     | 4.857 | -0.376 | 0.771 | 5.33E-06 | 9.16E-05    |
| ENSG00000099139 | PCSK5    | 3.541 | 0.533  | 1.447 | 5.38E-06 | 9.23E-05    |
| ENSG00000107984 | DKK1     | 3.538 | -1.299 | 0.406 | 5.41E-06 | 9.26E-05    |
| ENSG00000103966 | EHD4     | 3.663 | 0.640  | 1.559 | 5.41E-06 | 9.26E-05    |
| ENSG00000077514 | POLD3    | 3.618 | -0.346 | 0.787 | 5.42E-06 | 9.26E-05    |
| ENSG00000144649 | FAM198A  | 3.507 | -1.125 | 0.458 | 5.49E-06 | 9.36E-05    |
| ENSG00000166292 | TMEM100  | 4.723 | 0.616  | 1.533 | 5.56E-06 | 9.46E-05    |
| ENSG00000165434 | PGM2L1   | 4.552 | 0.861  | 1.816 | 5.63E-06 | 9.57E-05    |
| ENSG00000179222 | MAGED1   | 8.345 | 0.317  | 1.245 | 5.78E-06 | 9.80E-05    |
| ENSG00000186417 | GLDN     | 6.158 | -0.522 | 0.697 | 5.97E-06 | 0.000101204 |
| ENSG00000164062 | APEH     | 5.419 | 0.384  | 1.305 | 5.98E-06 | 0.000101205 |
| ENSG00000188522 | FAM83G   | 3.656 | 0.674  | 1.596 | 6.01E-06 | 0.000101278 |
| ENSG00000175567 | UCP2     | 4.039 | 0.908  | 1.877 | 6.01E-06 | 0.000101278 |

|                 |           |        |        |       |          |             |
|-----------------|-----------|--------|--------|-------|----------|-------------|
| ENSG00000115107 | STEAP3    | 7.604  | 0.333  | 1.260 | 6.02E-06 | 0.000101278 |
| ENSG00000197320 |           | 3.523  | -1.618 | 0.326 | 6.19E-06 | 0.000103988 |
| ENSG00000156050 | FAM161B   | 2.770  | -0.435 | 0.740 | 6.20E-06 | 0.000103988 |
| ENSG00000075223 | SEMA3C    | 5.791  | 0.890  | 1.854 | 6.22E-06 | 0.000103988 |
| ENSG00000132424 | PNISR     | 7.286  | -0.514 | 0.700 | 6.22E-06 | 0.000103988 |
| ENSG00000160145 | KALRN     | 4.638  | 0.560  | 1.474 | 6.25E-06 | 0.000104355 |
| ENSG00000164591 | MYOZ3     | 3.374  | -1.172 | 0.444 | 6.31E-06 | 0.000105094 |
| ENSG00000107438 | PDLIM1    | 3.698  | 1.384  | 2.610 | 6.31E-06 | 0.000105094 |
| ENSG00000106524 | ANKMY2    | 4.177  | -0.278 | 0.825 | 6.34E-06 | 0.00010527  |
| ENSG00000144645 | OSBPL10   | 5.171  | 0.406  | 1.325 | 6.39E-06 | 0.000106009 |
| ENSG00000184515 | BEX5      | 2.981  | -0.662 | 0.632 | 6.41E-06 | 0.000106152 |
| ENSG00000173757 | STAT5B    | 6.203  | -0.344 | 0.788 | 6.57E-06 | 0.000108583 |
| ENSG00000132481 | TRIM47    | 5.843  | 0.531  | 1.445 | 6.65E-06 | 0.000109772 |
| ENSG00000179954 | SSC5D     | 6.934  | 0.658  | 1.578 | 6.75E-06 | 0.000111248 |
| ENSG00000104415 | WISP1     | 4.731  | 1.132  | 2.191 | 6.80E-06 | 0.000111986 |
| ENSG00000168734 | PKIG      | 5.859  | 0.451  | 1.367 | 6.86E-06 | 0.000112772 |
| ENSG00000120798 | NR2C1     | 4.738  | -0.334 | 0.793 | 6.91E-06 | 0.000113369 |
| ENSG00000188783 | PRELP     | 12.910 | 0.545  | 1.459 | 6.92E-06 | 0.000113376 |
| ENSG00000134369 | NAV1      | 6.360  | 0.543  | 1.457 | 6.99E-06 | 0.000114262 |
| ENSG00000127951 | FGL2      | 3.220  | -0.986 | 0.505 | 7.01E-06 | 0.000114451 |
| ENSG00000221886 | ZBED8     | 3.035  | -0.576 | 0.671 | 7.02E-06 | 0.000114451 |
| ENSG00000116871 | MAP7D1    | 5.484  | 0.409  | 1.328 | 7.06E-06 | 0.000114914 |
| ENSG00000158270 | COLEC12   | 7.891  | -0.800 | 0.574 | 7.12E-06 | 0.00011547  |
| ENSG00000173692 | PSMD1     | 5.875  | 0.324  | 1.252 | 7.13E-06 | 0.00011547  |
| ENSG00000035115 | SH3YL1    | 4.720  | -0.307 | 0.808 | 7.13E-06 | 0.00011547  |
| ENSG00000176619 | LMNB2     | 4.277  | 0.415  | 1.333 | 7.24E-06 | 0.000117101 |
| ENSG00000185950 | IRS2      | 3.515  | -0.406 | 0.755 | 7.27E-06 | 0.000117432 |
| ENSG00000099219 | ERMP1     | 4.920  | -0.659 | 0.633 | 7.36E-06 | 0.000118744 |
| ENSG00000188763 | FZD9      | 4.998  | -0.529 | 0.693 | 7.38E-06 | 0.00011881  |
| ENSG00000163596 | ICA1L     | 3.506  | -0.596 | 0.661 | 7.48E-06 | 0.000120305 |
| ENSG00000204248 | COL11A2   | 11.353 | -0.891 | 0.539 | 7.51E-06 | 0.000120588 |
| ENSG00000121900 | TMEM54    | 4.308  | 0.750  | 1.682 | 7.56E-06 | 0.000121224 |
| ENSG00000059145 | UNKL      | 3.860  | -0.313 | 0.805 | 7.58E-06 | 0.000121269 |
| ENSG00000198556 | ZNF789    | 3.416  | -0.371 | 0.773 | 7.65E-06 | 0.000122128 |
| ENSG00000184216 | IRAK1     | 5.675  | 0.395  | 1.315 | 7.65E-06 | 0.000122128 |
| ENSG00000103855 | CD276     | 6.955  | 0.575  | 1.490 | 7.70E-06 | 0.000122755 |
| ENSG00000180769 | WDFY3-AS2 | 3.296  | -0.398 | 0.759 | 7.75E-06 | 0.000123243 |
| ENSG00000106070 | GRB10     | 4.914  | 0.582  | 1.497 | 7.77E-06 | 0.000123444 |
| ENSG00000126947 | ARMCX1    | 4.954  | -0.366 | 0.776 | 7.81E-06 | 0.000123673 |
| ENSG00000254986 | DPP3      | 3.315  | 0.326  | 1.253 | 7.81E-06 | 0.000123673 |
| ENSG00000204394 | VAR5      | 5.003  | 0.364  | 1.287 | 7.91E-06 | 0.000125045 |
| ENSG00000038427 | VCAN      | 7.046  | 1.024  | 2.034 | 8.08E-06 | 0.000127297 |
| ENSG00000257923 | CUX1      | 6.785  | 0.292  | 1.224 | 8.09E-06 | 0.000127297 |
| ENSG00000100596 | SPTLC2    | 4.526  | 0.492  | 1.407 | 8.09E-06 | 0.000127297 |
| ENSG00000176845 | METRNL    | 5.640  | 0.723  | 1.651 | 8.10E-06 | 0.000127297 |
| ENSG00000260563 |           | 3.009  | -0.734 | 0.601 | 8.31E-06 | 0.000130392 |
| ENSG00000006007 | GDE1      | 4.751  | 0.367  | 1.289 | 8.34E-06 | 0.000130666 |
| ENSG00000169169 | CPT1C     | 4.022  | 0.433  | 1.350 | 8.35E-06 | 0.000130711 |
| ENSG00000050165 | DKK3      | 8.188  | 0.935  | 1.911 | 8.38E-06 | 0.000130955 |
| ENSG00000101665 | SMAD7     | 5.000  | 0.395  | 1.314 | 8.51E-06 | 0.00013271  |
| ENSG00000177370 | TIMM22    | 4.050  | 0.337  | 1.263 | 8.53E-06 | 0.000132866 |
| ENSG00000137103 | TMEM8B    | 4.746  | -0.400 | 0.758 | 8.55E-06 | 0.000132996 |

|                 |           |        |        |       |          |             |
|-----------------|-----------|--------|--------|-------|----------|-------------|
| ENSG00000178209 | PLEC      | 8.808  | 0.424  | 1.341 | 8.56E-06 | 0.00013302  |
| ENSG00000179981 | TSHZ1     | 4.620  | -0.495 | 0.710 | 8.78E-06 | 0.000136161 |
| ENSG00000178222 | RNF212    | 3.169  | -0.381 | 0.768 | 8.93E-06 | 0.000138242 |
| ENSG00000150687 | PRSS23    | 6.790  | 0.842  | 1.793 | 9.03E-06 | 0.000139562 |
| ENSG00000153721 | CNKS3     | 3.382  | -0.789 | 0.579 | 9.04E-06 | 0.000139562 |
| ENSG00000090520 | DNAJB11   | 6.124  | 0.423  | 1.341 | 9.06E-06 | 0.000139698 |
| ENSG00000124831 | LRRFIP1   | 6.941  | 0.453  | 1.369 | 9.24E-06 | 0.000142302 |
| ENSG00000070159 | PTPN3     | 4.214  | 0.377  | 1.299 | 9.29E-06 | 0.000142748 |
| ENSG00000155755 | TMEM237   | 5.825  | -0.365 | 0.777 | 9.30E-06 | 0.000142748 |
| ENSG00000172935 | MRGPRF    | 5.017  | 0.525  | 1.439 | 9.41E-06 | 0.000144212 |
| ENSG00000182093 | WRB       | 4.682  | -0.310 | 0.807 | 9.61E-06 | 0.000147119 |
| ENSG00000134363 | FST       | 2.974  | -1.189 | 0.439 | 9.67E-06 | 0.000147821 |
| ENSG00000150867 | PIP4K2A   | 4.707  | -0.342 | 0.789 | 9.74E-06 | 0.000148594 |
| ENSG00000183762 | KREMEN1   | 6.007  | 0.620  | 1.537 | 9.79E-06 | 0.000148899 |
| ENSG00000025708 | TYMP      | 5.161  | 1.030  | 2.042 | 9.80E-06 | 0.000148899 |
| ENSG00000166963 | MAP1A     | 5.419  | 0.821  | 1.767 | 9.80E-06 | 0.000148899 |
| ENSG00000159842 | ABR       | 6.745  | 0.363  | 1.286 | 9.83E-06 | 0.000149089 |
| ENSG00000176834 | VSIG10    | 3.845  | -0.407 | 0.754 | 9.89E-06 | 0.000149821 |
| ENSG00000141337 | ARSG      | 3.348  | -0.455 | 0.730 | 1.00E-05 | 0.000151293 |
| ENSG00000139597 | N4BP2L1   | 3.371  | -0.474 | 0.720 | 1.00E-05 | 0.000151293 |
| ENSG00000178567 | EPM2AIP1  | 5.314  | -0.413 | 0.751 | 1.02E-05 | 0.000153865 |
| ENSG00000144331 | ZNF385B   | 4.900  | -0.596 | 0.661 | 1.03E-05 | 0.000154806 |
| ENSG00000105880 | DLX5      | 5.489  | -0.609 | 0.656 | 1.04E-05 | 0.000156765 |
| ENSG00000084444 | FAM234B   | 3.231  | -0.617 | 0.652 | 1.05E-05 | 0.000157107 |
| ENSG00000108479 | GALK1     | 4.464  | 0.649  | 1.568 | 1.05E-05 | 0.000157883 |
| ENSG00000180626 | ZNF594    | 2.950  | -0.551 | 0.683 | 1.05E-05 | 0.000157883 |
| ENSG00000069702 | TGFBR3    | 6.952  | -0.482 | 0.716 | 1.08E-05 | 0.00016083  |
| ENSG00000026950 | BTN3A1    | 3.554  | -0.717 | 0.609 | 1.08E-05 | 0.00016083  |
| ENSG00000109184 | DCUN1D4   | 5.000  | -0.338 | 0.791 | 1.10E-05 | 0.000163347 |
| ENSG00000187583 | PLEKHN1   | 2.684  | 0.423  | 1.340 | 1.10E-05 | 0.00016365  |
| ENSG00000089335 | ZNF302    | 5.175  | -0.374 | 0.772 | 1.11E-05 | 0.000165049 |
| ENSG00000235194 | PPP1R3E   | 3.419  | -0.494 | 0.710 | 1.12E-05 | 0.000166428 |
| ENSG00000081818 | PCDHB4    | 3.926  | -0.578 | 0.670 | 1.12E-05 | 0.000166428 |
| ENSG00000138495 | COX17     | 4.555  | 0.588  | 1.503 | 1.14E-05 | 0.000168452 |
| ENSG00000227036 | LINC00511 | 3.807  | 0.570  | 1.484 | 1.14E-05 | 0.000169006 |
| ENSG00000253676 | TAGLN2P1  | 3.658  | 0.739  | 1.669 | 1.15E-05 | 0.000170141 |
| ENSG00000164116 | GUCY1A3   | 2.557  | -1.476 | 0.360 | 1.16E-05 | 0.000170322 |
| ENSG00000090339 | ICAM1     | 5.162  | -0.604 | 0.658 | 1.16E-05 | 0.000170493 |
| ENSG00000110400 | NECTIN1   | 2.962  | 0.540  | 1.454 | 1.18E-05 | 0.000173136 |
| ENSG00000117616 | RSRP1     | 5.789  | -0.352 | 0.784 | 1.19E-05 | 0.000175083 |
| ENSG00000197928 | ZNF677    | 3.149  | -0.427 | 0.744 | 1.20E-05 | 0.000176305 |
| ENSG00000197956 | S100A6    | 10.034 | 0.824  | 1.770 | 1.22E-05 | 0.000178582 |
| ENSG00000150967 | ABCB9     | 2.652  | -0.469 | 0.722 | 1.23E-05 | 0.000179648 |
| ENSG00000153823 | PID1      | 7.252  | 0.597  | 1.513 | 1.24E-05 | 0.000180675 |
| ENSG00000204520 | MICA      | 4.749  | 0.371  | 1.294 | 1.24E-05 | 0.000180675 |
| ENSG00000166923 | GREM1     | 8.329  | -1.717 | 0.304 | 1.24E-05 | 0.000180675 |
| ENSG00000196154 | S100A4    | 9.239  | 1.205  | 2.305 | 1.25E-05 | 0.000181197 |
| ENSG00000162623 | TYW3      | 4.826  | -0.291 | 0.817 | 1.25E-05 | 0.000181542 |
| ENSG00000133111 | RFXAP     | 2.716  | -0.325 | 0.798 | 1.25E-05 | 0.000181858 |
| ENSG00000125170 | DOK4      | 4.977  | 0.312  | 1.242 | 1.29E-05 | 0.000186628 |
| ENSG00000138434 | SSFA2     | 6.092  | -0.615 | 0.653 | 1.30E-05 | 0.000187374 |
| ENSG00000158156 | XKR8      | 3.982  | 0.362  | 1.285 | 1.33E-05 | 0.000191503 |

|                 |           |        |        |       |          |             |
|-----------------|-----------|--------|--------|-------|----------|-------------|
| ENSG00000189060 | H1FO      | 7.458  | 0.437  | 1.353 | 1.33E-05 | 0.000191511 |
| ENSG00000100077 | GRK3      | 3.085  | -0.509 | 0.703 | 1.34E-05 | 0.000193148 |
| ENSG00000058262 | SEC61A1   | 8.205  | 0.269  | 1.205 | 1.34E-05 | 0.000193148 |
| ENSG00000163565 | IFI16     | 5.622  | -0.318 | 0.802 | 1.35E-05 | 0.000193567 |
| ENSG00000100528 | CNIH1     | 6.313  | 0.354  | 1.278 | 1.38E-05 | 0.000197993 |
| ENSG00000106688 | SLC1A1    | 4.935  | 0.442  | 1.358 | 1.38E-05 | 0.000197993 |
| ENSG00000198105 | ZNF248    | 4.096  | -0.323 | 0.799 | 1.38E-05 | 0.000198058 |
| ENSG00000106799 | TGFBR1    | 7.193  | 0.545  | 1.459 | 1.44E-05 | 0.000206259 |
| ENSG00000135148 | TRAFD1    | 4.979  | 0.261  | 1.198 | 1.46E-05 | 0.000208189 |
| ENSG00000272734 | ADIRF-AS1 | 3.269  | -0.544 | 0.686 | 1.50E-05 | 0.000213345 |
| ENSG00000178882 | RFLNA     | 3.691  | -0.921 | 0.528 | 1.53E-05 | 0.000217052 |
| ENSG00000205710 | C17orf107 | 2.852  | -0.627 | 0.647 | 1.53E-05 | 0.000217908 |
| ENSG00000237943 | PRKCQ-AS1 | 2.954  | -0.387 | 0.765 | 1.55E-05 | 0.000218985 |
| ENSG00000072042 | RDH11     | 5.776  | 0.336  | 1.262 | 1.55E-05 | 0.000218985 |
| ENSG00000164484 | TMEM200A  | 2.748  | 1.100  | 2.143 | 1.55E-05 | 0.000218985 |
| ENSG00000110719 | TCIRG1    | 5.768  | 0.449  | 1.365 | 1.58E-05 | 0.000222785 |
| ENSG00000105771 | SMG9      | 4.610  | 0.438  | 1.354 | 1.58E-05 | 0.000223285 |
| ENSG00000180900 | SCRIB     | 4.516  | 0.319  | 1.248 | 1.59E-05 | 0.000223285 |
| ENSG00000135048 | TMEM2     | 6.070  | -0.611 | 0.655 | 1.59E-05 | 0.000223285 |
| ENSG00000054598 | FOXC1     | 7.670  | -0.389 | 0.764 | 1.60E-05 | 0.000224823 |
| ENSG00000154358 | OBSCN     | 5.313  | -0.609 | 0.656 | 1.60E-05 | 0.000224874 |
| ENSG00000099785 | MARCH2    | 3.596  | 0.661  | 1.581 | 1.61E-05 | 0.000226168 |
| ENSG00000117114 | ADGRL2    | 3.527  | -0.817 | 0.568 | 1.62E-05 | 0.00022618  |
| ENSG00000085377 | PREP      | 4.133  | 0.278  | 1.212 | 1.62E-05 | 0.00022628  |
| ENSG00000179406 | LINC00174 | 2.906  | -0.557 | 0.680 | 1.64E-05 | 0.000228352 |
| ENSG00000182054 | IDH2      | 4.891  | 0.399  | 1.319 | 1.64E-05 | 0.000229205 |
| ENSG00000126785 | RHOJ      | 5.494  | -0.370 | 0.774 | 1.65E-05 | 0.000230192 |
| ENSG00000064601 | CTSA      | 6.496  | 0.435  | 1.352 | 1.67E-05 | 0.000232271 |
| ENSG00000170891 | CYTL1     | 10.760 | -0.748 | 0.595 | 1.69E-05 | 0.000234314 |
| ENSG00000109445 | ZNF330    | 4.313  | -0.266 | 0.832 | 1.71E-05 | 0.000237214 |
| ENSG00000141526 | SLC16A3   | 6.908  | 0.504  | 1.418 | 1.72E-05 | 0.000238802 |
| ENSG00000148175 | STOM      | 6.446  | -0.363 | 0.778 | 1.75E-05 | 0.00024147  |
| ENSG00000067141 | NEO1      | 5.774  | -0.521 | 0.697 | 1.75E-05 | 0.00024147  |
| ENSG00000076351 | SLC46A1   | 3.243  | -0.347 | 0.786 | 1.75E-05 | 0.000241754 |
| ENSG00000173917 | HOXB2     | 2.961  | 1.399  | 2.637 | 1.76E-05 | 0.000242068 |
| ENSG00000155265 | GOLGA7B   | 3.335  | 0.964  | 1.951 | 1.78E-05 | 0.000244849 |
| ENSG00000071991 | CDH19     | 4.166  | 0.853  | 1.806 | 1.78E-05 | 0.000244895 |
| ENSG00000127990 | SGCE      | 4.516  | -0.476 | 0.719 | 1.80E-05 | 0.00024706  |
| ENSG00000103528 | SYT17     | 2.742  | 0.344  | 1.269 | 1.84E-05 | 0.000252723 |
| ENSG00000157557 | ETS2      | 6.119  | -0.457 | 0.728 | 1.85E-05 | 0.00025344  |
| ENSG00000100266 | PACSIN2   | 6.932  | 0.311  | 1.241 | 1.88E-05 | 0.000257405 |
| ENSG00000116685 | KIAA2013  | 5.695  | 0.384  | 1.305 | 1.92E-05 | 0.000262582 |
| ENSG00000163743 | RCHY1     | 3.668  | -0.395 | 0.760 | 1.94E-05 | 0.000263808 |
| ENSG00000108091 | CCDC6     | 5.865  | 0.328  | 1.256 | 1.95E-05 | 0.000265497 |
| ENSG00000186153 | WVOX      | 3.529  | -0.399 | 0.758 | 1.96E-05 | 0.000266404 |
| ENSG00000010256 | UQCRC1    | 6.152  | 0.481  | 1.395 | 1.96E-05 | 0.000266486 |
| ENSG00000089006 | SNX5      | 6.173  | -0.250 | 0.841 | 1.98E-05 | 0.000268491 |
| ENSG00000166816 | LDHD      | 3.069  | -0.601 | 0.659 | 1.98E-05 | 0.000268491 |
| ENSG00000135525 | MAP7      | 2.698  | 0.511  | 1.425 | 1.99E-05 | 0.000268776 |
| ENSG00000196268 | ZNF493    | 3.391  | -0.577 | 0.670 | 2.03E-05 | 0.000273747 |
| ENSG00000173846 | PLK3      | 4.209  | 0.587  | 1.502 | 2.04E-05 | 0.000275155 |
| ENSG00000162777 | DENND2D   | 3.572  | -0.450 | 0.732 | 2.05E-05 | 0.000276463 |

|                 |          |       |        |       |          |             |
|-----------------|----------|-------|--------|-------|----------|-------------|
| ENSG00000184900 | SUMO3    | 6.180 | 0.243  | 1.184 | 2.06E-05 | 0.000277109 |
| ENSG00000111799 | COL12A1  | 9.429 | -0.820 | 0.566 | 2.06E-05 | 0.000277109 |
| ENSG00000182326 | C1S      | 9.473 | -0.536 | 0.690 | 2.07E-05 | 0.000277259 |
| ENSG00000152284 | TCF7L1   | 3.186 | -0.525 | 0.695 | 2.08E-05 | 0.000277802 |
| ENSG00000113273 | ARSB     | 4.093 | 0.471  | 1.386 | 2.08E-05 | 0.000277802 |
| ENSG00000104635 | SLC39A14 | 9.636 | 0.601  | 1.516 | 2.08E-05 | 0.000277802 |
| ENSG00000105953 | OGDH     | 6.062 | 0.260  | 1.197 | 2.09E-05 | 0.00027918  |
| ENSG00000185267 | CDNF     | 2.632 | -0.479 | 0.717 | 2.10E-05 | 0.000279499 |
| ENSG00000186470 | BTN3A2   | 3.549 | -0.550 | 0.683 | 2.10E-05 | 0.000279988 |
| ENSG00000167766 | ZNF83    | 5.977 | -0.399 | 0.758 | 2.11E-05 | 0.00028101  |
| ENSG00000142583 | SLC2A5   | 4.652 | 1.129  | 2.187 | 2.13E-05 | 0.000282345 |
| ENSG00000258297 |          | 2.751 | -0.439 | 0.738 | 2.13E-05 | 0.000282872 |
| ENSG00000112414 | ADGRG6   | 7.118 | -0.831 | 0.562 | 2.16E-05 | 0.00028613  |
| ENSG00000166402 | TUB      | 4.650 | -0.676 | 0.626 | 2.18E-05 | 0.000287664 |
| ENSG00000108848 | LUC7L3   | 7.085 | -0.360 | 0.779 | 2.18E-05 | 0.000287664 |
| ENSG00000137563 | GGH      | 3.460 | 0.442  | 1.359 | 2.18E-05 | 0.000287664 |
| ENSG00000272761 |          | 7.305 | 0.509  | 1.423 | 2.19E-05 | 0.000289015 |
| ENSG00000143061 | IGSF3    | 5.050 | 0.670  | 1.591 | 2.22E-05 | 0.000291798 |
| ENSG00000198270 | TMEM116  | 3.229 | -0.406 | 0.755 | 2.24E-05 | 0.000294198 |
| ENSG00000146833 | TRIM4    | 5.373 | -0.314 | 0.804 | 2.25E-05 | 0.000295485 |
| ENSG00000182224 | CYB5D1   | 4.230 | -0.359 | 0.780 | 2.26E-05 | 0.000296353 |
| ENSG00000173706 | HEG1     | 4.772 | 0.790  | 1.729 | 2.26E-05 | 0.000296398 |
| ENSG00000166165 | CKB      | 5.695 | 1.037  | 2.052 | 2.27E-05 | 0.000296819 |
| ENSG00000250722 | SELENOP  | 3.370 | -0.569 | 0.674 | 2.28E-05 | 0.000297494 |
| ENSG00000134824 | FADS2    | 5.951 | 0.458  | 1.374 | 2.29E-05 | 0.00029951  |
| ENSG00000105738 | SIPA1L3  | 3.843 | 0.510  | 1.424 | 2.30E-05 | 0.000300241 |
| ENSG00000077092 | RARB     | 4.646 | 0.739  | 1.669 | 2.31E-05 | 0.000300241 |
| ENSG00000106636 | YKT6     | 6.427 | 0.295  | 1.227 | 2.33E-05 | 0.000302762 |
| ENSG00000134954 | ETS1     | 6.805 | -0.536 | 0.690 | 2.33E-05 | 0.000302814 |
| ENSG00000163884 | KLF15    | 4.223 | -0.621 | 0.650 | 2.35E-05 | 0.000304664 |
| ENSG00000157680 | DGKI     | 2.895 | 1.064  | 2.090 | 2.36E-05 | 0.000305869 |
| ENSG00000066248 | NGEF     | 7.604 | 0.415  | 1.333 | 2.41E-05 | 0.000312197 |
| ENSG00000107738 | VSIR     | 6.529 | 0.379  | 1.300 | 2.42E-05 | 0.000312533 |
| ENSG00000085733 | CTTN     | 7.877 | 0.225  | 1.169 | 2.43E-05 | 0.000313083 |
| ENSG00000181026 | AEN      | 3.520 | 0.442  | 1.358 | 2.43E-05 | 0.000313816 |
| ENSG00000145349 | CAMK2D   | 5.151 | -0.368 | 0.775 | 2.46E-05 | 0.00031621  |
| ENSG00000125868 | DSTN     | 8.898 | 0.336  | 1.262 | 2.47E-05 | 0.000317272 |
| ENSG00000163659 | TIPARP   | 6.425 | -0.681 | 0.624 | 2.50E-05 | 0.000321024 |
| ENSG00000011523 | CEP68    | 3.940 | -0.378 | 0.769 | 2.50E-05 | 0.000321024 |
| ENSG00000100439 | ABHD4    | 4.222 | -0.311 | 0.806 | 2.51E-05 | 0.000321955 |
| ENSG00000214706 | IFRD2    | 4.441 | 0.338  | 1.264 | 2.52E-05 | 0.000322071 |
| ENSG00000156398 | SFXN2    | 2.714 | -0.486 | 0.714 | 2.52E-05 | 0.000322551 |
| ENSG00000138095 | LRPPRC   | 5.865 | -0.281 | 0.823 | 2.60E-05 | 0.000331688 |
| ENSG00000182220 | ATP6AP2  | 6.995 | 0.331  | 1.258 | 2.61E-05 | 0.000333095 |
| ENSG00000185634 | SHC4     | 4.822 | 0.879  | 1.840 | 2.64E-05 | 0.000335845 |
| ENSG00000123130 | ACOT9    | 4.833 | 0.268  | 1.204 | 2.64E-05 | 0.000335845 |
| ENSG00000114423 | CBLB     | 4.779 | 0.403  | 1.322 | 2.67E-05 | 0.000339109 |
| ENSG00000104763 | ASAH1    | 6.361 | -0.257 | 0.837 | 2.68E-05 | 0.000340102 |
| ENSG00000136048 | DRAM1    | 3.385 | -0.349 | 0.785 | 2.69E-05 | 0.00034111  |
| ENSG00000136830 | FAM129B  | 8.338 | 0.312  | 1.241 | 2.69E-05 | 0.00034111  |
| ENSG00000054983 | GALC     | 4.035 | -0.302 | 0.811 | 2.72E-05 | 0.000343689 |
| ENSG00000109158 | GABRA4   | 4.750 | -0.580 | 0.669 | 2.74E-05 | 0.0003463   |



|                 |           |       |        |       |          |             |
|-----------------|-----------|-------|--------|-------|----------|-------------|
| ENSG00000251022 | THAP9-AS1 | 5.017 | -0.270 | 0.829 | 2.75E-05 | 0.000347163 |
| ENSG00000100105 | PATZ1     | 4.409 | -0.301 | 0.812 | 2.76E-05 | 0.000347181 |
| ENSG00000198908 | BHLHB9    | 2.702 | -0.476 | 0.719 | 2.78E-05 | 0.000349661 |
| ENSG00000213694 | S1PR3     | 3.690 | 0.864  | 1.820 | 2.78E-05 | 0.000349685 |
| ENSG00000158604 | TMED4     | 6.631 | -0.255 | 0.838 | 2.80E-05 | 0.000351394 |
| ENSG00000183718 | TRIM52    | 3.171 | -0.418 | 0.748 | 2.81E-05 | 0.000351843 |
| ENSG00000137331 | IER3      | 6.231 | 0.782  | 1.720 | 2.83E-05 | 0.000354764 |
| ENSG00000147274 | RBMX      | 6.946 | -0.266 | 0.831 | 2.84E-05 | 0.000355178 |
| ENSG00000236287 | ZBED5     | 5.784 | -0.285 | 0.820 | 2.85E-05 | 0.000355178 |
| ENSG00000180891 | CUEDC1    | 4.394 | 0.554  | 1.468 | 2.85E-05 | 0.000355178 |
| ENSG00000163539 | CLASP2    | 5.323 | -0.517 | 0.699 | 2.87E-05 | 0.000357868 |
| ENSG00000260549 | MT1L      | 3.934 | 0.773  | 1.708 | 2.90E-05 | 0.000361045 |
| ENSG00000109654 | TRIM2     | 4.300 | -0.484 | 0.715 | 2.91E-05 | 0.000361045 |
| ENSG00000145431 | PDGFC     | 5.822 | 0.571  | 1.486 | 2.91E-05 | 0.000361045 |
| ENSG00000112294 | ALDH5A1   | 2.665 | -0.574 | 0.672 | 2.91E-05 | 0.000361045 |
| ENSG00000160307 | S100B     | 7.714 | -0.463 | 0.725 | 2.94E-05 | 0.000364031 |
| ENSG00000197467 | COL13A1   | 3.781 | 0.702  | 1.627 | 2.94E-05 | 0.000364339 |
| ENSG00000154642 | C21orf91  | 2.636 | -0.484 | 0.715 | 2.95E-05 | 0.000364792 |
| ENSG00000149218 | ENDOD1    | 5.488 | 0.333  | 1.260 | 2.96E-05 | 0.000364792 |
| ENSG00000198648 | STK39     | 4.640 | -0.431 | 0.742 | 2.96E-05 | 0.000365304 |
| ENSG00000133789 | SWAP70    | 5.966 | -0.400 | 0.758 | 2.98E-05 | 0.000366805 |
| ENSG00000117280 | RAB29     | 4.674 | 0.412  | 1.330 | 2.98E-05 | 0.000366805 |
| ENSG00000134243 | SORT1     | 6.160 | 0.542  | 1.456 | 2.99E-05 | 0.000367929 |
| ENSG00000105854 | PON2      | 4.516 | 0.393  | 1.313 | 3.03E-05 | 0.000371442 |
| ENSG00000170837 | GPR27     | 2.798 | -0.593 | 0.663 | 3.03E-05 | 0.000371442 |
| ENSG00000123095 | BHLHE41   | 7.048 | -0.431 | 0.742 | 3.03E-05 | 0.000371442 |
| ENSG00000095637 | SORBS1    | 4.813 | -0.719 | 0.607 | 3.04E-05 | 0.000371442 |
| ENSG00000171631 | P2RY6     | 4.062 | 0.631  | 1.549 | 3.04E-05 | 0.000371442 |
| ENSG00000189241 | TSPYL1    | 5.876 | -0.278 | 0.825 | 3.04E-05 | 0.000371442 |
| ENSG00000135336 | ORC3      | 4.331 | -0.276 | 0.826 | 3.06E-05 | 0.000372971 |
| ENSG00000157259 | GATAD1    | 5.812 | -0.414 | 0.750 | 3.07E-05 | 0.000373287 |
| ENSG00000121898 | CPXM2     | 6.299 | -0.481 | 0.716 | 3.07E-05 | 0.000373287 |
| ENSG00000100577 | GSTZ1     | 3.881 | 0.507  | 1.421 | 3.08E-05 | 0.000373755 |
| ENSG00000148248 | SURF4     | 7.989 | 0.254  | 1.192 | 3.09E-05 | 0.000374894 |
| ENSG00000196586 | MYO6      | 4.925 | 0.413  | 1.331 | 3.23E-05 | 0.000391874 |
| ENSG00000198060 | MARCH5    | 4.915 | -0.268 | 0.831 | 3.27E-05 | 0.000395202 |
| ENSG00000004660 | CAMKK1    | 5.888 | 0.496  | 1.410 | 3.27E-05 | 0.000395202 |
| ENSG00000132436 | FIGNL1    | 2.862 | -0.490 | 0.712 | 3.30E-05 | 0.000398453 |
| ENSG00000165633 | VSTM4     | 6.219 | 0.452  | 1.368 | 3.30E-05 | 0.000398453 |
| ENSG00000162302 | RPS6KA4   | 3.941 | 0.433  | 1.350 | 3.32E-05 | 0.000399415 |
| ENSG00000156735 | BAG4      | 3.884 | -0.271 | 0.829 | 3.33E-05 | 0.000401251 |
| ENSG00000129250 | KIF1C     | 5.787 | 0.361  | 1.284 | 3.35E-05 | 0.000402476 |
| ENSG00000120693 | SMAD9     | 4.474 | -0.548 | 0.684 | 3.36E-05 | 0.000403089 |
| ENSG00000104660 | LEPROTL1  | 4.100 | 0.332  | 1.259 | 3.36E-05 | 0.000403279 |
| ENSG00000146386 | ABRACL    | 3.447 | 0.665  | 1.585 | 3.38E-05 | 0.000404939 |
| ENSG00000245532 | NEAT1     | 9.721 | -0.489 | 0.713 | 3.42E-05 | 0.000409434 |
| ENSG00000158966 | CACHD1    | 5.310 | 0.769  | 1.705 | 3.43E-05 | 0.000409833 |
| ENSG00000184164 | CRELD2    | 5.427 | 0.401  | 1.320 | 3.45E-05 | 0.000412157 |
| ENSG00000134285 | FKBP11    | 4.253 | 0.318  | 1.247 | 3.47E-05 | 0.000413826 |
| ENSG00000137496 | IL18BP    | 3.038 | -0.658 | 0.634 | 3.48E-05 | 0.000414476 |
| ENSG00000171792 | RHNO1     | 3.430 | -0.260 | 0.835 | 3.53E-05 | 0.000419877 |
| ENSG00000103005 | USB1      | 4.002 | 0.273  | 1.208 | 3.54E-05 | 0.000420528 |

|                 |          |       |        |       |          |             |
|-----------------|----------|-------|--------|-------|----------|-------------|
| ENSG00000173457 | PPP1R14B | 4.377 | 0.697  | 1.621 | 3.56E-05 | 0.000422721 |
| ENSG00000175395 | ZNF25    | 4.888 | -0.270 | 0.830 | 3.62E-05 | 0.000429    |
| ENSG00000136261 | BZW2     | 3.782 | 0.423  | 1.340 | 3.68E-05 | 0.000435242 |
| ENSG00000078814 | MYH7B    | 3.531 | -0.564 | 0.676 | 3.71E-05 | 0.000439284 |
| ENSG00000167232 | ZNF91    | 3.386 | -0.503 | 0.706 | 3.77E-05 | 0.000444713 |
| ENSG00000141753 | IGFBP4   | 8.252 | 1.332  | 2.517 | 3.77E-05 | 0.000444713 |
| ENSG00000133114 | GPALPP1  | 4.045 | -0.281 | 0.823 | 3.77E-05 | 0.000444722 |
| ENSG00000182809 | CRIP2    | 7.729 | 0.534  | 1.448 | 3.78E-05 | 0.000445601 |
| ENSG00000152990 | ADGRA3   | 5.887 | -0.339 | 0.791 | 3.81E-05 | 0.000447523 |
| ENSG00000079102 | RUNX1T1  | 3.393 | -0.561 | 0.678 | 3.81E-05 | 0.000447523 |
| ENSG00000164342 | TLR3     | 2.979 | -0.582 | 0.668 | 3.81E-05 | 0.000447523 |
| ENSG00000228510 |          | 3.641 | -0.510 | 0.702 | 3.86E-05 | 0.00045202  |
| ENSG00000164022 | AIMP1    | 5.384 | -0.245 | 0.844 | 3.86E-05 | 0.00045202  |
| ENSG00000141510 | TP53     | 4.283 | -0.330 | 0.795 | 3.88E-05 | 0.000453082 |
| ENSG00000081760 | AACS     | 5.412 | 0.257  | 1.195 | 3.88E-05 | 0.000453082 |
| ENSG00000123892 | RAB38    | 3.446 | 0.746  | 1.678 | 3.93E-05 | 0.000458152 |
| ENSG00000140044 | JDP2     | 5.774 | 0.308  | 1.238 | 3.93E-05 | 0.000458152 |
| ENSG00000114698 | PLSCR4   | 5.250 | -0.600 | 0.660 | 3.93E-05 | 0.000458152 |
| ENSG00000067445 | TRO      | 5.363 | -0.359 | 0.780 | 3.95E-05 | 0.000459389 |
| ENSG00000166704 | ZNF606   | 2.816 | -0.374 | 0.772 | 3.95E-05 | 0.000459389 |
| ENSG00000186350 | RXRA     | 6.541 | -0.336 | 0.792 | 4.00E-05 | 0.000464393 |
| ENSG00000111666 | CHPT1    | 4.894 | -0.286 | 0.820 | 4.03E-05 | 0.000467426 |
| ENSG00000100258 | LMF2     | 6.422 | 0.343  | 1.269 | 4.06E-05 | 0.000469654 |
| ENSG00000171016 | PYGO1    | 3.631 | -0.447 | 0.733 | 4.07E-05 | 0.000470657 |
| ENSG00000173041 | ZNF680   | 3.667 | -0.475 | 0.719 | 4.08E-05 | 0.000470795 |
| ENSG00000141219 | C17orf80 | 3.482 | -0.415 | 0.750 | 4.08E-05 | 0.000470795 |
| ENSG00000100997 | ABHD12   | 5.468 | 0.407  | 1.326 | 4.10E-05 | 0.000472671 |
| ENSG00000196666 | FAM180B  | 3.396 | -0.986 | 0.505 | 4.10E-05 | 0.000472671 |
| ENSG00000132000 | PODNL1   | 6.969 | 0.357  | 1.281 | 4.13E-05 | 0.000474815 |
| ENSG00000135269 | TES      | 5.267 | 0.511  | 1.425 | 4.15E-05 | 0.000476556 |
| ENSG00000100239 | PPP6R2   | 5.289 | 0.293  | 1.225 | 4.22E-05 | 0.000484908 |
| ENSG00000135622 | SEMA4F   | 3.314 | 0.370  | 1.292 | 4.28E-05 | 0.000490206 |
| ENSG00000101096 | NFATC2   | 6.853 | 0.799  | 1.740 | 4.29E-05 | 0.000490998 |
| ENSG00000177169 | ULK1     | 5.196 | 0.282  | 1.216 | 4.29E-05 | 0.000490998 |
| ENSG00000108312 | UBTF     | 6.211 | 0.291  | 1.223 | 4.31E-05 | 0.000492436 |
| ENSG00000114354 | TFG      | 6.677 | 0.220  | 1.165 | 4.32E-05 | 0.000493165 |
| ENSG00000099250 | NRP1     | 5.536 | -0.493 | 0.711 | 4.35E-05 | 0.000495891 |
| ENSG00000101577 | LPIN2    | 5.184 | -0.309 | 0.807 | 4.35E-05 | 0.000495891 |
| ENSG00000100307 | CBX7     | 6.640 | -0.296 | 0.815 | 4.39E-05 | 0.000499619 |
| ENSG00000147894 | C9orf72  | 3.332 | -0.398 | 0.759 | 4.41E-05 | 0.000501434 |
| ENSG00000164172 | MOCS2    | 4.535 | -0.240 | 0.847 | 4.43E-05 | 0.000502756 |
| ENSG00000173611 | SCAI     | 2.932 | -0.414 | 0.750 | 4.47E-05 | 0.000506479 |
| ENSG00000076258 | FMO4     | 2.793 | -0.380 | 0.768 | 4.49E-05 | 0.000509166 |
| ENSG00000172901 | LVRN     | 5.829 | -0.697 | 0.617 | 4.50E-05 | 0.000509301 |
| ENSG00000168301 | KCTD6    | 2.606 | -0.365 | 0.776 | 4.55E-05 | 0.000514219 |
| ENSG00000007944 | MYLIP    | 4.439 | -0.383 | 0.767 | 4.62E-05 | 0.000521977 |
| ENSG00000150995 | ITPR1    | 4.289 | 0.691  | 1.615 | 4.63E-05 | 0.000521977 |
| ENSG00000104774 | MAN2B1   | 5.284 | 0.445  | 1.361 | 4.63E-05 | 0.000522251 |
| ENSG00000051128 | HOMER3   | 3.050 | 0.499  | 1.413 | 4.68E-05 | 0.000526481 |
| ENSG00000150625 | GPM6A    | 2.569 | -1.101 | 0.466 | 4.73E-05 | 0.000531184 |
| ENSG00000012171 | SEMA3B   | 5.858 | 0.354  | 1.278 | 4.73E-05 | 0.000531184 |
| ENSG00000112983 | BRD8     | 5.609 | -0.340 | 0.790 | 4.73E-05 | 0.000531241 |

|                 |           |        |        |       |          |             |
|-----------------|-----------|--------|--------|-------|----------|-------------|
| ENSG00000132376 | INPP5K    | 4.995  | 0.264  | 1.201 | 4.79E-05 | 0.000537132 |
| ENSG00000128000 | ZNF780B   | 3.541  | -0.541 | 0.687 | 4.83E-05 | 0.000540931 |
| ENSG00000065717 | TLE2      | 3.930  | -0.737 | 0.600 | 4.88E-05 | 0.000546223 |
| ENSG00000154864 | PIEZO2    | 5.540  | -1.152 | 0.450 | 4.89E-05 | 0.000546529 |
| ENSG00000196739 | COL27A1   | 8.824  | -0.491 | 0.712 | 4.92E-05 | 0.000549396 |
| ENSG00000154127 | UBASH3B   | 5.055  | 0.625  | 1.542 | 4.99E-05 | 0.000556666 |
| ENSG00000142634 | EFHD2     | 4.301  | 0.846  | 1.798 | 5.01E-05 | 0.000557752 |
| ENSG00000130985 | UBA1      | 7.644  | 0.224  | 1.168 | 5.02E-05 | 0.000558417 |
| ENSG00000164077 | MON1A     | 2.741  | 0.491  | 1.405 | 5.03E-05 | 0.000559244 |
| ENSG00000160588 | MPZL3     | 3.053  | 0.554  | 1.468 | 5.29E-05 | 0.000586931 |
| ENSG00000177432 | NAP1L5    | 3.096  | -0.379 | 0.769 | 5.30E-05 | 0.000587697 |
| ENSG00000133393 | FOPNL     | 4.583  | -0.246 | 0.843 | 5.33E-05 | 0.000589861 |
| ENSG00000077684 | JADE1     | 5.133  | -0.305 | 0.809 | 5.33E-05 | 0.000589861 |
| ENSG00000120885 | CLU       | 15.313 | 0.471  | 1.386 | 5.35E-05 | 0.000591152 |
| ENSG00000164626 | KCNK5     | 5.788  | -0.642 | 0.641 | 5.37E-05 | 0.00059281  |
| ENSG00000101017 | CD40      | 3.506  | -0.678 | 0.625 | 5.39E-05 | 0.000594387 |
| ENSG00000034693 | PEX3      | 3.269  | -0.389 | 0.764 | 5.40E-05 | 0.000594646 |
| ENSG00000174938 | SEZ6L2    | 2.890  | 1.131  | 2.191 | 5.46E-05 | 0.000600817 |
| ENSG00000180447 | GAS1      | 8.184  | 0.557  | 1.471 | 5.53E-05 | 0.00060723  |
| ENSG00000180155 | LYNX1     | 6.466  | 0.244  | 1.184 | 5.53E-05 | 0.00060723  |
| ENSG00000032444 | PNPLA6    | 5.244  | 0.326  | 1.254 | 5.53E-05 | 0.00060723  |
| ENSG00000198039 | ZNF273    | 3.623  | -0.429 | 0.743 | 5.63E-05 | 0.000617634 |
| ENSG00000138162 | TACC2     | 5.662  | 0.356  | 1.280 | 5.69E-05 | 0.000622281 |
| ENSG00000170876 | TMEM43    | 7.414  | 0.283  | 1.217 | 5.69E-05 | 0.000622281 |
| ENSG00000073050 | XRCC1     | 4.612  | 0.333  | 1.259 | 5.71E-05 | 0.000623413 |
| ENSG00000179104 | TMTC2     | 3.409  | -0.797 | 0.575 | 5.81E-05 | 0.000634321 |
| ENSG00000136861 | CDK5RAP2  | 5.409  | -0.272 | 0.828 | 5.82E-05 | 0.000634321 |
| ENSG00000204623 | ZNRD1ASP  | 3.304  | -0.696 | 0.617 | 5.84E-05 | 0.000636249 |
| ENSG00000123146 | ADGRE5    | 5.187  | 0.549  | 1.463 | 5.86E-05 | 0.000638047 |
| ENSG00000105974 | CAV1      | 7.548  | 0.331  | 1.258 | 5.93E-05 | 0.000644887 |
| ENSG00000073711 | PPP2R3A   | 3.836  | 0.478  | 1.393 | 5.95E-05 | 0.000645996 |
| ENSG00000159596 | TMEM69    | 3.650  | -0.312 | 0.806 | 5.96E-05 | 0.000646348 |
| ENSG00000106538 | RARRES2   | 4.526  | -1.403 | 0.378 | 5.98E-05 | 0.000647729 |
| ENSG00000111077 | TNS2      | 7.448  | -0.366 | 0.776 | 6.04E-05 | 0.000654344 |
| ENSG00000185033 | SEMA4B    | 4.937  | 0.352  | 1.276 | 6.06E-05 | 0.000655379 |
| ENSG00000181938 | GINS3     | 3.704  | 0.459  | 1.375 | 6.11E-05 | 0.000659653 |
| ENSG00000226752 | PSMD5-AS1 | 3.945  | -0.380 | 0.769 | 6.13E-05 | 0.000661144 |
| ENSG00000087903 | RFX2      | 3.482  | 0.609  | 1.525 | 6.15E-05 | 0.000662487 |
| ENSG00000146476 | ARMT1     | 3.824  | -0.333 | 0.794 | 6.17E-05 | 0.000663866 |
| ENSG00000164776 | PHKG1     | 3.091  | -0.665 | 0.631 | 6.17E-05 | 0.000663866 |
| ENSG00000164574 | GALNT10   | 7.170  | -0.353 | 0.783 | 6.20E-05 | 0.000665849 |
| ENSG00000137504 | CREBZF    | 5.696  | -0.458 | 0.728 | 6.25E-05 | 0.000671389 |
| ENSG00000049130 | KITLG     | 5.210  | -0.780 | 0.582 | 6.26E-05 | 0.000671389 |
| ENSG00000163110 | PDLIM5    | 7.200  | -0.415 | 0.750 | 6.29E-05 | 0.000673489 |
| ENSG00000197879 | MYO1C     | 7.040  | 0.253  | 1.192 | 6.30E-05 | 0.000673489 |
| ENSG00000125503 | PPP1R12C  | 5.662  | 0.372  | 1.294 | 6.30E-05 | 0.000673489 |
| ENSG00000154258 | ABCA9     | 2.609  | -0.951 | 0.517 | 6.32E-05 | 0.000675145 |
| ENSG00000168016 | TRANK1    | 4.355  | -0.591 | 0.664 | 6.33E-05 | 0.000675145 |
| ENSG00000172795 | DCP2      | 4.724  | -0.302 | 0.811 | 6.34E-05 | 0.000675145 |
| ENSG00000068878 | PSME4     | 6.253  | -0.408 | 0.754 | 6.34E-05 | 0.000675145 |
| ENSG00000154265 | ABCA5     | 6.883  | -0.566 | 0.675 | 6.48E-05 | 0.000688927 |
| ENSG00000183621 | ZNF438    | 3.742  | 0.282  | 1.216 | 6.56E-05 | 0.000697024 |

|                 |          |       |        |       |          |             |
|-----------------|----------|-------|--------|-------|----------|-------------|
| ENSG00000113583 | C5orf15  | 7.273 | -0.279 | 0.824 | 6.59E-05 | 0.000699665 |
| ENSG00000140386 | SCAPER   | 3.798 | -0.364 | 0.777 | 6.61E-05 | 0.000700979 |
| ENSG00000111424 | VDR      | 3.676 | -0.483 | 0.715 | 6.69E-05 | 0.000708492 |
| ENSG00000104549 | SQLE     | 4.962 | 0.424  | 1.342 | 6.69E-05 | 0.000708492 |
| ENSG00000144366 | GULP1    | 5.442 | -0.434 | 0.740 | 6.70E-05 | 0.000708623 |
| ENSG00000161249 | DMKN     | 4.886 | -0.436 | 0.739 | 6.72E-05 | 0.000709954 |
| ENSG00000006042 | TMEM98   | 6.236 | -0.244 | 0.844 | 6.73E-05 | 0.000709972 |
| ENSG00000142327 | RNPEPL1  | 4.671 | 0.477  | 1.392 | 6.74E-05 | 0.000710041 |
| ENSG00000133641 | C12orf29 | 3.841 | -0.247 | 0.842 | 6.77E-05 | 0.000713152 |
| ENSG00000183513 | COA5     | 4.474 | -0.256 | 0.837 | 6.79E-05 | 0.000714535 |
| ENSG00000113240 | CLK4     | 4.881 | -0.378 | 0.769 | 6.95E-05 | 0.000730347 |
| ENSG00000162627 | SNX7     | 4.574 | 0.606  | 1.522 | 7.06E-05 | 0.000740338 |
| ENSG00000125965 | GDF5     | 4.506 | 0.564  | 1.479 | 7.06E-05 | 0.000740338 |
| ENSG00000184500 | PROS1    | 6.582 | -0.256 | 0.837 | 7.07E-05 | 0.000740833 |
| ENSG00000163510 | CWC22    | 4.704 | -0.287 | 0.820 | 7.10E-05 | 0.000743006 |
| ENSG00000110619 | CARS     | 5.189 | 0.328  | 1.255 | 7.10E-05 | 0.000743006 |
| ENSG00000019549 | SNAI2    | 6.943 | -0.436 | 0.739 | 7.12E-05 | 0.000744202 |
| ENSG00000106031 | HOXA13   | 3.780 | -0.520 | 0.697 | 7.15E-05 | 0.000746555 |
| ENSG00000138061 | CYP1B1   | 6.102 | -0.699 | 0.616 | 7.16E-05 | 0.000746951 |
| ENSG00000135678 | CPM      | 2.644 | -0.800 | 0.574 | 7.20E-05 | 0.000749649 |
| ENSG00000109586 | GALNT7   | 4.380 | 0.551  | 1.465 | 7.20E-05 | 0.000749649 |
| ENSG00000069849 | ATP1B3   | 5.833 | 0.341  | 1.266 | 7.23E-05 | 0.000751656 |
| ENSG00000108423 | TUBD1    | 3.491 | -0.341 | 0.790 | 7.28E-05 | 0.000755663 |
| ENSG00000158555 | GDPD5    | 4.160 | 0.599  | 1.514 | 7.38E-05 | 0.000765399 |
| ENSG00000123268 | ATF1     | 4.389 | -0.324 | 0.799 | 7.49E-05 | 0.000775455 |
| ENSG00000171812 | COL8A2   | 7.612 | 0.475  | 1.390 | 7.49E-05 | 0.000775455 |
| ENSG00000148154 | UGCG     | 4.845 | -0.364 | 0.777 | 7.61E-05 | 0.000787654 |
| ENSG00000100473 | COCH     | 2.923 | 1.603  | 3.038 | 7.63E-05 | 0.000787986 |
| ENSG00000124222 | STX16    | 6.024 | -0.273 | 0.828 | 7.72E-05 | 0.000796687 |
| ENSG00000184682 |          | 4.254 | -0.593 | 0.663 | 7.76E-05 | 0.000799376 |
| ENSG00000178202 | KDELC2   | 6.908 | -0.322 | 0.800 | 7.76E-05 | 0.000799376 |
| ENSG00000188483 | IER5L    | 3.301 | 0.587  | 1.502 | 7.78E-05 | 0.000800517 |
| ENSG00000111684 | LPCAT3   | 3.437 | -0.450 | 0.732 | 7.82E-05 | 0.000804269 |
| ENSG00000117519 | CNN3     | 7.394 | -0.299 | 0.813 | 7.91E-05 | 0.000812431 |
| ENSG00000248905 | FMN1     | 4.173 | -0.644 | 0.640 | 8.02E-05 | 0.000822747 |
| ENSG00000171552 | BCL2L1   | 4.889 | 0.396  | 1.316 | 8.03E-05 | 0.000822927 |
| ENSG00000118971 | CCND2    | 6.383 | 0.303  | 1.234 | 8.04E-05 | 0.000823824 |
| ENSG00000173153 | ESRRA    | 3.422 | 0.412  | 1.331 | 8.09E-05 | 0.000827687 |
| ENSG00000152582 | SPEF2    | 3.638 | -0.533 | 0.691 | 8.10E-05 | 0.000827687 |
| ENSG00000105404 | RABAC1   | 7.297 | 0.538  | 1.452 | 8.13E-05 | 0.000830645 |
| ENSG00000132912 | DCTN4    | 5.347 | -0.255 | 0.838 | 8.22E-05 | 0.000838683 |
| ENSG00000136986 | DERL1    | 5.954 | 0.242  | 1.182 | 8.26E-05 | 0.000841356 |
| ENSG00000168646 | AXIN2    | 4.016 | 0.590  | 1.506 | 8.26E-05 | 0.000841356 |
| ENSG00000206190 | ATP10A   | 5.780 | 0.351  | 1.275 | 8.30E-05 | 0.000844348 |
| ENSG00000107959 | PITRM1   | 6.264 | 0.245  | 1.185 | 8.32E-05 | 0.000845841 |
| ENSG00000170540 | ARL6IP1  | 5.034 | -0.311 | 0.806 | 8.39E-05 | 0.000852004 |
| ENSG00000108106 | UBE2S    | 2.871 | 0.697  | 1.621 | 8.43E-05 | 0.000855015 |
| ENSG00000052795 | FNIP2    | 6.225 | 0.786  | 1.724 | 8.45E-05 | 0.000856127 |
| ENSG00000114999 | TTL      | 4.573 | 0.370  | 1.292 | 8.49E-05 | 0.000859147 |
| ENSG00000115307 | AUP1     | 6.245 | 0.423  | 1.341 | 8.66E-05 | 0.000875845 |
| ENSG00000267100 | ILF3-AS1 | 5.026 | -0.540 | 0.688 | 8.73E-05 | 0.000882228 |
| ENSG00000136002 | ARHGEF4  | 3.271 | -0.524 | 0.695 | 8.78E-05 | 0.000886725 |

|                 |          |       |        |       |             |             |
|-----------------|----------|-------|--------|-------|-------------|-------------|
| ENSG00000088367 | EPB41L1  | 5.551 | -0.393 | 0.762 | 8.83E-05    | 0.000890455 |
| ENSG00000147576 | ADHFE1   | 3.100 | -0.575 | 0.672 | 8.86E-05    | 0.000892566 |
| ENSG00000090971 | NAT14    | 3.189 | 0.678  | 1.600 | 8.91E-05    | 0.000896626 |
| ENSG00000049239 | H6PD     | 6.789 | -0.293 | 0.816 | 9.02E-05    | 0.00090752  |
| ENSG00000114867 | EIF4G1   | 7.348 | 0.299  | 1.230 | 9.09E-05    | 0.000912765 |
| ENSG00000139651 | ZNF740   | 4.692 | -0.325 | 0.798 | 9.10E-05    | 0.000912765 |
| ENSG00000188321 | ZNF559   | 3.787 | -0.304 | 0.810 | 9.10E-05    | 0.000912765 |
| ENSG00000178026 | LRRC75B  | 3.177 | 0.457  | 1.373 | 9.13E-05    | 0.000914915 |
| ENSG00000176533 | GNG7     | 3.541 | 0.433  | 1.350 | 9.15E-05    | 0.000915989 |
| ENSG00000166262 | FAM227B  | 2.888 | -0.415 | 0.750 | 9.26E-05    | 0.000925776 |
| ENSG00000256043 | CTSO     | 5.728 | -0.279 | 0.824 | 9.30E-05    | 0.000928874 |
| ENSG00000151332 | MBIP     | 4.509 | -0.282 | 0.822 | 9.31E-05    | 0.000928874 |
| ENSG00000163453 | IGFBP7   | 7.388 | 0.842  | 1.792 | 9.33E-05    | 0.000929731 |
| ENSG00000095209 | TMEM38B  | 3.066 | -0.407 | 0.754 | 9.33E-05    | 0.000929731 |
| ENSG00000164751 | PEX2     | 4.811 | -0.220 | 0.858 | 9.36E-05    | 0.000931342 |
| ENSG00000136536 | MARCH7   | 5.662 | -0.273 | 0.828 | 9.39E-05    | 0.000932885 |
| ENSG00000229644 | NAMPTP1  | 3.953 | -0.811 | 0.570 | 9.39E-05    | 0.000932885 |
| ENSG00000157613 | CREB3L1  | 3.902 | 0.711  | 1.637 | 9.44E-05    | 0.000936678 |
| ENSG00000176485 | PLA2G16  | 4.147 | -0.677 | 0.626 | 9.49E-05    | 0.000940754 |
| ENSG00000070018 | LRP6     | 6.081 | -0.581 | 0.668 | 9.61E-05    | 0.000951837 |
| ENSG00000156140 | ADAMTS3  | 2.804 | -0.527 | 0.694 | 9.68E-05    | 0.000958024 |
| ENSG00000092964 | DPYSL2   | 6.744 | 0.350  | 1.274 | 9.76E-05    | 0.000964594 |
| ENSG00000096696 | DSP      | 5.727 | 0.745  | 1.676 | 9.78E-05    | 0.000965352 |
| ENSG00000138750 | NUP54    | 4.740 | -0.203 | 0.869 | 9.80E-05    | 0.000967275 |
| ENSG00000115808 | STRN     | 4.745 | -0.536 | 0.689 | 9.81E-05    | 0.000967275 |
| ENSG00000140391 | TSPAN3   | 7.563 | -0.252 | 0.840 | 9.84E-05    | 0.000969404 |
| ENSG00000164631 | ZNF12    | 4.327 | -0.323 | 0.800 | 9.89E-05    | 0.000972988 |
| ENSG00000197894 | ADH5     | 5.603 | -0.242 | 0.845 | 9.91E-05    | 0.000973911 |
| ENSG00000116514 | RNF19B   | 5.579 | 0.487  | 1.402 | 0.000100625 | 0.000988127 |
| ENSG00000128228 | SDF2L1   | 3.704 | 0.690  | 1.613 | 0.000101444 | 0.000995232 |
| ENSG00000116574 | RHOA     | 5.629 | -0.396 | 0.760 | 0.000102044 | 0.000999429 |
| ENSG00000140455 | USP3     | 3.375 | 0.294  | 1.226 | 0.000102062 | 0.000999429 |
| ENSG00000196247 | ZNF107   | 3.382 | -0.615 | 0.653 | 0.000102598 | 0.001003735 |
| ENSG00000112175 | BMP5     | 2.930 | -1.314 | 0.402 | 0.000103143 | 0.001008124 |
| ENSG00000187689 | AMTN     | 5.670 | 1.290  | 2.445 | 0.000103339 | 0.001009102 |
| ENSG00000122085 | MTERF4   | 4.500 | -0.252 | 0.840 | 0.000103962 | 0.001014234 |
| ENSG00000160360 | GPSM1    | 6.311 | -0.313 | 0.805 | 0.000104967 | 0.001023082 |
| ENSG00000176390 | CRLF3    | 2.972 | -0.305 | 0.810 | 0.000105376 | 0.001026117 |
| ENSG00000164976 | KIAA1161 | 3.601 | -0.519 | 0.698 | 0.000106079 | 0.001032    |
| ENSG00000188313 | PLSCR1   | 4.568 | -0.313 | 0.805 | 0.000106731 | 0.00103738  |
| ENSG00000116521 | SCAMP3   | 5.915 | 0.272  | 1.207 | 0.000107115 | 0.001040147 |
| ENSG00000100591 | AHSA1    | 5.861 | 0.250  | 1.190 | 0.000108016 | 0.001047929 |
| ENSG00000179820 | MYADM    | 7.254 | 0.415  | 1.333 | 0.000109357 | 0.001059952 |
| ENSG00000117226 | GBP3     | 3.127 | -0.424 | 0.745 | 0.000110299 | 0.001068098 |
| ENSG00000108551 | RASD1    | 5.903 | -0.739 | 0.599 | 0.000111142 | 0.00107526  |
| ENSG00000131584 | ACAP3    | 4.805 | 0.326  | 1.253 | 0.000112707 | 0.001088635 |
| ENSG00000103742 | IGDCC4   | 3.087 | -0.532 | 0.692 | 0.000112732 | 0.001088635 |
| ENSG00000181830 | SLC35C1  | 4.388 | 0.326  | 1.254 | 0.000112982 | 0.001090039 |
| ENSG00000108064 | TFAM     | 4.025 | -0.311 | 0.806 | 0.000114373 | 0.001102451 |
| ENSG00000147475 | ERLIN2   | 5.740 | -0.304 | 0.810 | 0.000115582 | 0.001113071 |
| ENSG00000187134 | AKR1C1   | 4.963 | 0.748  | 1.679 | 0.000116226 | 0.00111825  |
| ENSG00000272091 |          | 3.167 | -0.264 | 0.833 | 0.000116813 | 0.001122868 |

|                 |           |       |        |       |             |             |
|-----------------|-----------|-------|--------|-------|-------------|-------------|
| ENSG0000004799  | PDK4      | 4.432 | -0.588 | 0.665 | 0.00011697  | 0.001123027 |
| ENSG00000143624 | INTS3     | 6.368 | -0.357 | 0.781 | 0.000117045 | 0.001123027 |
| ENSG00000157601 | MX1       | 3.413 | -0.574 | 0.672 | 0.000118133 | 0.001132432 |
| ENSG00000145476 | CYP4V2    | 5.408 | -0.315 | 0.804 | 0.000118661 | 0.001136449 |
| ENSG00000104231 | ZFAND1    | 5.076 | -0.232 | 0.851 | 0.000119278 | 0.001141318 |
| ENSG00000119669 | IRF2BPL   | 4.763 | 0.314  | 1.243 | 0.000120359 | 0.001150607 |
| ENSG00000105397 | TYK2      | 5.536 | 0.209  | 1.156 | 0.000120915 | 0.001154875 |
| ENSG00000162836 | ACP6      | 3.283 | -0.394 | 0.761 | 0.000122079 | 0.001164922 |
| ENSG00000171992 | SYNPO     | 8.524 | 0.316  | 1.245 | 0.000122821 | 0.001170942 |
| ENSG00000101230 | ISM1      | 8.152 | -0.497 | 0.709 | 0.000123629 | 0.001177574 |
| ENSG00000146247 | PHIP      | 5.261 | -0.498 | 0.708 | 0.000124747 | 0.001187139 |
| ENSG00000126903 | SLC10A3   | 5.443 | 0.243  | 1.184 | 0.000124901 | 0.001187521 |
| ENSG00000180263 | FGD6      | 2.750 | -0.918 | 0.529 | 0.000125322 | 0.001188726 |
| ENSG00000159200 | RCAN1     | 8.033 | 0.802  | 1.744 | 0.000125345 | 0.001188726 |
| ENSG00000114993 | RTKN      | 6.242 | 0.217  | 1.162 | 0.000125368 | 0.001188726 |
| ENSG00000123096 | SSPN      | 4.569 | -0.677 | 0.625 | 0.000125622 | 0.001190059 |
| ENSG00000161526 | SAP30BP   | 5.504 | 0.293  | 1.225 | 0.000125745 | 0.001190145 |
| ENSG0000015479  | MATR3     | 7.749 | -0.256 | 0.838 | 0.000126169 | 0.001192722 |
| ENSG00000067955 | CBFB      | 5.253 | -0.226 | 0.855 | 0.000126245 | 0.001192722 |
| ENSG00000166173 | LARP6     | 4.857 | 0.284  | 1.218 | 0.000126506 | 0.001194111 |
| ENSG00000163071 | SPATA18   | 4.085 | -0.438 | 0.738 | 0.000127343 | 0.001200923 |
| ENSG00000105793 | GTPBP10   | 3.480 | -0.293 | 0.816 | 0.00012813  | 0.001207256 |
| ENSG00000013364 | MVP       | 7.320 | 0.435  | 1.352 | 0.000128458 | 0.001209264 |
| ENSG00000235863 | B3GALT4   | 3.251 | 0.481  | 1.395 | 0.000129088 | 0.001213997 |
| ENSG00000135632 | SMYD5     | 4.639 | -0.261 | 0.835 | 0.000129193 | 0.001213997 |
| ENSG00000117625 | RCOR3     | 5.664 | -0.334 | 0.793 | 0.000130858 | 0.001228538 |
| ENSG00000136205 | TNS3      | 8.416 | -0.492 | 0.711 | 0.000132091 | 0.001239    |
| ENSG00000131196 | NFATC1    | 6.369 | 0.276  | 1.211 | 0.000133314 | 0.001249355 |
| ENSG00000143401 | ANP32E    | 5.568 | -0.248 | 0.842 | 0.000134085 | 0.001255461 |
| ENSG00000115947 | ORC4      | 4.105 | -0.267 | 0.831 | 0.00013477  | 0.00126074  |
| ENSG00000158006 | PAFAH2    | 4.355 | -0.378 | 0.769 | 0.000135224 | 0.001263861 |
| ENSG00000104368 | PLAT      | 3.086 | 0.651  | 1.570 | 0.000135521 | 0.001265506 |
| ENSG00000164294 | GPX8      | 6.328 | 0.300  | 1.231 | 0.000136159 | 0.00127033  |
| ENSG00000244509 | APOBEC3C  | 3.712 | 0.468  | 1.383 | 0.000137167 | 0.001277205 |
| ENSG00000122034 | GTF3A     | 5.318 | 0.456  | 1.371 | 0.000137204 | 0.001277205 |
| ENSG00000082074 | FYB       | 2.767 | -1.024 | 0.492 | 0.000137278 | 0.001277205 |
| ENSG00000165943 | MOAP1     | 3.925 | -0.249 | 0.841 | 0.000137384 | 0.001277205 |
| ENSG00000198960 | ARMCX6    | 3.210 | -0.387 | 0.765 | 0.000137604 | 0.00127812  |
| ENSG00000047849 | MAP4      | 7.827 | 0.260  | 1.197 | 0.000140777 | 0.001306433 |
| ENSG00000248508 | SRP14-AS1 | 2.778 | -0.363 | 0.777 | 0.000140936 | 0.001306746 |
| ENSG00000139178 | C1RL      | 5.823 | -0.234 | 0.850 | 0.000142052 | 0.001315823 |
| ENSG00000160767 | FAM189B   | 4.059 | 0.281  | 1.215 | 0.000142166 | 0.001315823 |
| ENSG00000215717 | TMEM167B  | 5.869 | -0.209 | 0.865 | 0.000143214 | 0.001324139 |
| ENSG00000185650 | ZFP36L1   | 7.416 | -0.332 | 0.795 | 0.000143318 | 0.001324139 |
| ENSG00000172531 | PPP1CA    | 5.399 | 0.370  | 1.292 | 0.00014376  | 0.001327053 |
| ENSG00000170421 | KRT8      | 5.221 | 0.391  | 1.312 | 0.000144817 | 0.001335631 |
| ENSG00000167543 | TP53I13   | 5.634 | 0.368  | 1.291 | 0.000144945 | 0.001335642 |
| ENSG00000164104 | HMGB2     | 5.423 | -0.378 | 0.769 | 0.000150263 | 0.001383425 |
| ENSG00000173226 | IQCB1     | 4.253 | -0.257 | 0.837 | 0.00015128  | 0.001391315 |
| ENSG00000197694 | SPTAN1    | 7.477 | 0.266  | 1.203 | 0.000151386 | 0.001391315 |
| ENSG00000145050 | MANF      | 5.678 | 0.462  | 1.378 | 0.000151881 | 0.001394642 |
| ENSG00000100941 | PNN       | 6.131 | -0.287 | 0.820 | 0.000152584 | 0.001399381 |

|                 |             |        |        |       |             |             |
|-----------------|-------------|--------|--------|-------|-------------|-------------|
| ENSG00000144591 | GMPPA       | 5.870  | 0.323  | 1.251 | 0.000152665 | 0.001399381 |
| ENSG00000196588 | MKL1        | 4.083  | 0.312  | 1.241 | 0.000153776 | 0.001408339 |
| ENSG00000100650 | SRSF5       | 8.608  | -0.341 | 0.790 | 0.000155591 | 0.001426635 |
| ENSG00000173376 | NDNF        | 6.729  | -0.758 | 0.591 | 0.000156166 | 0.001427725 |
| ENSG00000137414 | FAM8A1      | 5.575  | -0.334 | 0.793 | 0.00015633  | 0.00142798  |
| ENSG00000243317 | C7orf73     | 6.337  | 0.305  | 1.236 | 0.000158264 | 0.001444384 |
| ENSG00000188906 | LRRK2       | 2.764  | -0.618 | 0.652 | 0.000158434 | 0.001444674 |
| ENSG00000169116 | PARM1       | 6.221  | -0.643 | 0.641 | 0.000159186 | 0.00145027  |
| ENSG00000174428 | GTF2IRD2B   | 3.803  | -0.363 | 0.777 | 0.000159367 | 0.001450654 |
| ENSG00000115318 | LOXL3       | 7.105  | 0.679  | 1.601 | 0.000159757 | 0.001452938 |
| ENSG00000100225 | FBXO7       | 6.106  | 0.191  | 1.142 | 0.000160018 | 0.001454055 |
| ENSG00000089639 | GMIP        | 2.853  | 0.448  | 1.364 | 0.000160667 | 0.001458685 |
| ENSG00000198730 | CTR9        | 5.181  | -0.227 | 0.854 | 0.000161064 | 0.001461022 |
| ENSG00000064933 | PMS1        | 3.935  | -0.265 | 0.832 | 0.000161422 | 0.001463004 |
| ENSG00000185507 | IRF7        | 3.726  | 0.515  | 1.429 | 0.000161649 | 0.001463621 |
| ENSG00000167244 | IGF2        | 6.821  | -0.745 | 0.597 | 0.00016177  | 0.001463621 |
| ENSG00000135750 | KCNK1       | 4.418  | 0.321  | 1.250 | 0.000161964 | 0.001464111 |
| ENSG00000103326 | CAPN15      | 3.752  | 0.324  | 1.251 | 0.000163119 | 0.001473277 |
| ENSG00000246922 | UBAP1L      | 3.340  | -0.438 | 0.738 | 0.000163519 | 0.001474428 |
| ENSG00000083896 | YTHDC1      | 5.921  | -0.281 | 0.823 | 0.000163528 | 0.001474428 |
| ENSG00000000457 | SCYL3       | 3.568  | -0.289 | 0.819 | 0.000166103 | 0.001496354 |
| ENSG00000068383 | INPP5A      | 3.226  | -0.462 | 0.726 | 0.000168103 | 0.001513071 |
| ENSG00000117643 | MAN1C1      | 2.867  | -0.622 | 0.650 | 0.000169007 | 0.001519902 |
| ENSG00000106809 | OGN         | 11.200 | 0.712  | 1.638 | 0.000169938 | 0.00152696  |
| ENSG00000196275 | GTF2IRD2    | 3.485  | -0.345 | 0.787 | 0.000171011 | 0.001535284 |
| ENSG00000198858 | R3HDM4      | 4.804  | 0.335  | 1.262 | 0.000171199 | 0.001535657 |
| ENSG00000104626 | ERI1        | 3.572  | -0.310 | 0.807 | 0.000172336 | 0.001544534 |
| ENSG00000175287 | PHYHD1      | 3.991  | -0.459 | 0.728 | 0.000173096 | 0.001550014 |
| ENSG00000154144 | TBRG1       | 4.432  | 0.245  | 1.185 | 0.0001736   | 0.001553202 |
| ENSG00000166825 | ANPEP       | 6.000  | 1.118  | 2.170 | 0.000175439 | 0.001568315 |
| ENSG00000169241 | SLC50A1     | 4.116  | 0.401  | 1.321 | 0.000176401 | 0.001575568 |
| ENSG00000182606 | TRAK1       | 3.748  | 0.553  | 1.467 | 0.000177355 | 0.001582735 |
| ENSG00000103042 | SLC38A7     | 3.088  | 0.327  | 1.254 | 0.000178862 | 0.00159483  |
| ENSG00000137767 | SQRDL       | 3.100  | 1.129  | 2.187 | 0.000179035 | 0.001595008 |
| ENSG00000176171 | BNIP3       | 6.396  | -0.471 | 0.722 | 0.00017975  | 0.001600023 |
| ENSG00000165527 | ARF6        | 5.231  | 0.300  | 1.231 | 0.000180518 | 0.001605069 |
| ENSG00000241684 | ADAMTS9-AS2 | 2.805  | -0.533 | 0.691 | 0.000180624 | 0.001605069 |
| ENSG00000160753 | RUSC1       | 4.790  | 0.267  | 1.203 | 0.000181094 | 0.001607879 |
| ENSG00000163923 | RPL39L      | 3.014  | 0.552  | 1.467 | 0.000181887 | 0.001613551 |
| ENSG00000213923 | CSNK1E      | 5.764  | 0.220  | 1.165 | 0.000182135 | 0.001614387 |
| ENSG00000134463 | ECHDC3      | 2.882  | -0.386 | 0.765 | 0.000182915 | 0.001619924 |
| ENSG00000132849 | PATJ        | 4.372  | -0.419 | 0.748 | 0.000184522 | 0.001632779 |
| ENSG00000070669 | ASNS        | 4.159  | 0.339  | 1.265 | 0.000184763 | 0.001633531 |
| ENSG00000170271 | FAXDC2      | 5.863  | -0.443 | 0.735 | 0.000185341 | 0.001637259 |
| ENSG00000110880 | CORO1C      | 6.072  | 0.439  | 1.355 | 0.000186562 | 0.001646656 |
| ENSG00000196670 | ZFP62       | 3.730  | -0.315 | 0.804 | 0.000188732 | 0.001664408 |
| ENSG00000184640 | SEPT9       | 6.585  | 0.293  | 1.225 | 0.000189261 | 0.001667664 |
| ENSG00000189320 | FAM180A     | 4.222  | 0.814  | 1.758 | 0.000189498 | 0.001668348 |
| ENSG00000131724 | IL13RA1     | 7.417  | -0.261 | 0.834 | 0.0001907   | 0.001677517 |
| ENSG00000154263 | ABCA10      | 2.763  | -0.652 | 0.636 | 0.000192506 | 0.0016913   |
| ENSG00000179967 | PPP1R14BP3  | 3.493  | 0.656  | 1.575 | 0.00019259  | 0.0016913   |
| ENSG00000154096 | THY1        | 6.729  | 1.141  | 2.206 | 0.000193132 | 0.001694644 |

|                 |           |       |        |       |             |             |
|-----------------|-----------|-------|--------|-------|-------------|-------------|
| ENSG00000089775 | ZBTB25    | 4.130 | -0.405 | 0.755 | 0.000193488 | 0.001695344 |
| ENSG00000119986 | AVPI1     | 4.015 | 0.386  | 1.307 | 0.000193536 | 0.001695344 |
| ENSG00000187824 | TMEM220   | 3.779 | -0.345 | 0.788 | 0.000195382 | 0.00171008  |
| ENSG00000176915 | ANKLE2    | 5.738 | 0.247  | 1.186 | 0.000195615 | 0.001710689 |
| ENSG00000138764 | CCNG2     | 5.204 | -0.368 | 0.775 | 0.000196657 | 0.001718372 |
| ENSG00000139044 | B4GALNT3  | 6.952 | 0.255  | 1.193 | 0.000196926 | 0.001719287 |
| ENSG00000184205 | TSPYL2    | 6.937 | -0.423 | 0.746 | 0.00019767  | 0.001724344 |
| ENSG00000167779 | IGFBP6    | 7.245 | 0.829  | 1.776 | 0.000200308 | 0.001745896 |
| ENSG00000187257 | RSBN1L    | 4.341 | -0.287 | 0.820 | 0.000203513 | 0.001772362 |
| ENSG00000160789 | LMNA      | 9.037 | 0.489  | 1.404 | 0.000205192 | 0.001785497 |
| ENSG00000167103 | PIP5KL1   | 3.065 | 0.362  | 1.285 | 0.000205401 | 0.001785832 |
| ENSG00000159335 | PTMS      | 8.158 | 0.499  | 1.414 | 0.000205572 | 0.001785833 |
| ENSG00000163170 | BOLA3     | 2.866 | 0.462  | 1.377 | 0.000206674 | 0.001793391 |
| ENSG00000006611 | USH1C     | 3.080 | 0.893  | 1.858 | 0.000206785 | 0.001793391 |
| ENSG00000115170 | ACVR1     | 6.195 | 0.449  | 1.365 | 0.000207858 | 0.001800892 |
| ENSG00000156515 | HK1       | 7.128 | 0.240  | 1.181 | 0.000208135 | 0.001800892 |
| ENSG00000181004 | BBS12     | 3.263 | 0.320  | 1.248 | 0.000208166 | 0.001800892 |
| ENSG00000113648 | H2AFY     | 5.252 | 0.247  | 1.187 | 0.000208499 | 0.001802286 |
| ENSG00000138131 | LOXL4     | 4.864 | 0.849  | 1.801 | 0.000208922 | 0.001804449 |
| ENSG00000221890 | NPTXR     | 3.452 | -0.441 | 0.737 | 0.000209355 | 0.001806698 |
| ENSG00000168268 | NT5DC2    | 5.842 | 0.512  | 1.426 | 0.000209755 | 0.00180835  |
| ENSG00000164048 | ZNF589    | 3.558 | -0.341 | 0.789 | 0.000209892 | 0.00180835  |
| ENSG00000134201 | GSTM5     | 4.897 | -0.387 | 0.765 | 0.000212208 | 0.001826803 |
| ENSG00000175166 | PSMD2     | 6.419 | 0.192  | 1.142 | 0.000213139 | 0.001832702 |
| ENSG00000140105 | WARS      | 4.988 | 0.257  | 1.195 | 0.000213574 | 0.001832702 |
| ENSG00000187961 | KLHL17    | 3.761 | 0.265  | 1.201 | 0.000213588 | 0.001832702 |
| ENSG00000254837 |           | 2.768 | -0.320 | 0.801 | 0.00021375  | 0.001832702 |
| ENSG00000196136 | SERPINA3  | 4.268 | -1.179 | 0.442 | 0.000213769 | 0.001832702 |
| ENSG00000186020 | ZNF529    | 3.437 | -0.305 | 0.809 | 0.000216281 | 0.001852728 |
| ENSG00000167157 | PRRX2     | 4.578 | 0.654  | 1.573 | 0.000217608 | 0.001862567 |
| ENSG00000157796 | WDR19     | 4.920 | -0.380 | 0.769 | 0.000219135 | 0.001874106 |
| ENSG00000133816 | MICAL2    | 5.156 | 0.746  | 1.677 | 0.000219727 | 0.001877634 |
| ENSG00000117632 | STMN1     | 3.188 | 0.893  | 1.857 | 0.000220619 | 0.001883717 |
| ENSG00000164808 | SPIDR     | 5.206 | -0.249 | 0.842 | 0.000221819 | 0.001891345 |
| ENSG00000111581 | NUP107    | 4.213 | -0.278 | 0.825 | 0.000221874 | 0.001891345 |
| ENSG00000138594 | TMOD3     | 4.707 | 0.419  | 1.337 | 0.000224318 | 0.001910625 |
| ENSG00000179818 | PCBP1-AS1 | 4.403 | -0.256 | 0.838 | 0.0002255   | 0.001919134 |
| ENSG00000198756 | COLGALT2  | 8.411 | 0.482  | 1.397 | 0.000226975 | 0.001930114 |
| ENSG00000159069 | FBXW5     | 5.729 | 0.373  | 1.295 | 0.000228885 | 0.001944776 |
| ENSG00000165124 | SVEP1     | 4.387 | -0.904 | 0.534 | 0.000229962 | 0.00195235  |
| ENSG00000162599 | NFIA      | 5.457 | -0.451 | 0.732 | 0.000232592 | 0.001973075 |
| ENSG00000198542 | ITGBL1    | 4.821 | -0.590 | 0.665 | 0.000233764 | 0.001981411 |
| ENSG00000131462 | TUBG1     | 3.002 | 0.415  | 1.333 | 0.000233973 | 0.001981577 |
| ENSG00000144369 | FAM171B   | 2.767 | -0.459 | 0.727 | 0.00023432  | 0.001982912 |
| ENSG00000100994 | PYGB      | 5.986 | 0.263  | 1.200 | 0.000236634 | 0.002000876 |
| ENSG00000213366 | GSTM2     | 5.338 | -0.369 | 0.774 | 0.0002402   | 0.002026577 |
| ENSG00000198521 | ZNF43     | 2.940 | -0.317 | 0.803 | 0.000240235 | 0.002026577 |
| ENSG00000184497 | TMEM255B  | 3.443 | 0.498  | 1.412 | 0.000240254 | 0.002026577 |
| ENSG00000089486 | CDIP1     | 4.548 | -0.230 | 0.852 | 0.00024113  | 0.00203233  |
| ENSG00000166548 | TK2       | 5.027 | -0.281 | 0.823 | 0.000242419 | 0.002041544 |
| ENSG00000151623 | NR3C2     | 3.217 | -0.413 | 0.751 | 0.000244427 | 0.002056806 |
| ENSG00000175203 | DCTN2     | 6.122 | 0.308  | 1.238 | 0.000245115 | 0.002060938 |



|                 |            |       |        |       |             |             |
|-----------------|------------|-------|--------|-------|-------------|-------------|
| ENSG00000134152 | KATNBL1    | 3.955 | -0.201 | 0.870 | 0.000245937 | 0.002066184 |
| ENSG00000172466 | ZNF24      | 5.557 | -0.329 | 0.796 | 0.000246162 | 0.002066417 |
| ENSG00000263072 | ZNF213-AS1 | 3.021 | -0.428 | 0.743 | 0.000246531 | 0.002067854 |
| ENSG00000126562 | WNK4       | 2.633 | -0.608 | 0.656 | 0.00024708  | 0.002070262 |
| ENSG00000095739 | BAMBI      | 5.553 | -0.408 | 0.753 | 0.000247213 | 0.002070262 |
| ENSG00000105438 | KDELR1     | 7.054 | 0.251  | 1.190 | 0.000248499 | 0.002079371 |
| ENSG00000221988 | PPT2       | 3.622 | 0.264  | 1.201 | 0.000249566 | 0.002085088 |
| ENSG00000181191 | PJA1       | 4.227 | -0.244 | 0.845 | 0.000249581 | 0.002085088 |
| ENSG00000156076 | WIF1       | 5.780 | -0.883 | 0.542 | 0.000250153 | 0.002088198 |
| ENSG00000161714 | PLCD3      | 5.560 | -0.299 | 0.813 | 0.000251064 | 0.002094136 |
| ENSG00000084676 | NCOA1      | 5.132 | -0.341 | 0.790 | 0.000251576 | 0.002096734 |
| ENSG00000091986 | CCDC80     | 9.502 | 0.372  | 1.294 | 0.000254121 | 0.002116261 |
| ENSG00000225259 | ST13P6     | 3.271 | -0.448 | 0.733 | 0.000254712 | 0.002119499 |
| ENSG00000158008 | EXTL1      | 5.970 | -0.540 | 0.688 | 0.000255966 | 0.002126423 |
| ENSG00000147457 | CHMP7      | 4.383 | 0.263  | 1.200 | 0.000256166 | 0.002126423 |
| ENSG00000197442 | MAP3K5     | 4.442 | -0.602 | 0.659 | 0.000256331 | 0.002126423 |
| ENSG00000117155 | SSX2IP     | 3.037 | -0.363 | 0.778 | 0.000256357 | 0.002126423 |
| ENSG00000099331 | MYO9B      | 6.403 | -0.315 | 0.804 | 0.000257373 | 0.002132935 |
| ENSG00000103152 | MPG        | 4.059 | 0.447  | 1.363 | 0.00025755  | 0.002132935 |
| ENSG00000167930 | FAM234A    | 4.639 | 0.523  | 1.437 | 0.000257971 | 0.002134739 |
| ENSG00000273015 |            | 3.302 | -0.268 | 0.830 | 0.000259349 | 0.002144197 |
| ENSG00000069188 | SDK2       | 7.274 | 0.548  | 1.462 | 0.000259524 | 0.002144197 |
| ENSG00000184277 | TM2D3      | 5.467 | -0.214 | 0.862 | 0.000260638 | 0.002151706 |
| ENSG00000169371 | SNUPN      | 2.661 | -0.279 | 0.824 | 0.000261048 | 0.002153392 |
| ENSG00000133083 | DCLK1      | 2.664 | 1.568  | 2.965 | 0.000270279 | 0.002226223 |
| ENSG00000189180 | ZNF33A     | 5.123 | -0.295 | 0.815 | 0.000270433 | 0.002226223 |
| ENSG00000116793 | PHTF1      | 3.194 | 0.292  | 1.224 | 0.000270515 | 0.002226223 |
| ENSG00000115289 | PCGF1      | 3.564 | 0.347  | 1.272 | 0.000271531 | 0.002232828 |
| ENSG00000182175 | RGMA       | 4.920 | -0.482 | 0.716 | 0.000274396 | 0.002254615 |
| ENSG00000161677 | JOSD2      | 4.441 | 0.533  | 1.447 | 0.00027626  | 0.002267746 |
| ENSG00000100968 | NFATC4     | 5.864 | 0.486  | 1.401 | 0.000276605 | 0.002267746 |
| ENSG00000108813 | DLX4       | 4.145 | 0.778  | 1.715 | 0.000276644 | 0.002267746 |
| ENSG00000152229 | PSTPIP2    | 2.608 | -0.348 | 0.785 | 0.000277781 | 0.002275284 |
| ENSG00000108946 | PRKAR1A    | 7.604 | -0.239 | 0.847 | 0.000280011 | 0.002291759 |
| ENSG00000102466 | FGF14      | 2.911 | -0.725 | 0.605 | 0.00028417  | 0.002323981 |
| ENSG00000130522 | JUND       | 6.675 | 0.441  | 1.358 | 0.000284938 | 0.002328436 |
| ENSG00000149115 | TNKS1BP1   | 6.445 | 0.237  | 1.179 | 0.000286534 | 0.002339658 |
| ENSG00000264247 | LINC00909  | 3.269 | -0.290 | 0.818 | 0.000290123 | 0.002367115 |
| ENSG00000260336 |            | 4.464 | -0.247 | 0.842 | 0.000294594 | 0.002401724 |
| ENSG00000173698 | ADGRG2     | 7.057 | 0.605  | 1.521 | 0.000297459 | 0.002423192 |
| ENSG00000163807 | KIAA1143   | 4.565 | -0.238 | 0.848 | 0.000298202 | 0.002427355 |
| ENSG00000103591 | AAGAB      | 4.207 | 0.283  | 1.217 | 0.00029874  | 0.002429848 |
| ENSG00000179476 | C14orf28   | 3.516 | -0.343 | 0.788 | 0.000301112 | 0.002447239 |
| ENSG00000136840 | ST6GALNAC4 | 4.740 | 0.321  | 1.249 | 0.000302559 | 0.002455918 |
| ENSG00000143819 | EPHX1      | 5.041 | -0.486 | 0.714 | 0.000302649 | 0.002455918 |
| ENSG00000161011 | SQSTM1     | 6.581 | -0.342 | 0.789 | 0.000303871 | 0.002463043 |
| ENSG00000134291 | TMEM106C   | 5.488 | -0.285 | 0.821 | 0.000303998 | 0.002463043 |
| ENSG00000198948 | MFAP3L     | 5.026 | -0.383 | 0.767 | 0.000305763 | 0.002475424 |
| ENSG00000185800 | DMWD       | 4.337 | 0.298  | 1.230 | 0.000306003 | 0.002475452 |
| ENSG00000138380 | CARF       | 3.624 | -0.564 | 0.676 | 0.000307443 | 0.002485184 |
| ENSG00000153879 | CEBPG      | 4.427 | 0.288  | 1.221 | 0.000308938 | 0.002495342 |
| ENSG00000139263 | LRIG3      | 6.242 | -0.504 | 0.705 | 0.000309434 | 0.002497418 |

|                 |            |        |        |       |             |             |
|-----------------|------------|--------|--------|-------|-------------|-------------|
| ENSG00000124225 | PMEPA1     | 8.372  | 0.360  | 1.284 | 0.0003106   | 0.002504899 |
| ENSG00000211445 | GPX3       | 10.729 | -0.527 | 0.694 | 0.000313747 | 0.002527586 |
| ENSG00000138398 | PPIG       | 5.776  | -0.234 | 0.850 | 0.000313896 | 0.002527586 |
| ENSG00000149923 | PPP4C      | 4.910  | 0.413  | 1.331 | 0.000316303 | 0.002543493 |
| ENSG00000150403 | TMCO3      | 7.144  | 0.325  | 1.253 | 0.000316357 | 0.002543493 |
| ENSG00000162341 | TPCN2      | 4.148  | 0.318  | 1.247 | 0.000319794 | 0.002569154 |
| ENSG00000143740 | SNAP47     | 5.104  | 0.309  | 1.239 | 0.000322286 | 0.002587182 |
| ENSG00000047457 | CP         | 7.213  | -0.796 | 0.576 | 0.000323031 | 0.002591181 |
| ENSG00000103365 | GGA2       | 5.755  | -0.249 | 0.841 | 0.000325929 | 0.002612423 |
| ENSG00000131386 | GALNT15    | 8.738  | 0.620  | 1.537 | 0.000328121 | 0.002627981 |
| ENSG00000152767 | FARP1      | 6.187  | 0.290  | 1.223 | 0.000331172 | 0.002649223 |
| ENSG00000175155 | YPEL2      | 5.363  | -0.403 | 0.756 | 0.000331279 | 0.002649223 |
| ENSG00000189319 | FAM53B     | 3.933  | -0.312 | 0.806 | 0.000335279 | 0.002679164 |
| ENSG00000121297 | TSHZ3      | 3.150  | 0.435  | 1.352 | 0.000337009 | 0.002690927 |
| ENSG00000165959 | CLMN       | 3.102  | 0.539  | 1.453 | 0.000344315 | 0.00274717  |
| ENSG00000173218 | VANGL1     | 4.011  | 0.462  | 1.378 | 0.000346348 | 0.002761291 |
| ENSG00000052749 | RRP12      | 4.441  | 0.340  | 1.266 | 0.000348774 | 0.002778513 |
| ENSG00000105254 | TBCB       | 5.701  | 0.344  | 1.270 | 0.000349323 | 0.002780767 |
| ENSG00000164904 | ALDH7A1    | 4.473  | -0.238 | 0.848 | 0.000350891 | 0.002791129 |
| ENSG00000070759 | TESK2      | 3.160  | -0.361 | 0.779 | 0.00035914  | 0.002854574 |
| ENSG00000143162 | CREG1      | 6.761  | -0.294 | 0.816 | 0.000359808 | 0.002857714 |
| ENSG00000138835 | RGS3       | 6.997  | 0.385  | 1.306 | 0.000360856 | 0.002862721 |
| ENSG00000142632 | ARHGEF19   | 4.696  | 0.339  | 1.265 | 0.000360985 | 0.002862721 |
| ENSG00000125962 | ARMCX5     | 3.234  | -0.295 | 0.815 | 0.000362529 | 0.002872786 |
| ENSG00000135535 | CD164      | 7.916  | -0.217 | 0.860 | 0.000363461 | 0.002877997 |
| ENSG00000198369 | SPRED2     | 4.472  | -0.449 | 0.733 | 0.000363808 | 0.002878568 |
| ENSG00000213523 | SRA1       | 4.861  | 0.407  | 1.326 | 0.000364094 | 0.002878649 |
| ENSG00000177706 | FAM20C     | 8.348  | 0.374  | 1.296 | 0.00036573  | 0.002887547 |
| ENSG00000242259 | C22orf39   | 3.920  | -0.285 | 0.821 | 0.000365771 | 0.002887547 |
| ENSG00000139112 | GABARAPL1  | 6.062  | 0.359  | 1.282 | 0.000366712 | 0.002891757 |
| ENSG00000116132 | PRRX1      | 7.691  | -0.308 | 0.808 | 0.000366933 | 0.002891757 |
| ENSG00000104765 | BNIP3L     | 7.311  | -0.283 | 0.822 | 0.000367133 | 0.002891757 |
| ENSG00000147408 | CSGALNACT1 | 8.376  | -0.448 | 0.733 | 0.00036817  | 0.002897748 |
| ENSG00000162735 | PEX19      | 4.843  | -0.221 | 0.858 | 0.000371932 | 0.00292516  |
| ENSG00000161509 | GRIN2C     | 2.842  | -0.735 | 0.601 | 0.000372775 | 0.002929586 |
| ENSG00000156968 | MPV17L     | 3.270  | -0.277 | 0.825 | 0.000373234 | 0.002930995 |
| ENSG00000168438 | CDC40      | 3.634  | -0.374 | 0.771 | 0.000375276 | 0.002944822 |
| ENSG00000046604 | DSG2       | 5.511  | 0.762  | 1.695 | 0.000375609 | 0.002945223 |
| ENSG00000167005 | NUDT21     | 6.082  | -0.314 | 0.804 | 0.000376772 | 0.002952131 |
| ENSG00000134590 | FAM127A    | 6.621  | 0.302  | 1.233 | 0.000377652 | 0.002956815 |
| ENSG00000140836 | ZFH3       | 5.271  | 0.422  | 1.340 | 0.000379923 | 0.002972376 |
| ENSG00000143365 | RORC       | 5.075  | -0.424 | 0.745 | 0.000381492 | 0.002982415 |
| ENSG00000070961 | ATP2B1     | 5.370  | -0.303 | 0.811 | 0.000381809 | 0.002982669 |
| ENSG00000176720 | BOK        | 4.949  | -0.426 | 0.745 | 0.000383194 | 0.00299126  |
| ENSG0000014919  | COX15      | 4.263  | -0.273 | 0.827 | 0.000385602 | 0.003007807 |
| ENSG00000063245 | EPN1       | 5.627  | 0.314  | 1.243 | 0.000386397 | 0.003011767 |
| ENSG00000145075 | CCDC39     | 2.928  | -0.676 | 0.626 | 0.000388272 | 0.003024131 |
| ENSG00000241058 | NSUN6      | 3.420  | -0.352 | 0.784 | 0.000389599 | 0.003032213 |
| ENSG00000198856 | OSTC       | 6.798  | 0.375  | 1.297 | 0.000391707 | 0.003046349 |
| ENSG00000172992 | DCAKD      | 4.842  | -0.302 | 0.811 | 0.00039247  | 0.003048955 |
| ENSG00000196646 | ZNF136     | 2.693  | -0.393 | 0.761 | 0.000392686 | 0.003048955 |
| ENSG00000144134 | RABL2A     | 3.285  | -0.274 | 0.827 | 0.000392916 | 0.003048955 |

|                 |           |        |        |       |             |             |
|-----------------|-----------|--------|--------|-------|-------------|-------------|
| ENSG00000083444 | PLOD1     | 8.602  | 0.298  | 1.229 | 0.000395658 | 0.003067961 |
| ENSG00000145022 | TCTA      | 4.765  | -0.243 | 0.845 | 0.000396487 | 0.003072114 |
| ENSG00000127993 | RBM48     | 3.448  | -0.297 | 0.814 | 0.000401391 | 0.003107811 |
| ENSG00000138107 | ACTR1A    | 5.726  | 0.334  | 1.260 | 0.000405152 | 0.00313461  |
| ENSG00000116133 | DHCR24    | 4.998  | 0.513  | 1.427 | 0.000407212 | 0.003148222 |
| ENSG00000157600 | TMEM164   | 3.546  | 0.315  | 1.244 | 0.000407562 | 0.003148602 |
| ENSG00000170638 | TRABD     | 4.122  | 0.260  | 1.198 | 0.000412431 | 0.00318387  |
| ENSG00000060069 | CTDP1     | 3.658  | 0.309  | 1.239 | 0.000413523 | 0.003189336 |
| ENSG00000167186 | COQ7      | 3.594  | -0.256 | 0.837 | 0.000413748 | 0.003189336 |
| ENSG00000117054 | ACADM     | 4.935  | -0.290 | 0.818 | 0.000414382 | 0.003191871 |
| ENSG00000116922 | C1orf109  | 3.383  | -0.409 | 0.753 | 0.000415728 | 0.003199885 |
| ENSG00000110693 | SOX6      | 4.348  | -0.625 | 0.648 | 0.000416739 | 0.003205306 |
| ENSG00000198860 | TSEN15    | 4.330  | 0.240  | 1.181 | 0.000417396 | 0.003208003 |
| ENSG00000134531 | EMP1      | 7.739  | 0.474  | 1.389 | 0.000417818 | 0.003208895 |
| ENSG00000130429 | ARPC1B    | 5.881  | 0.581  | 1.496 | 0.000419654 | 0.003220632 |
| ENSG00000142186 | SCYL1     | 6.332  | 0.242  | 1.183 | 0.000420235 | 0.003221768 |
| ENSG00000161010 | MRNIP     | 5.043  | -0.347 | 0.786 | 0.000420418 | 0.003221768 |
| ENSG00000041982 | TNC       | 11.345 | 0.685  | 1.607 | 0.000421187 | 0.003222975 |
| ENSG00000107404 | DVL1      | 5.913  | 0.224  | 1.168 | 0.000421191 | 0.003222975 |
| ENSG00000149792 | MRPL49    | 5.160  | -0.255 | 0.838 | 0.000426436 | 0.003260727 |
| ENSG00000182107 | TMEM30B   | 4.240  | -0.367 | 0.776 | 0.000428699 | 0.003275635 |
| ENSG00000170144 | HNRNPA3   | 6.959  | -0.202 | 0.869 | 0.000432143 | 0.00329954  |
| ENSG00000106624 | AEBP1     | 11.397 | 0.313  | 1.242 | 0.000433409 | 0.003306795 |
| ENSG00000086189 | DIMT1     | 4.157  | -0.243 | 0.845 | 0.000433731 | 0.003306842 |
| ENSG00000163947 | ARHGEF3   | 2.786  | -0.389 | 0.764 | 0.000434087 | 0.003307147 |
| ENSG00000116791 | CRYZ      | 5.116  | -0.285 | 0.821 | 0.00044098  | 0.003354958 |
| ENSG00000111669 | TPI1      | 8.834  | 0.376  | 1.297 | 0.000441003 | 0.003354958 |
| ENSG00000120675 | DNAJC15   | 4.625  | 0.353  | 1.278 | 0.00044313  | 0.003368693 |
| ENSG00000173818 | ENDOV     | 3.763  | -0.342 | 0.789 | 0.000443754 | 0.003369183 |
| ENSG00000163875 | MEAF6     | 5.030  | -0.195 | 0.874 | 0.00044412  | 0.003369183 |
| ENSG00000129009 | ISLR      | 9.782  | 0.458  | 1.374 | 0.000444161 | 0.003369183 |
| ENSG00000131652 | THOC6     | 3.967  | 0.432  | 1.349 | 0.00044781  | 0.003394404 |
| ENSG00000007541 | PIGQ      | 4.972  | 0.299  | 1.231 | 0.000449086 | 0.003396903 |
| ENSG00000122641 | INHBA     | 8.330  | 0.927  | 1.902 | 0.000449324 | 0.003396903 |
| ENSG00000119333 | WDR34     | 5.222  | 0.446  | 1.362 | 0.000449327 | 0.003396903 |
| ENSG00000196151 | WDSUB1    | 2.667  | -0.271 | 0.829 | 0.000449583 | 0.003396903 |
| ENSG00000198734 | F5        | 6.317  | 0.758  | 1.692 | 0.000449762 | 0.003396903 |
| ENSG00000109736 | MFSD10    | 5.561  | 0.359  | 1.283 | 0.000451355 | 0.00340567  |
| ENSG00000147679 | UTP23     | 3.915  | -0.285 | 0.821 | 0.000451573 | 0.00340567  |
| ENSG00000172893 | DHCR7     | 4.848  | 0.375  | 1.296 | 0.000457828 | 0.003450357 |
| ENSG00000183864 | TOB2      | 5.142  | -0.232 | 0.851 | 0.00046092  | 0.003471156 |
| ENSG00000101849 | TBL1X     | 3.792  | -0.351 | 0.784 | 0.000464379 | 0.003492393 |
| ENSG00000179163 | FUCA1     | 5.213  | -0.297 | 0.814 | 0.000464407 | 0.003492393 |
| ENSG00000132740 | IGHMBP2   | 4.317  | 0.252  | 1.191 | 0.000464753 | 0.00349249  |
| ENSG00000185963 | BICD2     | 4.586  | 0.317  | 1.246 | 0.000466772 | 0.00350514  |
| ENSG00000142920 | AZIN2     | 3.744  | 0.314  | 1.243 | 0.000467156 | 0.003505511 |
| ENSG00000146729 | GBAS      | 4.638  | -0.192 | 0.875 | 0.000468026 | 0.00350796  |
| ENSG00000120910 | PPP3CC    | 3.826  | 0.244  | 1.184 | 0.000468153 | 0.00350796  |
| ENSG00000167220 | HDHD2     | 3.227  | -0.493 | 0.710 | 0.000470765 | 0.003525014 |
| ENSG00000129187 | DCTD      | 6.031  | -0.237 | 0.848 | 0.000471455 | 0.003527656 |
| ENSG00000136870 | ZNF189    | 3.669  | -0.341 | 0.789 | 0.000480895 | 0.003595723 |
| ENSG00000227051 | C14orf132 | 5.847  | 0.320  | 1.248 | 0.000481375 | 0.003596739 |

|                 |          |        |        |       |             |             |
|-----------------|----------|--------|--------|-------|-------------|-------------|
| ENSG00000075618 | FSCN1    | 6.511  | 0.266  | 1.203 | 0.000482219 | 0.003600476 |
| ENSG00000144476 | ACKR3    | 7.512  | 0.484  | 1.399 | 0.000484871 | 0.003617701 |
| ENSG00000163430 | FSTL1    | 9.617  | 0.425  | 1.343 | 0.00048546  | 0.00361951  |
| ENSG00000139631 | CSAD     | 5.040  | -0.335 | 0.793 | 0.000487628 | 0.003633092 |
| ENSG00000117410 | ATP6V0B  | 5.662  | 0.449  | 1.365 | 0.000490632 | 0.003652871 |
| ENSG00000112280 | COL9A1   | 7.202  | -1.414 | 0.375 | 0.000496499 | 0.003693924 |
| ENSG00000108039 | XPNPEP1  | 5.158  | 0.210  | 1.157 | 0.000502969 | 0.003739399 |
| ENSG00000178761 | FAM219B  | 5.414  | -0.218 | 0.860 | 0.0005036   | 0.003741439 |
| ENSG00000135069 | PSAT1    | 2.868  | 0.903  | 1.870 | 0.000506237 | 0.003758358 |
| ENSG00000109846 | CRYAB    | 7.163  | 0.526  | 1.440 | 0.000512041 | 0.003798759 |
| ENSG00000166123 | GPT2     | 5.153  | -0.305 | 0.809 | 0.000515549 | 0.003821349 |
| ENSG00000197943 | PLCG2    | 3.695  | -0.357 | 0.781 | 0.000515996 | 0.003821349 |
| ENSG00000104904 | OAZ1     | 8.391  | 0.440  | 1.357 | 0.000516182 | 0.003821349 |
| ENSG00000214135 |          | 3.324  | -0.412 | 0.751 | 0.000522492 | 0.003865333 |
| ENSG00000260708 |          | 2.731  | -0.494 | 0.710 | 0.00052673  | 0.003891894 |
| ENSG00000110717 | NDUFS8   | 4.795  | 0.584  | 1.499 | 0.000526826 | 0.003891894 |
| ENSG00000089048 | ESF1     | 3.799  | -0.329 | 0.796 | 0.000528455 | 0.003901179 |
| ENSG00000253719 | ATXN7L3B | 5.767  | -0.285 | 0.821 | 0.000529292 | 0.003904602 |
| ENSG00000146373 | RNF217   | 5.887  | -0.421 | 0.747 | 0.00053099  | 0.003913937 |
| ENSG00000109436 | TBC1D9   | 2.814  | 0.561  | 1.476 | 0.000531305 | 0.003913937 |
| ENSG00000141858 | SAMD1    | 3.745  | 0.422  | 1.340 | 0.000535407 | 0.003941035 |
| ENSG00000267809 | NDUFV2P1 | 3.146  | 0.369  | 1.291 | 0.000535737 | 0.003941035 |
| ENSG00000181541 | MAB21L2  | 2.930  | -0.914 | 0.531 | 0.000536331 | 0.003942635 |
| ENSG00000095383 | TBC1D2   | 2.806  | 0.499  | 1.413 | 0.000537923 | 0.003951566 |
| ENSG00000110057 | UNC93B1  | 4.035  | 0.454  | 1.370 | 0.000540985 | 0.00397127  |
| ENSG00000196323 | ZBTB44   | 4.518  | -0.378 | 0.769 | 0.00054345  | 0.00398657  |
| ENSG00000162241 | SLC25A45 | 3.523  | -0.342 | 0.789 | 0.000544911 | 0.003991913 |
| ENSG00000170899 | GSTA4    | 5.773  | -0.214 | 0.862 | 0.000544941 | 0.003991913 |
| ENSG00000182481 | KPNA2    | 3.387  | 0.448  | 1.364 | 0.000546734 | 0.004002247 |
| ENSG00000159713 | TPPP3    | 7.289  | 1.093  | 2.133 | 0.000547357 | 0.004004008 |
| ENSG00000171314 | PGAM1    | 6.591  | 0.287  | 1.220 | 0.000551673 | 0.004032761 |
| ENSG00000152818 | UTRN     | 6.476  | -0.499 | 0.707 | 0.000553254 | 0.004041495 |
| ENSG00000126226 | PCID2    | 4.887  | -0.192 | 0.876 | 0.000556598 | 0.004063085 |
| ENSG00000172260 | NEGR1    | 3.909  | -0.396 | 0.760 | 0.000557192 | 0.004064588 |
| ENSG00000153246 | PLA2R1   | 5.001  | -0.377 | 0.770 | 0.000558948 | 0.004074562 |
| ENSG00000044115 | CTNNA1   | 7.982  | 0.219  | 1.164 | 0.00056169  | 0.004090187 |
| ENSG00000139998 | RAB15    | 3.601  | 0.412  | 1.330 | 0.00056214  | 0.004090187 |
| ENSG00000159840 | ZYX      | 5.396  | 0.378  | 1.299 | 0.000562264 | 0.004090187 |
| ENSG00000145782 | ATG12    | 5.216  | -0.189 | 0.877 | 0.00056457  | 0.004104112 |
| ENSG00000117450 | PRDX1    | 7.688  | 0.359  | 1.282 | 0.000569315 | 0.00413573  |
| ENSG00000104381 | GDAP1    | 2.630  | -0.371 | 0.773 | 0.000573089 | 0.004160264 |
| ENSG00000162733 | DDR2     | 8.594  | -0.415 | 0.750 | 0.000582653 | 0.004226761 |
| ENSG00000133275 | CSNK1G2  | 5.116  | 0.228  | 1.171 | 0.000585239 | 0.004242578 |
| ENSG00000167397 | VKORC1   | 5.491  | 0.663  | 1.583 | 0.000585989 | 0.004245078 |
| ENSG00000002587 | HS3ST1   | 4.632  | 0.448  | 1.364 | 0.000590336 | 0.00427361  |
| ENSG00000128918 | ALDH1A2  | 6.263  | -0.474 | 0.720 | 0.000595219 | 0.004305982 |
| ENSG00000134333 | LDHA     | 10.273 | 0.326  | 1.253 | 0.000596742 | 0.00431261  |
| ENSG00000071564 | TCF3     | 4.765  | 0.255  | 1.193 | 0.000596959 | 0.00431261  |
| ENSG00000183726 | TMEM50A  | 5.614  | 0.340  | 1.266 | 0.0006004   | 0.004334475 |
| ENSG00000102900 | NUP93    | 3.925  | 0.258  | 1.196 | 0.000602807 | 0.004346113 |
| ENSG00000136717 | BIN1     | 5.443  | 0.388  | 1.308 | 0.000602843 | 0.004346113 |
| ENSG00000120820 | GLT8D2   | 6.523  | -0.314 | 0.804 | 0.000604831 | 0.004357445 |

|                 |           |        |        |       |             |             |
|-----------------|-----------|--------|--------|-------|-------------|-------------|
| ENSG00000185347 | C14orf80  | 3.427  | 0.621  | 1.538 | 0.000606259 | 0.004364729 |
| ENSG00000107186 | MPDZ      | 5.537  | -0.575 | 0.671 | 0.000606818 | 0.004365755 |
| ENSG00000198768 | APCDD1L   | 3.842  | 1.070  | 2.100 | 0.000610469 | 0.004389    |
| ENSG00000188811 | NHLRC3    | 5.044  | -0.333 | 0.794 | 0.000616402 | 0.00442476  |
| ENSG00000157869 | RAB28     | 5.190  | -0.240 | 0.847 | 0.000617111 | 0.00442476  |
| ENSG00000138311 | ZNF365    | 4.053  | 0.419  | 1.337 | 0.000617203 | 0.00442476  |
| ENSG00000131653 | TRAF7     | 4.621  | 0.272  | 1.208 | 0.000617267 | 0.00442476  |
| ENSG00000172296 | SPTLC3    | 2.655  | 0.540  | 1.454 | 0.000617556 | 0.00442476  |
| ENSG00000127616 | SMARCA4   | 5.516  | 0.182  | 1.135 | 0.000618743 | 0.004430231 |
| ENSG00000102100 | SLC35A2   | 4.588  | 0.185  | 1.137 | 0.000619583 | 0.004433214 |
| ENSG00000234899 | SOX9-AS1  | 3.266  | -0.452 | 0.731 | 0.000621946 | 0.004444212 |
| ENSG00000068724 | TTC7A     | 5.046  | 0.230  | 1.173 | 0.000621969 | 0.004444212 |
| ENSG00000247271 | ZBED5-AS1 | 3.132  | -0.342 | 0.789 | 0.000622432 | 0.00444449  |
| ENSG00000164694 | FNDC1     | 7.085  | 0.880  | 1.840 | 0.000625116 | 0.004460609 |
| ENSG00000139329 | LUM       | 12.993 | 0.396  | 1.316 | 0.000626383 | 0.004466607 |
| ENSG00000112473 | SLC39A7   | 8.087  | 0.220  | 1.165 | 0.000629594 | 0.004486447 |
| ENSG00000007080 | CCDC124   | 5.254  | 0.438  | 1.355 | 0.000631399 | 0.004496246 |
| ENSG00000147065 | MSN       | 8.021  | 0.320  | 1.248 | 0.000633215 | 0.004506116 |
| ENSG00000188257 | PLA2G2A   | 11.456 | -0.510 | 0.702 | 0.000634817 | 0.004514447 |
| ENSG00000169683 | LRRC45    | 3.151  | 0.413  | 1.331 | 0.000640796 | 0.004552129 |
| ENSG00000182379 | NXPH4     | 5.111  | 0.521  | 1.435 | 0.000640986 | 0.004552129 |
| ENSG00000005379 | TSPOAP1   | 5.576  | -0.323 | 0.799 | 0.000641701 | 0.004554117 |
| ENSG00000175756 | AURKAIP1  | 5.133  | 0.536  | 1.450 | 0.000645389 | 0.004574119 |
| ENSG00000118849 | RARRES1   | 3.617  | 0.601  | 1.517 | 0.000645393 | 0.004574119 |
| ENSG00000164885 | CDK5      | 2.620  | 0.455  | 1.371 | 0.000647785 | 0.004587969 |
| ENSG00000133226 | SRRM1     | 6.307  | -0.335 | 0.793 | 0.000649055 | 0.00459385  |
| ENSG00000126804 | ZBTB1     | 5.266  | -0.311 | 0.806 | 0.000653547 | 0.004622519 |
| ENSG00000137404 | NRM       | 2.902  | 0.492  | 1.406 | 0.000654376 | 0.004625258 |
| ENSG00000113851 | CRBN      | 4.051  | -0.218 | 0.860 | 0.000660521 | 0.004665544 |
| ENSG00000035862 | TIMP2     | 9.722  | 0.309  | 1.239 | 0.000661944 | 0.004672317 |
| ENSG00000177613 | CSTF2T    | 4.095  | -0.259 | 0.836 | 0.000662373 | 0.004672317 |
| ENSG00000153064 | BANK1     | 4.754  | -0.561 | 0.678 | 0.000668249 | 0.004708393 |
| ENSG00000189337 | KAZN      | 2.720  | 0.411  | 1.330 | 0.000668387 | 0.004708393 |
| ENSG00000096060 | FKBP5     | 6.114  | -0.279 | 0.824 | 0.000674549 | 0.004748609 |
| ENSG00000042493 | CAPG      | 7.192  | 0.475  | 1.390 | 0.000677023 | 0.004762823 |
| ENSG00000255529 | POLR2M    | 4.600  | -0.210 | 0.864 | 0.000678301 | 0.004768609 |
| ENSG00000105669 | COPE      | 5.665  | 0.470  | 1.386 | 0.000680211 | 0.004778824 |
| ENSG00000139291 | TMEM19    | 3.889  | 0.257  | 1.195 | 0.000683716 | 0.004800229 |
| ENSG00000231925 | TAPBP     | 6.809  | 0.220  | 1.165 | 0.000684733 | 0.004803316 |
| ENSG00000106078 | COBL      | 2.805  | 0.699  | 1.624 | 0.000685074 | 0.004803316 |
| ENSG00000134138 | MEIS2     | 3.261  | -0.444 | 0.735 | 0.000686921 | 0.004812719 |
| ENSG00000164442 | CITED2    | 5.005  | -0.296 | 0.815 | 0.000687334 | 0.004812719 |
| ENSG00000188227 | ZNF793    | 2.936  | -0.446 | 0.734 | 0.000692419 | 0.00484508  |
| ENSG00000100644 | HIF1A     | 7.857  | -0.385 | 0.766 | 0.000694532 | 0.00485662  |
| ENSG00000176124 | DLEU1     | 3.053  | -0.321 | 0.800 | 0.000698196 | 0.004876246 |
| ENSG00000131389 | SLC6A6    | 5.194  | 0.685  | 1.608 | 0.00069827  | 0.004876246 |
| ENSG00000088899 | LZTS3     | 2.700  | 0.328  | 1.255 | 0.000700094 | 0.004885723 |
| ENSG00000146085 | MUT       | 4.844  | -0.246 | 0.843 | 0.000705116 | 0.004917495 |
| ENSG00000173281 | PPP1R3B   | 4.736  | -0.384 | 0.766 | 0.00071228  | 0.004964143 |
| ENSG00000125912 | NCLN      | 5.388  | 0.309  | 1.239 | 0.000713603 | 0.004970056 |
| ENSG00000162909 | CAPN2     | 7.553  | 0.247  | 1.187 | 0.000714538 | 0.004972395 |
| ENSG00000214160 | ALG3      | 4.545  | 0.304  | 1.235 | 0.000714889 | 0.004972395 |

|                 |           |        |        |       |             |             |
|-----------------|-----------|--------|--------|-------|-------------|-------------|
| ENSG00000165175 | MID1IP1   | 4.226  | 0.230  | 1.173 | 0.000716924 | 0.004983241 |
| ENSG00000163629 | PTPN13    | 4.407  | -0.480 | 0.717 | 0.000717766 | 0.004985783 |
| ENSG00000123609 | NMI       | 3.589  | 0.339  | 1.265 | 0.000725737 | 0.005037809 |
| ENSG00000111087 | GLI1      | 2.601  | -0.737 | 0.600 | 0.000726395 | 0.005039035 |
| ENSG00000084636 | COL16A1   | 8.844  | -0.675 | 0.626 | 0.00072948  | 0.005057086 |
| ENSG00000105204 | DYRK1B    | 3.091  | 0.259  | 1.197 | 0.000730081 | 0.005057898 |
| ENSG00000186908 | ZDHHC17   | 4.745  | -0.339 | 0.791 | 0.000733695 | 0.005074694 |
| ENSG00000228232 | GAPDHP1   | 5.734  | 0.283  | 1.217 | 0.000733938 | 0.005074694 |
| ENSG00000182568 | SATB1     | 4.373  | -0.386 | 0.765 | 0.000733959 | 0.005074694 |
| ENSG00000115355 | CCDC88A   | 6.366  | -0.401 | 0.758 | 0.000736168 | 0.005086606 |
| ENSG00000114107 | CEP70     | 3.594  | -0.235 | 0.850 | 0.000737548 | 0.005092781 |
| ENSG00000065621 | GSTO2     | 3.532  | -0.330 | 0.796 | 0.000738813 | 0.005098153 |
| ENSG00000137193 | PIM1      | 3.856  | 0.593  | 1.509 | 0.000740383 | 0.005105619 |
| ENSG00000196715 | VKORC1L1  | 4.617  | 0.225  | 1.169 | 0.000746151 | 0.005142006 |
| ENSG00000187735 | TCEA1     | 5.669  | -0.223 | 0.857 | 0.000748263 | 0.005153169 |
| ENSG00000154429 | CCSAP     | 2.957  | -0.360 | 0.779 | 0.000749699 | 0.005159668 |
| ENSG00000166444 | ST5       | 4.542  | -0.597 | 0.661 | 0.000752433 | 0.005175077 |
| ENSG00000188706 | ZDHHC9    | 5.503  | 0.317  | 1.246 | 0.000753081 | 0.005176136 |
| ENSG00000118200 | CAMSAP2   | 6.714  | -0.419 | 0.748 | 0.0007541   | 0.005179738 |
| ENSG00000151322 | NPAS3     | 3.950  | -0.315 | 0.804 | 0.000756436 | 0.005192373 |
| ENSG00000170653 | ATF7      | 4.651  | -0.260 | 0.835 | 0.00075735  | 0.005193048 |
| ENSG00000159873 | CCDC117   | 4.402  | -0.265 | 0.832 | 0.000757526 | 0.005193048 |
| ENSG00000121060 | TRIM25    | 4.111  | -0.272 | 0.828 | 0.000760989 | 0.005213374 |
| ENSG00000141441 | GAREM1    | 4.316  | 0.413  | 1.331 | 0.000762863 | 0.00522279  |
| ENSG00000142669 | SH3BGRL3  | 7.345  | 0.348  | 1.273 | 0.000763733 | 0.005225334 |
| ENSG00000161642 | ZNF385A   | 6.336  | 0.294  | 1.226 | 0.000766747 | 0.005239995 |
| ENSG00000134802 | SLC43A3   | 5.132  | -0.511 | 0.702 | 0.000766929 | 0.005239995 |
| ENSG00000142188 | TMEM50B   | 5.020  | -0.224 | 0.856 | 0.000767548 | 0.005239995 |
| ENSG00000172053 | QARS      | 6.681  | 0.257  | 1.195 | 0.000768214 | 0.005239995 |
| ENSG00000256223 | ZNF10     | 4.019  | -0.390 | 0.763 | 0.000768379 | 0.005239995 |
| ENSG00000042753 | AP2S1     | 5.290  | 0.536  | 1.450 | 0.000776354 | 0.00529093  |
| ENSG00000153006 | SREK1IP1  | 5.002  | 0.349  | 1.273 | 0.000777612 | 0.005296057 |
| ENSG00000122862 | SRGN      | 6.292  | -0.300 | 0.812 | 0.00077845  | 0.005298322 |
| ENSG00000118518 | RNF146    | 5.222  | -0.227 | 0.854 | 0.000779971 | 0.005305219 |
| ENSG00000178685 | PARP10    | 4.354  | -0.420 | 0.747 | 0.000782251 | 0.005317163 |
| ENSG00000133318 | RTN3      | 5.706  | 0.314  | 1.243 | 0.000782743 | 0.005317163 |
| ENSG00000198373 | WWP2      | 10.008 | -0.351 | 0.784 | 0.000784257 | 0.005323995 |
| ENSG00000198046 | ZNF667    | 2.602  | -0.426 | 0.744 | 0.000787547 | 0.005342864 |
| ENSG00000184343 | SRPK3     | 3.077  | 0.435  | 1.352 | 0.000789785 | 0.005350514 |
| ENSG00000204650 | LINC02210 | 3.448  | -0.326 | 0.798 | 0.000790458 | 0.005350514 |
| ENSG00000138738 | PRDM5     | 4.410  | -0.422 | 0.747 | 0.000790586 | 0.005350514 |
| ENSG00000119638 | NEK9      | 6.341  | -0.306 | 0.809 | 0.000790719 | 0.005350514 |
| ENSG00000066629 | EML1      | 6.128  | 0.465  | 1.380 | 0.000795548 | 0.005377538 |
| ENSG00000117533 | VAMP4     | 5.218  | -0.274 | 0.827 | 0.00079574  | 0.005377538 |
| ENSG00000156103 | MMP16     | 4.419  | -0.607 | 0.657 | 0.000797662 | 0.005387046 |
| ENSG00000152778 | IFIT5     | 3.710  | -0.238 | 0.848 | 0.000805115 | 0.005433879 |
| ENSG00000114988 | LMAN2L    | 4.199  | -0.236 | 0.849 | 0.000810626 | 0.005467546 |
| ENSG00000152894 | PTPRK     | 4.509  | 0.506  | 1.420 | 0.000811898 | 0.0054726   |
| ENSG00000203965 | EFCAB7    | 2.912  | -0.316 | 0.804 | 0.000814674 | 0.005485261 |
| ENSG00000168556 | ING2      | 3.438  | 0.396  | 1.316 | 0.000814824 | 0.005485261 |
| ENSG00000108771 | DHX58     | 3.119  | -0.381 | 0.768 | 0.000818871 | 0.005508957 |
| ENSG00000186017 | ZNF566    | 2.791  | -0.273 | 0.827 | 0.000819508 | 0.005509708 |

|                 |            |        |        |       |             |             |
|-----------------|------------|--------|--------|-------|-------------|-------------|
| ENSG00000197183 | NOL4L      | 3.908  | 0.344  | 1.270 | 0.00082336  | 0.005530992 |
| ENSG00000140564 | FURIN      | 7.841  | 0.347  | 1.272 | 0.000823731 | 0.005530992 |
| ENSG00000166037 | CEP57      | 5.366  | -0.248 | 0.842 | 0.000838268 | 0.005624992 |
| ENSG00000137207 | YIPF3      | 6.775  | 0.223  | 1.167 | 0.00083909  | 0.005626904 |
| ENSG00000124181 | PLCG1      | 6.071  | -0.292 | 0.817 | 0.000841393 | 0.005638735 |
| ENSG00000100296 | THOC5      | 4.068  | 0.195  | 1.145 | 0.000844193 | 0.005650527 |
| ENSG00000064115 | TM7SF3     | 5.300  | 0.227  | 1.171 | 0.000844232 | 0.005650527 |
| ENSG00000197712 | FAM114A1   | 7.286  | 0.224  | 1.168 | 0.0008477   | 0.005670108 |
| ENSG00000140326 | CDAN1      | 3.912  | -0.297 | 0.814 | 0.00085588  | 0.005721173 |
| ENSG00000185885 | IFITM1     | 5.867  | -0.416 | 0.749 | 0.000860466 | 0.005746554 |
| ENSG00000052850 | ALX4       | 2.678  | -1.238 | 0.424 | 0.000860775 | 0.005746554 |
| ENSG00000246082 | NUDT16P1   | 2.744  | -0.362 | 0.778 | 0.00086485  | 0.005770076 |
| ENSG00000164692 | COL1A2     | 12.678 | 0.789  | 1.727 | 0.000866052 | 0.005773935 |
| ENSG00000104881 | PPP1R13L   | 4.369  | 0.315  | 1.244 | 0.000866531 | 0.005773935 |
| ENSG00000160131 | VMA21      | 4.853  | -0.181 | 0.882 | 0.000869963 | 0.00579188  |
| ENSG00000132321 | IQCA1      | 3.520  | -0.265 | 0.832 | 0.000870331 | 0.00579188  |
| ENSG00000140043 | PTGR2      | 3.504  | -0.330 | 0.795 | 0.00087099  | 0.005792581 |
| ENSG00000176641 | RNF152     | 4.755  | 0.542  | 1.456 | 0.000871878 | 0.005794803 |
| ENSG00000057935 | MTA3       | 4.122  | -0.232 | 0.852 | 0.000875795 | 0.005817146 |
| ENSG00000079459 | FDFT1      | 5.772  | 0.218  | 1.163 | 0.00087776  | 0.005825192 |
| ENSG00000088808 | PPP1R13B   | 4.203  | -0.332 | 0.794 | 0.000878119 | 0.005825192 |
| ENSG00000166562 | SEC11C     | 4.466  | 0.328  | 1.256 | 0.000879627 | 0.005829955 |
| ENSG00000187840 | EIF4EBP1   | 3.709  | 0.597  | 1.512 | 0.000879951 | 0.005829955 |
| ENSG00000169020 | ATP5I      | 2.830  | 0.708  | 1.634 | 0.000888141 | 0.005880492 |
| ENSG00000125703 | ATG4C      | 3.566  | -0.221 | 0.858 | 0.000889489 | 0.005885696 |
| ENSG00000108010 | GLRX3      | 4.225  | 0.327  | 1.255 | 0.00089705  | 0.005931977 |
| ENSG00000144026 | ZNF514     | 3.881  | -0.335 | 0.793 | 0.000898159 | 0.005935562 |
| ENSG00000005206 | SPPL2B     | 5.292  | 0.188  | 1.139 | 0.000900664 | 0.005948363 |
| ENSG00000106460 | TMEM106B   | 5.891  | -0.301 | 0.812 | 0.000913197 | 0.006027332 |
| ENSG00000167552 | TUBA1A     | 6.754  | 0.513  | 1.427 | 0.000917884 | 0.006054445 |
| ENSG00000070423 | RNF126     | 3.809  | 0.307  | 1.238 | 0.000921293 | 0.006073106 |
| ENSG00000196963 |            | 4.142  | -0.402 | 0.757 | 0.000923801 | 0.006085811 |
| ENSG00000008710 | PKD1       | 8.482  | 0.289  | 1.221 | 0.00092926  | 0.006117918 |
| ENSG00000166770 | ZNF667-AS1 | 3.821  | -0.294 | 0.816 | 0.000935852 | 0.00615745  |
| ENSG00000075426 | FOSL2      | 6.569  | 0.395  | 1.315 | 0.000938189 | 0.006167015 |
| ENSG00000137936 | BCAR3      | 2.711  | -0.377 | 0.770 | 0.000938484 | 0.006167015 |
| ENSG00000123159 | GIPC1      | 4.788  | 0.408  | 1.327 | 0.000942289 | 0.006185928 |
| ENSG00000196189 | SEMA4A     | 2.628  | -0.453 | 0.730 | 0.000942544 | 0.006185928 |
| ENSG00000140367 | UBE2Q2     | 6.024  | 0.251  | 1.190 | 0.000944741 | 0.006196458 |
| ENSG00000174718 | KIAA1551   | 3.380  | -0.382 | 0.768 | 0.000948957 | 0.006220213 |
| ENSG00000149575 | SCN2B      | 3.769  | -0.432 | 0.741 | 0.000949897 | 0.006222479 |
| ENSG00000255642 | PABPC1P4   | 2.932  | -0.311 | 0.806 | 0.000952762 | 0.006237346 |
| ENSG00000197021 | CXorf40B   | 4.476  | 0.264  | 1.201 | 0.000954196 | 0.006242825 |
| ENSG00000164825 | DEFB1      | 3.318  | 1.163  | 2.240 | 0.000961266 | 0.006285154 |
| ENSG00000171813 | PWWP2B     | 2.864  | 0.462  | 1.378 | 0.00096347  | 0.006295633 |
| ENSG00000165028 | NIPSNAP3B  | 3.115  | -0.307 | 0.808 | 0.000966381 | 0.006310715 |
| ENSG00000175416 | CLTB       | 5.688  | 0.438  | 1.355 | 0.00096952  | 0.006327263 |
| ENSG00000118579 | MED28      | 4.306  | -0.215 | 0.862 | 0.000971008 | 0.006333026 |
| ENSG00000124216 | SNAI1      | 5.410  | -0.340 | 0.790 | 0.00098335  | 0.006409534 |
| ENSG00000188599 | NPIPP1     | 4.088  | 0.433  | 1.351 | 0.000988284 | 0.006437681 |
| ENSG00000092054 | MYH7       | 3.543  | 2.552  | 5.863 | 0.000991849 | 0.006453748 |
| ENSG00000089327 | FXVD5      | 7.678  | 0.396  | 1.316 | 0.000991983 | 0.006453748 |

|                 |           |       |        |       |             |             |
|-----------------|-----------|-------|--------|-------|-------------|-------------|
| ENSG0000063046  | EIF4B     | 7.795 | -0.223 | 0.857 | 0.001003827 | 0.006526749 |
| ENSG00000177731 | FLII      | 6.754 | 0.180  | 1.133 | 0.001007427 | 0.006546086 |
| ENSG00000198517 | MAFK      | 3.252 | 0.556  | 1.471 | 0.001011351 | 0.006566359 |
| ENSG00000176102 | CSTF3     | 3.601 | -0.218 | 0.860 | 0.001011801 | 0.006566359 |
| ENSG00000128833 | MYO5C     | 3.305 | -0.600 | 0.660 | 0.001012868 | 0.006569208 |
| ENSG00000088970 | KIZ       | 4.144 | -0.242 | 0.846 | 0.001014687 | 0.006576933 |
| ENSG00000169026 | MFSD7     | 3.794 | 0.287  | 1.220 | 0.001018493 | 0.006597515 |
| ENSG00000197296 | FITM2     | 4.337 | 0.377  | 1.299 | 0.001021715 | 0.006614297 |
| ENSG00000261713 | SSTR5-AS1 | 4.071 | 0.383  | 1.304 | 0.00102839  | 0.006653389 |
| ENSG00000204592 | HLA-E     | 8.416 | -0.355 | 0.782 | 0.001030123 | 0.006656787 |
| ENSG00000119684 | MLH3      | 4.216 | -0.194 | 0.874 | 0.001030187 | 0.006656787 |
| ENSG00000123983 | ACSL3     | 5.940 | -0.243 | 0.845 | 0.001032746 | 0.006669206 |
| ENSG00000113552 | GNPDA1    | 4.803 | -0.188 | 0.878 | 0.001037733 | 0.006697282 |
| ENSG00000133794 | ARNTL     | 2.898 | -0.400 | 0.758 | 0.001040618 | 0.006707666 |
| ENSG00000164054 | SHISA5    | 6.569 | 0.231  | 1.174 | 0.001040624 | 0.006707666 |
| ENSG00000101152 | DNAJC5    | 5.342 | 0.199  | 1.148 | 0.001045263 | 0.006733426 |
| ENSG00000145388 | METTL14   | 4.170 | -0.233 | 0.851 | 0.0010495   | 0.006754728 |
| ENSG00000182307 | C8orf33   | 5.029 | -0.231 | 0.852 | 0.001049861 | 0.006754728 |
| ENSG00000197776 | KLHDC1    | 3.680 | -0.524 | 0.695 | 0.001056022 | 0.006790195 |
| ENSG00000136856 | SLC2A8    | 3.757 | 0.381  | 1.302 | 0.001062176 | 0.006821556 |
| ENSG00000138670 | RASGEF1B  | 2.829 | 0.555  | 1.469 | 0.001062203 | 0.006821556 |
| ENSG00000115556 | PLCD4     | 4.119 | -0.266 | 0.832 | 0.001063798 | 0.006827615 |
| ENSG00000112276 | BVES      | 4.442 | 0.522  | 1.436 | 0.001066997 | 0.006842831 |
| ENSG00000131634 | TMEM204   | 5.443 | -0.365 | 0.777 | 0.001067476 | 0.006842831 |
| ENSG00000123136 | DDX39A    | 4.369 | 0.346  | 1.271 | 0.00106859  | 0.006845775 |
| ENSG00000177628 | GBA       | 5.269 | 0.226  | 1.170 | 0.00107469  | 0.006880647 |
| ENSG00000141568 | FOKK2     | 4.662 | 0.203  | 1.151 | 0.001076439 | 0.006887629 |
| ENSG00000137628 | DDX60     | 2.666 | -0.641 | 0.641 | 0.001079565 | 0.006900911 |
| ENSG00000134575 | ACP2      | 4.626 | 0.326  | 1.253 | 0.001080999 | 0.006900911 |
| ENSG00000187531 | SIRT7     | 3.328 | 0.335  | 1.261 | 0.001081124 | 0.006900911 |
| ENSG00000123143 | PKN1      | 6.154 | 0.354  | 1.278 | 0.001081152 | 0.006900911 |
| ENSG00000170340 | B3GNT2    | 3.010 | 0.589  | 1.504 | 0.00108204  | 0.006902373 |
| ENSG00000122435 | TRMT13    | 3.440 | -0.317 | 0.803 | 0.00108852  | 0.006939481 |
| ENSG00000076604 | TRAF4     | 3.604 | -0.378 | 0.769 | 0.001090318 | 0.006946712 |
| ENSG00000124006 | OBSL1     | 7.128 | -0.313 | 0.805 | 0.001091296 | 0.006948711 |
| ENSG00000185418 | TARSL2    | 4.583 | -0.231 | 0.852 | 0.001098054 | 0.006987498 |
| ENSG00000152684 | PELO      | 5.177 | 0.203  | 1.151 | 0.001099224 | 0.006990692 |
| ENSG00000165029 | ABCA1     | 3.406 | -0.383 | 0.767 | 0.001104371 | 0.00701916  |
| ENSG00000174886 | NDUFA11   | 3.400 | 0.513  | 1.427 | 0.001105049 | 0.007019206 |
| ENSG00000253293 | HOXA10    | 3.940 | -0.316 | 0.803 | 0.001116108 | 0.007085154 |
| ENSG00000248124 | RRN3P1    | 3.004 | -0.372 | 0.773 | 0.001116981 | 0.007086397 |
| ENSG00000107821 | KAZALD1   | 4.949 | 0.379  | 1.300 | 0.001119074 | 0.007095375 |
| ENSG00000107731 | UNC5B     | 6.095 | 0.366  | 1.289 | 0.001125045 | 0.00712462  |
| ENSG00000162009 | SSTR5     | 4.281 | 0.334  | 1.261 | 0.001125047 | 0.00712462  |
| ENSG00000124126 | PREX1     | 6.730 | -0.354 | 0.782 | 0.001128159 | 0.007140007 |
| ENSG00000158042 | MRPL17    | 5.923 | 0.336  | 1.263 | 0.001133132 | 0.007167144 |
| ENSG00000178802 | MPI       | 5.203 | -0.263 | 0.834 | 0.001153164 | 0.007289443 |
| ENSG00000157554 | ERG       | 6.869 | -0.351 | 0.784 | 0.001155774 | 0.007301532 |
| ENSG00000198791 | CNOT7     | 5.095 | -0.233 | 0.851 | 0.001157726 | 0.007309453 |
| ENSG00000149782 | PLCB3     | 4.036 | 0.261  | 1.198 | 0.001161994 | 0.007327755 |
| ENSG00000028839 | TBPL1     | 4.061 | 0.272  | 1.208 | 0.001162044 | 0.007327755 |
| ENSG00000144810 | COL8A1    | 4.738 | 0.854  | 1.807 | 0.001162725 | 0.007327755 |



|                 |           |        |        |       |             |             |
|-----------------|-----------|--------|--------|-------|-------------|-------------|
| ENSG00000125384 | PTGER2    | 3.865  | 0.415  | 1.333 | 0.001164686 | 0.0073357   |
| ENSG00000077721 | UBE2A     | 5.296  | 0.205  | 1.153 | 0.001169171 | 0.007359522 |
| ENSG00000245958 |           | 3.645  | -0.381 | 0.768 | 0.001177449 | 0.007407172 |
| ENSG00000067177 | PHKA1     | 3.697  | -0.300 | 0.813 | 0.001184105 | 0.00744457  |
| ENSG00000156973 | PDE6D     | 3.383  | 0.293  | 1.225 | 0.001185606 | 0.007449534 |
| ENSG00000136243 | NUPL2     | 3.968  | -0.186 | 0.879 | 0.001187492 | 0.00745691  |
| ENSG00000214765 | SEPT7P2   | 3.512  | -0.267 | 0.831 | 0.001188924 | 0.007461426 |
| ENSG00000104825 | NFKBIB    | 4.059  | 0.361  | 1.284 | 0.001196091 | 0.007501206 |
| ENSG00000137726 | FXYD6     | 6.016  | 0.275  | 1.210 | 0.001197098 | 0.007501206 |
| ENSG00000006744 | ELAC2     | 4.802  | 0.195  | 1.145 | 0.001197413 | 0.007501206 |
| ENSG00000197150 | ABCB8     | 4.329  | 0.273  | 1.208 | 0.001200115 | 0.007513636 |
| ENSG00000155252 | PI4K2A    | 4.043  | 0.254  | 1.193 | 0.001207749 | 0.007556914 |
| ENSG00000077549 | CAPZB     | 7.001  | 0.396  | 1.316 | 0.001212059 | 0.00757935  |
| ENSG00000184674 |           | 4.215  | -0.367 | 0.775 | 0.001214789 | 0.007591885 |
| ENSG00000004399 | PLXND1    | 6.299  | -0.276 | 0.826 | 0.001219795 | 0.007618626 |
| ENSG00000163683 | SMIM14    | 7.020  | 0.243  | 1.183 | 0.001223266 | 0.00763575  |
| ENSG00000171867 | PRNP      | 7.011  | -0.166 | 0.891 | 0.00122499  | 0.007641951 |
| ENSG00000161800 | RACGAP1   | 2.705  | 0.372  | 1.294 | 0.001225876 | 0.007642284 |
| ENSG00000183833 | MAATS1    | 3.354  | -0.467 | 0.723 | 0.00122703  | 0.007642284 |
| ENSG00000129353 | SLC44A2   | 7.652  | -0.390 | 0.763 | 0.001227233 | 0.007642284 |
| ENSG00000124107 | SLPI      | 3.982  | -1.176 | 0.442 | 0.001229924 | 0.007654484 |
| ENSG00000159256 | MORC3     | 4.681  | -0.367 | 0.775 | 0.001231659 | 0.007660731 |
| ENSG00000035687 | ADSS      | 5.363  | 0.308  | 1.238 | 0.001234074 | 0.007671193 |
| ENSG00000263753 | LINC00667 | 5.071  | -0.163 | 0.893 | 0.001235414 | 0.007674966 |
| ENSG00000182372 | CLN8      | 3.775  | 0.348  | 1.273 | 0.001237639 | 0.007684227 |
| ENSG00000100379 | KCTD17    | 3.944  | 0.370  | 1.292 | 0.00124051  | 0.007697487 |
| ENSG00000171444 | MCC       | 4.258  | -0.446 | 0.734 | 0.001242649 | 0.00770619  |
| ENSG00000144642 | RBMS3     | 4.153  | -0.394 | 0.761 | 0.001245583 | 0.007719813 |
| ENSG00000167693 | NXN       | 4.371  | 0.281  | 1.215 | 0.001251651 | 0.007752827 |
| ENSG00000136457 | CHAD      | 10.238 | -0.586 | 0.666 | 0.001257968 | 0.007787347 |
| ENSG00000188130 | MAPK12    | 3.339  | -0.494 | 0.710 | 0.001259409 | 0.00778795  |
| ENSG00000083750 | RRAGB     | 3.802  | -0.237 | 0.848 | 0.001259553 | 0.00778795  |
| ENSG00000150764 | DIXDC1    | 7.170  | 0.483  | 1.397 | 0.001261542 | 0.007795645 |
| ENSG00000171603 | CLSTN1    | 8.068  | 0.254  | 1.192 | 0.001264092 | 0.007806791 |
| ENSG00000164073 | MFSD8     | 3.796  | -0.272 | 0.828 | 0.001266619 | 0.007817788 |
| ENSG00000079134 | THOC1     | 4.902  | -0.272 | 0.828 | 0.001268017 | 0.00782115  |
| ENSG00000183508 | FAM46C    | 4.354  | -0.339 | 0.791 | 0.001268658 | 0.00782115  |
| ENSG00000070718 | AP3M2     | 3.035  | -0.277 | 0.825 | 0.001271159 | 0.007831954 |
| ENSG00000155115 | GTF3C6    | 4.523  | 0.359  | 1.282 | 0.001272042 | 0.007832783 |
| ENSG00000184207 | PGP       | 2.653  | 0.557  | 1.471 | 0.001275768 | 0.007851108 |
| ENSG00000108582 | CPD       | 5.711  | -0.339 | 0.790 | 0.00127746  | 0.007856902 |
| ENSG00000028203 | VEZT      | 5.159  | -0.236 | 0.849 | 0.001282974 | 0.007886185 |
| ENSG00000129911 | KLF16     | 3.115  | 0.354  | 1.278 | 0.001286951 | 0.007902785 |
| ENSG00000039523 | FAM65A    | 4.838  | 0.278  | 1.212 | 0.001287185 | 0.007902785 |
| ENSG00000247596 | TWF2      | 3.810  | 0.617  | 1.534 | 0.001292969 | 0.007933358 |
| ENSG00000166669 | ATF7IP2   | 3.985  | -0.296 | 0.815 | 0.00129368  | 0.007933358 |
| ENSG00000172890 | NADSYN1   | 5.234  | 0.201  | 1.149 | 0.001296308 | 0.007944817 |
| ENSG00000051620 | HEBP2     | 5.142  | 0.301  | 1.232 | 0.001302498 | 0.007978084 |
| ENSG00000162692 | VCAM1     | 7.978  | -0.664 | 0.631 | 0.001305696 | 0.007992995 |
| ENSG00000124615 | MOCS1     | 3.312  | -0.263 | 0.833 | 0.001310657 | 0.008018677 |
| ENSG00000101019 | UQCC1     | 4.461  | -0.219 | 0.859 | 0.001314281 | 0.008036152 |
| ENSG00000125877 | ITPA      | 4.216  | 0.516  | 1.430 | 0.001326029 | 0.008103254 |

|                 |         |       |        |       |             |             |
|-----------------|---------|-------|--------|-------|-------------|-------------|
| ENSG00000119599 | DCAF4   | 2.981 | 0.240  | 1.181 | 0.001328099 | 0.008111169 |
| ENSG00000117408 | IPO13   | 4.348 | 0.230  | 1.173 | 0.001330262 | 0.008119639 |
| ENSG00000186376 | ZNF75D  | 3.699 | -0.280 | 0.824 | 0.001332502 | 0.008128575 |
| ENSG00000168476 | REEP4   | 2.775 | 0.443  | 1.359 | 0.001339527 | 0.008166666 |
| ENSG00000159147 | DONSON  | 3.862 | -0.278 | 0.825 | 0.001341063 | 0.008171271 |
| ENSG00000115875 | SRSF7   | 6.510 | -0.199 | 0.871 | 0.001343472 | 0.008181189 |
| ENSG00000134533 | RERG    | 6.799 | -0.342 | 0.789 | 0.001349355 | 0.008212237 |
| ENSG00000167371 | PRRT2   | 3.413 | -0.314 | 0.804 | 0.001351002 | 0.008217484 |
| ENSG00000204673 | AKT1S1  | 5.363 | 0.257  | 1.195 | 0.001359021 | 0.008261461 |
| ENSG00000156232 | WHAMM   | 3.585 | -0.210 | 0.865 | 0.001367592 | 0.008308734 |
| ENSG00000143545 | RAB13   | 6.267 | 0.428  | 1.346 | 0.001374393 | 0.008345212 |
| ENSG00000196263 | ZNF471  | 3.616 | -0.465 | 0.725 | 0.001376104 | 0.008350758 |
| ENSG00000120370 | GORAB   | 4.149 | -0.398 | 0.759 | 0.001378931 | 0.008363067 |
| ENSG00000103091 | WDR59   | 4.980 | -0.233 | 0.851 | 0.00138617  | 0.008402098 |
| ENSG00000099341 | PSMD8   | 6.105 | 0.337  | 1.263 | 0.001389763 | 0.008419004 |
| ENSG00000167771 | RCOR2   | 3.028 | -0.542 | 0.687 | 0.00139994  | 0.008475752 |
| ENSG00000103540 | CCP110  | 4.339 | -0.387 | 0.765 | 0.001404623 | 0.008499186 |
| ENSG00000136950 | ARPC5L  | 4.047 | 0.353  | 1.277 | 0.001409116 | 0.008521445 |
| ENSG00000143363 | PRUNE1  | 4.221 | -0.250 | 0.841 | 0.001416267 | 0.008559746 |
| ENSG00000154727 | GABPA   | 4.773 | -0.250 | 0.841 | 0.001423296 | 0.008597268 |
| ENSG00000197375 | SLC22A5 | 3.344 | -0.408 | 0.754 | 0.001424729 | 0.008600961 |
| ENSG00000197579 | TOPORS  | 4.084 | -0.286 | 0.820 | 0.001429324 | 0.008623726 |
| ENSG00000161204 | ABCF3   | 5.101 | 0.168  | 1.124 | 0.001430817 | 0.008627763 |
| ENSG00000003509 | NDUFAF7 | 3.655 | -0.204 | 0.868 | 0.001436653 | 0.008657962 |
| ENSG00000069329 | VPS35   | 5.911 | -0.191 | 0.876 | 0.001441473 | 0.008682011 |
| ENSG00000070614 | NDST1   | 4.737 | 0.323  | 1.251 | 0.00145811  | 0.008777169 |
| ENSG00000197905 | TEAD4   | 3.049 | 0.406  | 1.325 | 0.001463174 | 0.008802588 |
| ENSG00000145020 | AMT     | 5.055 | -0.341 | 0.790 | 0.001467191 | 0.008820273 |
| ENSG00000121039 | RDH10   | 2.941 | 0.355  | 1.279 | 0.001467799 | 0.008820273 |
| ENSG00000160055 | TMEM234 | 3.064 | 0.326  | 1.253 | 0.001473835 | 0.008851463 |
| ENSG00000155016 | CYP2U1  | 3.760 | -0.322 | 0.800 | 0.001480992 | 0.008889347 |
| ENSG00000105612 | DNASE2  | 5.631 | 0.291  | 1.224 | 0.001485458 | 0.008901777 |
| ENSG00000111875 | ASF1A   | 3.481 | -0.224 | 0.856 | 0.001485989 | 0.008901777 |
| ENSG00000078070 | MCCC1   | 3.851 | -0.264 | 0.833 | 0.001486245 | 0.008901777 |
| ENSG00000151090 | THRB    | 5.587 | -0.369 | 0.774 | 0.001486464 | 0.008901777 |
| ENSG00000167657 | DAPK3   | 4.661 | 0.350  | 1.275 | 0.001487764 | 0.008903907 |
| ENSG00000182986 | ZNF320  | 3.883 | -0.306 | 0.809 | 0.001489314 | 0.008903907 |
| ENSG00000146411 | SLC2A12 | 3.999 | 0.686  | 1.609 | 0.001489372 | 0.008903907 |
| ENSG00000104312 | RIPK2   | 4.017 | 0.256  | 1.194 | 0.001493008 | 0.008920553 |
| ENSG00000117758 | STX12   | 4.735 | -0.174 | 0.887 | 0.001494073 | 0.008921826 |
| ENSG00000126934 | MAP2K2  | 6.063 | 0.324  | 1.252 | 0.001496722 | 0.008929117 |
| ENSG00000178951 | ZBTB7A  | 4.844 | 0.240  | 1.181 | 0.001497    | 0.008929117 |
| ENSG00000101191 | DIDO1   | 5.592 | -0.268 | 0.831 | 0.001498018 | 0.008930095 |
| ENSG00000145439 | CBR4    | 4.139 | -0.256 | 0.837 | 0.001507759 | 0.00898305  |
| ENSG00000129255 | MPDU1   | 4.654 | 0.399  | 1.319 | 0.001508998 | 0.008985318 |
| ENSG00000111596 | CNOT2   | 5.321 | -0.152 | 0.900 | 0.001515855 | 0.009021019 |
| ENSG00000115738 | ID2     | 8.228 | 0.528  | 1.442 | 0.001519674 | 0.009036038 |
| ENSG00000074842 | MYDGF   | 7.113 | 0.436  | 1.352 | 0.001520105 | 0.009036038 |
| ENSG00000082146 | STRADB  | 3.097 | -0.281 | 0.823 | 0.001524584 | 0.009057517 |
| ENSG00000011451 | WIZ     | 4.626 | 0.198  | 1.147 | 0.001535447 | 0.009116301 |
| ENSG00000116815 | CD58    | 3.643 | 0.514  | 1.428 | 0.00153622  | 0.009116301 |
| ENSG00000163913 | IFT122  | 5.042 | -0.290 | 0.818 | 0.001541623 | 0.009143181 |

|                 |          |        |        |       |             |             |
|-----------------|----------|--------|--------|-------|-------------|-------------|
| ENSG00000121486 | TRMT1L   | 4.356  | -0.300 | 0.812 | 0.001546988 | 0.009169803 |
| ENSG00000112079 | STK38    | 4.629  | 0.253  | 1.192 | 0.001556439 | 0.009220604 |
| ENSG00000121864 | ZNF639   | 4.699  | -0.202 | 0.869 | 0.001568268 | 0.009285427 |
| ENSG00000196510 | ANAPC7   | 4.479  | 0.228  | 1.171 | 0.001575346 | 0.009322057 |
| ENSG00000169762 | TAPT1    | 4.005  | -0.253 | 0.839 | 0.001597536 | 0.009448027 |
| ENSG00000172183 | ISG20    | 4.439  | 0.376  | 1.298 | 0.001604245 | 0.009478118 |
| ENSG00000167508 | MVD      | 4.861  | 0.418  | 1.336 | 0.001604435 | 0.009478118 |
| ENSG00000101194 | SLC17A9  | 5.534  | 0.191  | 1.142 | 0.001613466 | 0.009526095 |
| ENSG00000158747 | NBL1     | 6.827  | 0.852  | 1.805 | 0.001622162 | 0.00956849  |
| ENSG00000130600 | H19      | 10.993 | 0.525  | 1.439 | 0.001622475 | 0.00956849  |
| ENSG00000087076 | HSD17B14 | 2.742  | -0.523 | 0.696 | 0.001625865 | 0.009583085 |
| ENSG00000167797 | CDK2AP2  | 4.466  | 0.364  | 1.287 | 0.001634175 | 0.009623132 |
| ENSG00000050393 | MCUR1    | 3.784  | 0.231  | 1.174 | 0.001634498 | 0.009623132 |
| ENSG00000169251 | NMD3     | 5.547  | -0.208 | 0.866 | 0.001636727 | 0.009630836 |
| ENSG00000105341 | ATP5SL   | 3.933  | 0.203  | 1.151 | 0.001659753 | 0.009760841 |
| ENSG00000219481 | NBPF1    | 5.873  | -0.325 | 0.798 | 0.001661583 | 0.009766114 |
| ENSG00000100462 | PRMT5    | 3.502  | -0.374 | 0.772 | 0.001672259 | 0.009823349 |
| ENSG00000164066 | INTU     | 4.609  | -0.502 | 0.706 | 0.001677495 | 0.009848583 |
| ENSG00000168876 | ANKRD49  | 2.964  | -0.293 | 0.816 | 0.001683305 | 0.009877151 |
| ENSG00000144791 | LIMD1    | 4.079  | -0.278 | 0.825 | 0.001684938 | 0.009880975 |
| ENSG00000133619 | KRBA1    | 4.019  | -0.256 | 0.838 | 0.001685845 | 0.009880975 |
| ENSG00000141741 | MIEN1    | 3.288  | 0.527  | 1.441 | 0.001694337 | 0.009925192 |
| ENSG00000099860 | GADD45B  | 6.694  | 0.539  | 1.453 | 0.001700783 | 0.009957329 |
| ENSG00000085998 | POMGNT1  | 5.878  | 0.196  | 1.145 | 0.001701725 | 0.009957329 |
| ENSG00000260565 | ERVK13-1 | 3.187  | -0.369 | 0.775 | 0.001707947 | 0.009988148 |
| ENSG00000133858 | ZFC3H1   | 4.963  | -0.319 | 0.802 | 0.001709213 | 0.009989974 |
| ENSG00000175066 | GK5      | 4.077  | -0.463 | 0.726 | 0.001718173 | 0.010036738 |
| ENSG00000100014 | SPECC1L  | 4.378  | 0.161  | 1.118 | 0.001720228 | 0.010042117 |
| ENSG00000085721 | RRN3     | 4.949  | -0.255 | 0.838 | 0.001721042 | 0.010042117 |
| ENSG00000152217 | SETBP1   | 5.018  | -0.504 | 0.705 | 0.001721972 | 0.010042117 |
| ENSG00000111276 | CDKN1B   | 5.165  | -0.317 | 0.803 | 0.001725504 | 0.010057112 |
| ENSG00000166340 | TPP1     | 6.177  | -0.195 | 0.874 | 0.001733334 | 0.010091135 |
| ENSG00000132361 | CLUH     | 4.414  | 0.238  | 1.179 | 0.001733783 | 0.010091135 |
| ENSG00000180818 | HOXC10   | 5.517  | -0.215 | 0.862 | 0.001734233 | 0.010091135 |
| ENSG00000055732 | MCOLN3   | 4.506  | 0.395  | 1.315 | 0.001741769 | 0.010127226 |
| ENSG00000167645 | YIF1B    | 5.362  | 0.327  | 1.254 | 0.001742371 | 0.010127226 |
| ENSG00000198954 | KIF1BP   | 5.221  | -0.253 | 0.839 | 0.001745035 | 0.010137084 |
| ENSG00000119004 | CYP20A1  | 3.569  | 0.272  | 1.207 | 0.001760962 | 0.010223931 |
| ENSG00000170275 | CRTAP    | 8.844  | -0.225 | 0.855 | 0.001762735 | 0.010227053 |
| ENSG00000106565 | TMEM176B | 3.722  | -1.078 | 0.474 | 0.001763453 | 0.010227053 |
| ENSG00000124380 | SNRNP27  | 3.778  | -0.227 | 0.855 | 0.001765171 | 0.010231347 |
| ENSG00000144233 | AMMECR1L | 4.350  | 0.258  | 1.196 | 0.001768918 | 0.010242269 |
| ENSG00000166478 | ZNF143   | 3.331  | -0.231 | 0.852 | 0.001769013 | 0.010242269 |
| ENSG00000198830 | HMG2     | 6.194  | -0.262 | 0.834 | 0.001777046 | 0.010283094 |
| ENSG00000151229 | SLC2A13  | 3.324  | -0.360 | 0.779 | 0.001788685 | 0.010344728 |
| ENSG00000197258 | EIF4BP6  | 4.300  | -0.246 | 0.843 | 0.0017916   | 0.010355863 |
| ENSG00000109466 | KLHL2    | 4.107  | 0.297  | 1.229 | 0.001795085 | 0.010370282 |
| ENSG00000225138 |          | 2.864  | -0.503 | 0.706 | 0.001798323 | 0.010383257 |
| ENSG00000146112 | PPP1R18  | 5.310  | 0.251  | 1.190 | 0.001800737 | 0.010391464 |
| ENSG00000134884 | ARGLU1   | 6.443  | -0.214 | 0.862 | 0.001808275 | 0.010429214 |
| ENSG00000074047 | GLI2     | 3.635  | -0.434 | 0.740 | 0.001816024 | 0.010468138 |
| ENSG00000109046 | WSB1     | 7.541  | -0.392 | 0.762 | 0.001820297 | 0.010486994 |

|                 |          |       |        |       |             |             |
|-----------------|----------|-------|--------|-------|-------------|-------------|
| ENSG00000136754 | ABI1     | 5.344 | 0.233  | 1.176 | 0.001832762 | 0.010553001 |
| ENSG00000178537 | SLC25A20 | 3.415 | 0.268  | 1.204 | 0.001835734 | 0.010564302 |
| ENSG00000134874 | DZIP1    | 5.124 | -0.253 | 0.839 | 0.00183962  | 0.010580845 |
| ENSG00000173918 | C1QTNF1  | 5.529 | 0.752  | 1.685 | 0.001846761 | 0.010616087 |
| ENSG00000179454 | KLHL28   | 3.977 | -0.389 | 0.763 | 0.001870216 | 0.010745018 |
| ENSG00000135930 | EIF4E2   | 5.525 | 0.233  | 1.175 | 0.001873518 | 0.010755511 |
| ENSG00000105538 | RASIP1   | 2.701 | 0.571  | 1.486 | 0.001874097 | 0.010755511 |
| ENSG00000063241 | ISOC2    | 4.967 | 0.479  | 1.394 | 0.001880125 | 0.010784193 |
| ENSG00000182117 | NOP10    | 5.070 | 0.462  | 1.377 | 0.00188831  | 0.010825206 |
| ENSG00000172725 | CORO1B   | 5.163 | 0.304  | 1.234 | 0.001893192 | 0.010847164 |
| ENSG00000168701 | TMEM208  | 4.706 | 0.421  | 1.339 | 0.001894212 | 0.010847164 |
| ENSG00000101104 | PABPC1L  | 4.246 | -0.364 | 0.777 | 0.001896414 | 0.010853834 |
| ENSG00000112208 | BAG2     | 3.682 | 0.373  | 1.295 | 0.001900681 | 0.01087231  |
| ENSG00000121073 | SLC35B1  | 5.237 | 0.280  | 1.214 | 0.00190601  | 0.010896837 |
| ENSG00000143507 | DUSP10   | 2.715 | -0.425 | 0.745 | 0.001912129 | 0.010925853 |
| ENSG00000184967 | NOC4L    | 3.153 | 0.409  | 1.328 | 0.001916588 | 0.010945358 |
| ENSG00000204186 | ZDBF2    | 4.067 | -0.586 | 0.666 | 0.001918715 | 0.01095153  |
| ENSG00000196072 | BLOC1S2  | 5.067 | 0.267  | 1.203 | 0.001926671 | 0.010990949 |
| ENSG00000157625 | TAB3     | 3.994 | -0.411 | 0.752 | 0.001928528 | 0.010995552 |
| ENSG00000119185 | ITGB1BP1 | 5.860 | 0.266  | 1.202 | 0.001933537 | 0.011018108 |
| ENSG00000072609 | CHFR     | 3.904 | 0.229  | 1.172 | 0.001937172 | 0.011032817 |
| ENSG00000160285 | LSS      | 5.658 | 0.171  | 1.126 | 0.001940425 | 0.011045335 |
| ENSG00000013306 | SLC25A39 | 5.534 | 0.292  | 1.224 | 0.001945249 | 0.011066776 |
| ENSG00000125430 | HS3ST3B1 | 3.471 | -0.574 | 0.672 | 0.001950529 | 0.011090786 |
| ENSG00000141349 | G6PC3    | 4.890 | 0.301  | 1.232 | 0.001954085 | 0.011104974 |
| ENSG00000106415 | GLCCI1   | 3.999 | -0.346 | 0.787 | 0.001958152 | 0.01112205  |
| ENSG00000149577 | SIDT2    | 5.815 | -0.287 | 0.820 | 0.001968393 | 0.011174153 |
| ENSG00000175575 | PAAF1    | 4.100 | -0.262 | 0.834 | 0.001986037 | 0.011268204 |
| ENSG00000160323 | ADAMTS13 | 3.363 | -0.324 | 0.799 | 0.001993338 | 0.011298483 |
| ENSG00000143578 | CREB3L4  | 3.765 | -0.282 | 0.822 | 0.001993533 | 0.011298483 |
| ENSG00000001461 | NIPAL3   | 4.233 | 0.425  | 1.342 | 0.00199487  | 0.011299947 |
| ENSG00000127415 | IDUA     | 4.534 | 0.342  | 1.267 | 0.002002638 | 0.011337813 |
| ENSG00000140526 | ABHD2    | 7.015 | 0.636  | 1.554 | 0.002006504 | 0.011353557 |
| ENSG00000163785 | RYK      | 6.232 | -0.243 | 0.845 | 0.002025655 | 0.011455729 |
| ENSG00000114395 | CYB561D2 | 3.615 | 0.406  | 1.325 | 0.002046935 | 0.011569827 |
| ENSG00000163714 | U2SURP   | 6.378 | -0.306 | 0.809 | 0.002048462 | 0.011572205 |
| ENSG00000004059 | ARF5     | 5.121 | 0.306  | 1.236 | 0.002057649 | 0.011612276 |
| ENSG00000158987 | RAPGEF6  | 2.819 | -0.234 | 0.850 | 0.002058156 | 0.011612276 |
| ENSG00000156535 | CD109    | 8.222 | 0.425  | 1.342 | 0.002059392 | 0.011612276 |
| ENSG00000163873 | GRIK3    | 3.625 | 0.625  | 1.542 | 0.002060176 | 0.011612276 |
| ENSG00000131013 | PPIL4    | 4.525 | -0.248 | 0.842 | 0.002061101 | 0.011612276 |
| ENSG00000083838 | ZNF446   | 2.654 | -0.277 | 0.825 | 0.002077581 | 0.011698828 |
| ENSG00000153558 | FBXL2    | 3.707 | -0.273 | 0.827 | 0.002082869 | 0.0117223   |
| ENSG00000140382 | HMG20A   | 5.098 | -0.259 | 0.836 | 0.002094247 | 0.011776806 |
| ENSG00000131620 | ANO1     | 5.185 | 0.435  | 1.352 | 0.002094804 | 0.011776806 |
| ENSG00000222009 | BTBD19   | 4.471 | 0.455  | 1.371 | 0.002104152 | 0.011823009 |
| ENSG00000134086 | VHL      | 4.498 | -0.297 | 0.814 | 0.002110857 | 0.011854321 |
| ENSG00000158286 | RNF207   | 4.000 | -0.338 | 0.791 | 0.002114004 | 0.011865624 |
| ENSG00000204178 | TMEM57   | 4.853 | 0.195  | 1.145 | 0.002122123 | 0.011904812 |
| ENSG00000153029 | MR1      | 5.221 | -0.190 | 0.876 | 0.002130925 | 0.01194779  |
| ENSG00000143756 | FBXO28   | 4.705 | -0.214 | 0.862 | 0.002136811 | 0.011974377 |
| ENSG00000142856 | ITGB3BP  | 3.685 | -0.214 | 0.862 | 0.002140457 | 0.011988389 |

|                 |            |       |        |       |             |             |
|-----------------|------------|-------|--------|-------|-------------|-------------|
| ENSG00000169083 | AR         | 4.072 | -0.472 | 0.721 | 0.00214311  | 0.011996833 |
| ENSG00000079739 | PGM1       | 7.167 | 0.233  | 1.176 | 0.002145408 | 0.012003279 |
| ENSG00000164329 | PAPD4      | 5.173 | -0.194 | 0.874 | 0.00214785  | 0.012010522 |
| ENSG00000109738 | GLRB       | 3.162 | 0.433  | 1.350 | 0.002155666 | 0.01204274  |
| ENSG00000184402 | SS18L1     | 4.211 | -0.262 | 0.834 | 0.002155913 | 0.01204274  |
| ENSG00000198728 | LDB1       | 5.694 | -0.338 | 0.791 | 0.002180891 | 0.012175769 |
| ENSG00000107938 | EDRF1      | 3.526 | -0.264 | 0.833 | 0.002197217 | 0.012260376 |
| ENSG00000134247 | PTGFRN     | 5.925 | -0.310 | 0.807 | 0.0022092   | 0.012320672 |
| ENSG00000164096 | C4orf3     | 7.671 | -0.253 | 0.839 | 0.002212549 | 0.012332782 |
| ENSG00000166394 | CYB5R2     | 3.306 | 0.226  | 1.170 | 0.00222529  | 0.012397197 |
| ENSG00000109323 | MANBA      | 5.643 | -0.172 | 0.887 | 0.002233046 | 0.012433791 |
| ENSG00000147130 | ZMYM3      | 4.468 | -0.254 | 0.838 | 0.002256332 | 0.012556772 |
| ENSG00000008283 | CYB561     | 4.695 | 0.209  | 1.156 | 0.002258159 | 0.012560257 |
| ENSG00000139163 | ETNK1      | 5.373 | -0.268 | 0.831 | 0.002261847 | 0.012570836 |
| ENSG00000109452 | INPP4B     | 2.913 | 0.468  | 1.383 | 0.002262462 | 0.012570836 |
| ENSG00000163590 | PPM1L      | 3.152 | -0.390 | 0.763 | 0.002267368 | 0.012591409 |
| ENSG00000065485 | PDIA5      | 5.426 | 0.261  | 1.198 | 0.002272776 | 0.012614748 |
| ENSG00000167617 | CDC42EP5   | 4.851 | 0.323  | 1.251 | 0.002274101 | 0.012615418 |
| ENSG00000178988 | MRFAP1L1   | 5.588 | -0.176 | 0.885 | 0.002278154 | 0.012631204 |
| ENSG00000142227 | EMP3       | 7.542 | 0.465  | 1.380 | 0.00228476  | 0.012661125 |
| ENSG00000257621 | PSMA3-AS1  | 5.143 | -0.252 | 0.840 | 0.002298845 | 0.012732441 |
| ENSG00000168906 | MAT2A      | 5.943 | -0.459 | 0.728 | 0.00230754  | 0.012773839 |
| ENSG00000148690 | FRA10AC1   | 4.843 | -0.256 | 0.837 | 0.002318381 | 0.012817987 |
| ENSG00000115935 | WIPF1      | 6.059 | 0.297  | 1.229 | 0.002318479 | 0.012817987 |
| ENSG00000125991 | ERGIC3     | 7.529 | 0.288  | 1.221 | 0.002319189 | 0.012817987 |
| ENSG00000177283 | FZD8       | 7.099 | -0.254 | 0.839 | 0.002321874 | 0.012826057 |
| ENSG00000106991 | ENG        | 6.933 | 0.340  | 1.265 | 0.002323496 | 0.012828247 |
| ENSG00000180398 | MCFD2      | 6.772 | -0.245 | 0.844 | 0.002325679 | 0.012833532 |
| ENSG00000163931 | TKT        | 5.717 | 0.223  | 1.167 | 0.00233664  | 0.012880001 |
| ENSG00000174775 | HRAS       | 4.313 | 0.491  | 1.406 | 0.002337127 | 0.012880001 |
| ENSG00000197070 | ARRDC1     | 3.445 | 0.291  | 1.223 | 0.002337791 | 0.012880001 |
| ENSG00000105723 | GSK3A      | 4.694 | 0.198  | 1.147 | 0.002344236 | 0.012908712 |
| ENSG00000126214 | KLC1       | 4.419 | 0.261  | 1.198 | 0.002349151 | 0.012924519 |
| ENSG00000103174 | NAGPA      | 3.056 | 0.337  | 1.263 | 0.002349576 | 0.012924519 |
| ENSG00000136710 | CCDC115    | 4.580 | -0.217 | 0.860 | 0.002354255 | 0.012943457 |
| ENSG00000124155 | PIGT       | 7.476 | 0.252  | 1.191 | 0.002370941 | 0.013028351 |
| ENSG00000135093 | USP30      | 3.648 | -0.228 | 0.854 | 0.002375667 | 0.013047473 |
| ENSG00000135899 | SP110      | 3.378 | -0.313 | 0.805 | 0.002377196 | 0.013049026 |
| ENSG00000138166 | DUSP5      | 3.111 | 0.789  | 1.728 | 0.002379895 | 0.013056991 |
| ENSG00000164291 | ARSK       | 3.273 | -0.271 | 0.829 | 0.002385727 | 0.013082134 |
| ENSG00000244879 | GABPB1-AS1 | 3.105 | -0.385 | 0.766 | 0.002389658 | 0.013093886 |
| ENSG00000137871 | ZNF280D    | 5.812 | -0.300 | 0.812 | 0.002390372 | 0.013093886 |
| ENSG00000152661 | GJA1       | 7.790 | 0.524  | 1.438 | 0.002391738 | 0.013094513 |
| ENSG00000118197 | DDX59      | 4.156 | -0.241 | 0.846 | 0.002400524 | 0.013135748 |
| ENSG00000139514 | SLC7A1     | 4.582 | 0.476  | 1.391 | 0.002408868 | 0.013174518 |
| ENSG00000130158 | DOCK6      | 4.138 | 0.242  | 1.182 | 0.002440669 | 0.013341477 |
| ENSG00000108387 | SEPT4      | 2.777 | -0.536 | 0.689 | 0.002445812 | 0.013362611 |
| ENSG00000180228 | PRKRA      | 5.045 | 0.162  | 1.119 | 0.002450909 | 0.013383473 |
| ENSG00000175826 | CTDNEP1    | 5.253 | 0.362  | 1.285 | 0.002454415 | 0.013395628 |
| ENSG00000133624 | ZNF767P    | 3.488 | -0.273 | 0.828 | 0.002462179 | 0.013425385 |
| ENSG00000240849 | TMEM189    | 3.745 | 0.369  | 1.291 | 0.002462432 | 0.013425385 |
| ENSG00000035403 | VCL        | 6.063 | 0.311  | 1.241 | 0.002473037 | 0.013476187 |

|                 |           |       |        |       |             |             |
|-----------------|-----------|-------|--------|-------|-------------|-------------|
| ENSG00000133872 | SARAF     | 7.834 | 0.185  | 1.137 | 0.002482788 | 0.013522282 |
| ENSG00000141759 | TXNL4A    | 5.063 | 0.439  | 1.356 | 0.002486469 | 0.013535286 |
| ENSG00000065268 | WDR18     | 3.689 | 0.402  | 1.321 | 0.002488497 | 0.013539289 |
| ENSG00000170464 | DNAJC18   | 3.704 | -0.209 | 0.865 | 0.002511212 | 0.013655777 |
| ENSG00000197930 | ERO1A     | 5.437 | 0.328  | 1.255 | 0.002515969 | 0.013671648 |
| ENSG00000140983 | RHOT2     | 5.869 | 0.273  | 1.208 | 0.002516743 | 0.013671648 |
| ENSG00000130598 | TNNI2     | 2.864 | 1.114  | 2.165 | 0.002523679 | 0.013702218 |
| ENSG00000116237 | ICMT      | 5.583 | 0.260  | 1.198 | 0.002526994 | 0.013713103 |
| ENSG00000107819 | SFXN3     | 6.148 | 0.177  | 1.131 | 0.002546308 | 0.013810753 |
| ENSG00000137955 | RABGGTB   | 5.459 | 0.209  | 1.156 | 0.00257124  | 0.013938757 |
| ENSG00000064309 | CDON      | 8.111 | 0.500  | 1.414 | 0.002574418 | 0.01394876  |
| ENSG00000140545 | MFGE8     | 9.474 | 0.309  | 1.239 | 0.002577435 | 0.013954009 |
| ENSG00000073792 | IGF2BP2   | 3.244 | 0.325  | 1.252 | 0.002578052 | 0.013954009 |
| ENSG00000110171 | TRIM3     | 3.524 | 0.238  | 1.180 | 0.002613647 | 0.01413936  |
| ENSG00000120253 | NUP43     | 4.103 | -0.253 | 0.839 | 0.002615048 | 0.014139627 |
| ENSG00000154783 | FGD5      | 4.734 | 0.307  | 1.237 | 0.002616837 | 0.014141996 |
| ENSG00000243147 | MRPL33    | 5.434 | 0.358  | 1.281 | 0.00262217  | 0.014163507 |
| ENSG00000140682 | TGFB1I1   | 5.146 | 0.246  | 1.186 | 0.00263783  | 0.014240747 |
| ENSG00000143549 | TPM3      | 6.702 | 0.248  | 1.188 | 0.002639986 | 0.01424504  |
| ENSG00000105520 | PLPPR2    | 5.213 | 0.194  | 1.144 | 0.0026552   | 0.014319752 |
| ENSG00000177981 | ASB8      | 4.514 | -0.160 | 0.895 | 0.002657571 | 0.014325159 |
| ENSG00000164713 | BRI3      | 5.590 | 0.458  | 1.374 | 0.002659345 | 0.014327343 |
| ENSG00000087301 | TXNDC16   | 2.950 | -0.351 | 0.784 | 0.002661612 | 0.014332179 |
| ENSG00000125398 | SOX9      | 7.757 | -0.267 | 0.831 | 0.002678212 | 0.014414152 |
| ENSG00000077157 | PPP1R12B  | 4.025 | -0.347 | 0.786 | 0.002679916 | 0.014415908 |
| ENSG00000167380 | ZNF226    | 3.757 | -0.309 | 0.807 | 0.002681773 | 0.014418489 |
| ENSG00000135617 | PRADC1    | 3.867 | 0.446  | 1.362 | 0.002699962 | 0.01450883  |
| ENSG00000155970 | MICU3     | 2.980 | -0.531 | 0.692 | 0.002708416 | 0.014546792 |
| ENSG00000183346 | C10orf107 | 3.362 | -0.270 | 0.830 | 0.002717466 | 0.014587914 |
| ENSG00000139625 | MAP3K12   | 4.028 | -0.281 | 0.823 | 0.002725348 | 0.01462273  |
| ENSG00000157617 | C2CD2     | 5.666 | 0.379  | 1.300 | 0.002756291 | 0.014781173 |
| ENSG00000102753 | KPNA3     | 4.423 | 0.291  | 1.224 | 0.002761394 | 0.014800957 |
| ENSG00000148737 | TCF7L2    | 5.059 | 0.215  | 1.161 | 0.002766187 | 0.01481906  |
| ENSG00000164366 | CCDC127   | 4.658 | 0.191  | 1.142 | 0.002770319 | 0.014833607 |
| ENSG00000162840 | MT2P1     | 6.425 | 0.645  | 1.564 | 0.002778231 | 0.014868363 |
| ENSG00000230487 | PSMG3-AS1 | 3.182 | -0.309 | 0.807 | 0.0027831   | 0.014885384 |
| ENSG00000133687 | TMTC1     | 6.724 | -0.587 | 0.666 | 0.002784255 | 0.014885384 |
| ENSG00000181817 | LSM10     | 4.474 | 0.344  | 1.269 | 0.002805654 | 0.01499213  |
| ENSG00000157181 | C1orf27   | 4.846 | -0.180 | 0.882 | 0.002811248 | 0.015014358 |
| ENSG00000138381 | ASNSD1    | 5.125 | -0.156 | 0.898 | 0.002820107 | 0.015053995 |
| ENSG00000118246 | FASTKD2   | 4.099 | -0.192 | 0.875 | 0.002826333 | 0.015079539 |
| ENSG00000139624 | CERS5     | 5.718 | 0.215  | 1.160 | 0.002837109 | 0.015129322 |
| ENSG00000132716 | DCAF8     | 5.686 | -0.223 | 0.857 | 0.002841719 | 0.015146191 |
| ENSG00000104856 | RELB      | 2.726 | 0.550  | 1.464 | 0.002853572 | 0.015201623 |
| ENSG00000124212 | PTGIS     | 5.690 | 0.421  | 1.339 | 0.002860257 | 0.015229484 |
| ENSG00000163257 | DCAF16    | 4.307 | -0.307 | 0.809 | 0.002867802 | 0.015261895 |
| ENSG00000134762 | DSC3      | 3.984 | 1.179  | 2.264 | 0.002882686 | 0.01533331  |
| ENSG00000100300 | TSPO      | 7.252 | 0.485  | 1.399 | 0.002892234 | 0.015371591 |
| ENSG00000105429 | MEGF8     | 5.716 | 0.198  | 1.147 | 0.002894283 | 0.015371591 |
| ENSG00000177406 |           | 3.001 | -0.269 | 0.830 | 0.002894288 | 0.015371591 |
| ENSG00000129235 | TXNDC17   | 4.078 | 0.446  | 1.362 | 0.00289639  | 0.015374954 |
| ENSG00000162576 | MXRA8     | 8.741 | 0.289  | 1.222 | 0.002898797 | 0.01537769  |

|                 |           |       |        |       |             |             |
|-----------------|-----------|-------|--------|-------|-------------|-------------|
| ENSG00000168077 | SCARA3    | 9.762 | -0.299 | 0.813 | 0.002899843 | 0.01537769  |
| ENSG00000235217 | TSPY26P   | 3.514 | -0.244 | 0.845 | 0.002902044 | 0.015381566 |
| ENSG00000159216 | RUNX1     | 7.300 | 0.287  | 1.220 | 0.002908164 | 0.015389836 |
| ENSG00000139926 | FRMD6     | 5.681 | 0.438  | 1.355 | 0.002908173 | 0.015389836 |
| ENSG00000029153 | ARNTL2    | 3.110 | 0.741  | 1.672 | 0.002908977 | 0.015389836 |
| ENSG00000197358 | BNIP3P1   | 3.993 | -0.412 | 0.751 | 0.00290993  | 0.015389836 |
| ENSG00000116649 | SRM       | 5.810 | 0.326  | 1.253 | 0.002910955 | 0.015389836 |
| ENSG00000092096 | SLC22A17  | 6.870 | 0.280  | 1.214 | 0.00291521  | 0.01540455  |
| ENSG00000235587 | GAPDHP65  | 4.205 | 0.292  | 1.224 | 0.002918724 | 0.01541534  |
| ENSG00000126001 | CEP250    | 5.100 | -0.223 | 0.857 | 0.002925098 | 0.015437661 |
| ENSG00000147601 | TERF1     | 4.751 | -0.214 | 0.862 | 0.0029259   | 0.015437661 |
| ENSG00000120324 | PCDHB10   | 2.777 | -0.346 | 0.787 | 0.002930099 | 0.015442039 |
| ENSG00000155366 | RHOC      | 6.862 | 0.433  | 1.350 | 0.002931332 | 0.015442039 |
| ENSG00000155368 | DBI       | 5.784 | 0.408  | 1.327 | 0.002931534 | 0.015442039 |
| ENSG00000124172 | ATP5E     | 6.894 | 0.585  | 1.500 | 0.00293263  | 0.015442039 |
| ENSG00000111790 | FGFR1OP2  | 5.516 | -0.207 | 0.867 | 0.002954761 | 0.01555075  |
| ENSG00000146938 | NLGN4X    | 2.903 | -0.806 | 0.572 | 0.002962197 | 0.015582051 |
| ENSG00000143320 | CRABP2    | 4.059 | 0.808  | 1.751 | 0.00296426  | 0.015585068 |
| ENSG00000153443 | UBALD1    | 3.168 | 0.338  | 1.264 | 0.002967198 | 0.015592687 |
| ENSG00000103145 | HCFC1R1   | 6.027 | 0.569  | 1.484 | 0.002980765 | 0.01565612  |
| ENSG00000127445 | PIN1      | 4.419 | 0.383  | 1.304 | 0.00299153  | 0.015704783 |
| ENSG00000173848 | NET1      | 6.945 | -0.239 | 0.847 | 0.002995896 | 0.015719819 |
| ENSG00000143771 | CNIH4     | 4.967 | 0.190  | 1.141 | 0.002997906 | 0.015722484 |
| ENSG00000198736 | MSRB1     | 4.166 | 0.265  | 1.201 | 0.00300741  | 0.015764433 |
| ENSG00000174579 | MSL2      | 4.620 | -0.246 | 0.843 | 0.003019258 | 0.015818617 |
| ENSG00000198551 | ZNF627    | 3.093 | -0.296 | 0.815 | 0.00302748  | 0.015853758 |
| ENSG00000139579 | NABP2     | 4.550 | 0.270  | 1.205 | 0.003033396 | 0.015869848 |
| ENSG00000153956 | CACNA2D1  | 3.685 | -0.388 | 0.764 | 0.003033585 | 0.015869848 |
| ENSG00000175602 | CCDC85B   | 4.023 | 0.659  | 1.579 | 0.003040181 | 0.015892313 |
| ENSG00000118402 | ELOVL4    | 4.009 | 0.272  | 1.208 | 0.003041796 | 0.015892313 |
| ENSG00000113460 | BRIX1     | 3.990 | -0.216 | 0.861 | 0.003042755 | 0.015892313 |
| ENSG00000128805 | ARHGAP22  | 4.082 | 0.413  | 1.331 | 0.003043952 | 0.015892313 |
| ENSG00000120696 | KBTBD7    | 3.919 | -0.295 | 0.815 | 0.00306372  | 0.015987549 |
| ENSG00000132507 | EIF5A     | 6.319 | 0.368  | 1.290 | 0.003067604 | 0.01599984  |
| ENSG00000198513 | ATL1      | 3.228 | -0.484 | 0.715 | 0.003070642 | 0.016000471 |
| ENSG00000002330 | BAD       | 2.871 | 0.513  | 1.427 | 0.003071904 | 0.016000471 |
| ENSG00000124159 | MATN4     | 4.939 | -1.520 | 0.349 | 0.003072311 | 0.016000471 |
| ENSG00000168405 | CMAHP     | 6.397 | -0.348 | 0.785 | 0.003080282 | 0.016030912 |
| ENSG00000179523 | EIF3J-AS1 | 3.876 | -0.261 | 0.834 | 0.003081218 | 0.016030912 |
| ENSG00000140854 | KATNB1    | 3.655 | 0.245  | 1.185 | 0.003082821 | 0.016031284 |
| ENSG00000154736 | ADAMTS5   | 5.247 | 0.514  | 1.428 | 0.003092526 | 0.016073766 |
| ENSG00000196950 | SLC39A10  | 3.626 | -0.277 | 0.825 | 0.003104537 | 0.016128183 |
| ENSG00000115252 | PDE1A     | 3.293 | -0.809 | 0.571 | 0.003115209 | 0.016175602 |
| ENSG00000081665 | ZNF506    | 3.329 | -0.279 | 0.824 | 0.003132855 | 0.016259159 |
| ENSG00000176463 | SLCO3A1   | 4.048 | 0.292  | 1.224 | 0.003135299 | 0.016263781 |
| ENSG00000133131 | MORC4     | 5.150 | 0.304  | 1.235 | 0.003141476 | 0.016287753 |
| ENSG00000166900 | STX3      | 2.672 | -0.305 | 0.809 | 0.00315387  | 0.016343914 |
| ENSG00000156042 | CFAP70    | 3.326 | -0.648 | 0.638 | 0.003171154 | 0.016418269 |
| ENSG00000172086 | KRCC1     | 5.156 | -0.226 | 0.855 | 0.003171629 | 0.016418269 |
| ENSG00000113296 | THBS4     | 7.842 | -0.840 | 0.559 | 0.003172923 | 0.016418269 |
| ENSG00000083535 | PIBF1     | 3.975 | -0.268 | 0.830 | 0.003176189 | 0.016427048 |
| ENSG00000076043 | REXO2     | 6.166 | 0.215  | 1.161 | 0.003179552 | 0.01643632  |

|                 |         |       |        |       |             |             |
|-----------------|---------|-------|--------|-------|-------------|-------------|
| ENSG00000172716 | SLFN11  | 3.655 | 0.409  | 1.327 | 0.00318742  | 0.01646886  |
| ENSG00000156170 | NDUF6F6 | 2.600 | -0.270 | 0.829 | 0.003194688 | 0.016496312 |
| ENSG00000166260 | COX11   | 4.903 | -0.162 | 0.894 | 0.003195901 | 0.016496312 |
| ENSG00000177700 | POLR2L  | 5.676 | 0.567  | 1.481 | 0.003198006 | 0.016496312 |
| ENSG00000143512 | HHIPL2  | 6.814 | 0.245  | 1.185 | 0.003199036 | 0.016496312 |
| ENSG00000175105 | ZNF654  | 4.242 | -0.272 | 0.828 | 0.003202415 | 0.016497957 |
| ENSG00000106392 | C1GALT1 | 4.560 | 0.412  | 1.330 | 0.003202507 | 0.016497957 |
| ENSG00000138138 | ATAD1   | 5.195 | -0.194 | 0.874 | 0.003204659 | 0.01650092  |
| ENSG00000197780 | TAF13   | 4.472 | 0.254  | 1.193 | 0.003207136 | 0.016505553 |
| ENSG00000122257 | RBBP6   | 5.973 | -0.262 | 0.834 | 0.003216518 | 0.016545705 |
| ENSG00000120458 | MSANTD2 | 3.635 | -0.346 | 0.787 | 0.003222744 | 0.016562049 |
| ENSG00000178741 | COX5A   | 4.753 | 0.396  | 1.316 | 0.003222859 | 0.016562049 |
| ENSG00000259623 |         | 3.674 | -0.218 | 0.860 | 0.003234774 | 0.016615119 |
| ENSG00000260807 |         | 5.572 | -0.407 | 0.754 | 0.003241519 | 0.016641599 |
| ENSG00000145861 | C1QTNF2 | 3.311 | 0.728  | 1.656 | 0.003249527 | 0.016674536 |
| ENSG00000179152 | TCAIM   | 2.930 | 0.257  | 1.195 | 0.003268109 | 0.016761667 |
| ENSG00000214182 | PTMAP5  | 4.238 | 0.235  | 1.177 | 0.003283064 | 0.01682954  |
| ENSG00000058729 | RIOK2   | 4.231 | -0.190 | 0.876 | 0.003284558 | 0.01682954  |
| ENSG00000173267 | SNCG    | 3.249 | -0.520 | 0.697 | 0.003294158 | 0.016870471 |
| ENSG00000119242 | CCDC92  | 4.020 | 0.185  | 1.137 | 0.003297772 | 0.016880721 |
| ENSG00000181523 | SGSH    | 4.763 | -0.214 | 0.862 | 0.00330064  | 0.016887146 |
| ENSG00000077585 | GPR137B | 4.116 | 0.235  | 1.177 | 0.003321738 | 0.016986787 |
| ENSG00000158092 | NCK1    | 4.020 | -0.288 | 0.819 | 0.003326887 | 0.017004813 |
| ENSG00000137460 | FHDC1   | 3.175 | -0.493 | 0.711 | 0.003330619 | 0.017015576 |
| ENSG00000047188 | YTHDC2  | 4.550 | -0.334 | 0.793 | 0.003334955 | 0.01702942  |
| ENSG00000111450 | STX2    | 4.399 | 0.243  | 1.184 | 0.00333721  | 0.017032627 |
| ENSG00000136731 | UGGT1   | 5.946 | 0.260  | 1.197 | 0.00334671  | 0.017072788 |
| ENSG00000117682 | DHDDS   | 4.536 | 0.168  | 1.123 | 0.003352215 | 0.01709254  |
| ENSG00000152382 | TADA1   | 3.053 | -0.289 | 0.818 | 0.003361649 | 0.017132298 |
| ENSG00000100345 | MYH9    | 7.907 | 0.288  | 1.221 | 0.003367015 | 0.017151295 |
| ENSG00000102871 | TRADD   | 4.018 | 0.339  | 1.265 | 0.003370276 | 0.017153369 |
| ENSG00000100201 | DDX17   | 9.055 | -0.339 | 0.791 | 0.003370699 | 0.017153369 |
| ENSG00000151876 | FBXO4   | 3.516 | -0.226 | 0.855 | 0.003379403 | 0.017189303 |
| ENSG00000178053 | MLF1    | 3.650 | 0.282  | 1.216 | 0.003383813 | 0.017203375 |
| ENSG00000173914 | RBM4B   | 3.647 | -0.216 | 0.861 | 0.003393781 | 0.017240538 |
| ENSG00000131171 | SH3BGRL | 6.570 | -0.171 | 0.888 | 0.003394416 | 0.017240538 |
| ENSG00000182473 | EXOC7   | 5.472 | -0.231 | 0.852 | 0.003408679 | 0.017304582 |
| ENSG00000163412 | EIF4E3  | 4.866 | -0.243 | 0.845 | 0.003423778 | 0.017362665 |
| ENSG00000147364 | FBXO25  | 3.441 | 0.271  | 1.206 | 0.003424669 | 0.017362665 |
| ENSG00000177192 | PUS1    | 3.043 | 0.370  | 1.293 | 0.003425182 | 0.017362665 |
| ENSG00000154734 | ADAMTS1 | 5.966 | 0.543  | 1.457 | 0.003426754 | 0.017362665 |
| ENSG00000143570 | SLC39A1 | 6.720 | 0.172  | 1.126 | 0.003456512 | 0.01748556  |
| ENSG00000126062 | TMEM115 | 4.519 | 0.288  | 1.221 | 0.003459525 | 0.01748556  |
| ENSG00000105185 | PDCD5   | 5.047 | 0.308  | 1.238 | 0.003459946 | 0.01748556  |
| ENSG00000224546 | EIF4BP3 | 2.914 | -0.345 | 0.787 | 0.003461018 | 0.01748556  |
| ENSG00000156873 | PHKG2   | 4.118 | 0.357  | 1.281 | 0.003462145 | 0.01748556  |
| ENSG00000245694 | CRNDE   | 3.456 | 0.437  | 1.354 | 0.003462271 | 0.01748556  |
| ENSG00000182154 | MRPL41  | 4.026 | 0.557  | 1.471 | 0.003462702 | 0.01748556  |
| ENSG00000101474 | APMAP   | 5.522 | -0.181 | 0.882 | 0.003471347 | 0.017520761 |
| ENSG00000167842 | MIS12   | 4.188 | -0.195 | 0.873 | 0.003481679 | 0.017564442 |
| ENSG00000173566 |         | 2.883 | 0.486  | 1.401 | 0.003486772 | 0.017581663 |
| ENSG00000102738 | MRPS31  | 3.685 | -0.257 | 0.837 | 0.003489765 | 0.017588282 |



|                 |           |       |        |       |             |             |
|-----------------|-----------|-------|--------|-------|-------------|-------------|
| ENSG00000178252 | WDR6      | 6.342 | -0.323 | 0.799 | 0.003498126 | 0.017621938 |
| ENSG00000130147 | SH3BP4    | 3.522 | -0.277 | 0.825 | 0.003516996 | 0.017708471 |
| ENSG00000172375 | C2CD2L    | 3.187 | 0.255  | 1.193 | 0.003523535 | 0.017732866 |
| ENSG0000019485  | PRDM11    | 2.590 | -0.375 | 0.771 | 0.00353217  | 0.017767781 |
| ENSG00000128928 | IVD       | 5.326 | -0.159 | 0.896 | 0.003534327 | 0.017770095 |
| ENSG00000121057 | AKAP1     | 4.737 | -0.274 | 0.827 | 0.003541507 | 0.017797645 |
| ENSG00000211459 | MT-RNR1   | 9.969 | 0.562  | 1.476 | 0.003555768 | 0.017860738 |
| ENSG00000103121 | CMC2      | 2.651 | 0.426  | 1.343 | 0.003569571 | 0.017917282 |
| ENSG00000136144 | RCBTB1    | 3.802 | -0.276 | 0.826 | 0.003570448 | 0.017917282 |
| ENSG00000113658 | SMAD5     | 5.276 | -0.341 | 0.790 | 0.003575255 | 0.017926291 |
| ENSG00000135974 | C2orf49   | 4.389 | -0.238 | 0.848 | 0.003575668 | 0.017926291 |
| ENSG00000161091 | MFSD12    | 3.657 | 0.337  | 1.263 | 0.003585042 | 0.017964682 |
| ENSG00000146842 | TMEM209   | 4.088 | -0.207 | 0.866 | 0.00358719  | 0.017966846 |
| ENSG00000170004 | CHD3      | 6.776 | 0.173  | 1.127 | 0.003614611 | 0.018095527 |
| ENSG00000101825 | MXRA5     | 8.411 | 0.577  | 1.491 | 0.00362073  | 0.018117497 |
| ENSG00000185043 | CIB1      | 6.101 | 0.405  | 1.324 | 0.003623644 | 0.018122362 |
| ENSG00000128915 | ICE2      | 4.603 | -0.249 | 0.842 | 0.003625165 | 0.018122362 |
| ENSG00000167378 | IRGQ      | 4.191 | 0.269  | 1.205 | 0.003627164 | 0.0181237   |
| ENSG00000113916 | BCL6      | 7.439 | -0.393 | 0.762 | 0.003647794 | 0.018218086 |
| ENSG00000205364 | MT1M      | 5.749 | 0.605  | 1.521 | 0.003665823 | 0.018289111 |
| ENSG00000145685 | LHFPL2    | 5.824 | 0.341  | 1.266 | 0.003666256 | 0.018289111 |
| ENSG00000197217 | ENTPD4    | 5.222 | 0.287  | 1.220 | 0.003667257 | 0.018289111 |
| ENSG00000138942 | RNF185    | 4.483 | -0.159 | 0.896 | 0.003685025 | 0.018368913 |
| ENSG00000095066 | HOOK2     | 5.919 | 0.271  | 1.206 | 0.003686768 | 0.018368913 |
| ENSG00000134759 | ELP2      | 6.013 | -0.173 | 0.887 | 0.003700902 | 0.018430565 |
| ENSG00000136842 | TMOD1     | 3.094 | 0.542  | 1.456 | 0.003708378 | 0.018459012 |
| ENSG00000081154 | PCNP      | 6.960 | -0.185 | 0.879 | 0.003718487 | 0.018500535 |
| ENSG00000153140 | CETN3     | 3.791 | -0.241 | 0.846 | 0.003728291 | 0.018540501 |
| ENSG00000135968 | GCC2      | 5.212 | -0.369 | 0.774 | 0.003732253 | 0.018551387 |
| ENSG00000168067 | MAP4K2    | 3.328 | 0.211  | 1.157 | 0.003742742 | 0.01858991  |
| ENSG00000196458 | ZNF605    | 3.749 | -0.292 | 0.817 | 0.003743555 | 0.01858991  |
| ENSG00000137845 | ADAM10    | 5.140 | 0.226  | 1.169 | 0.003746501 | 0.018595718 |
| ENSG00000137310 | TCF19     | 3.718 | -0.241 | 0.846 | 0.003757704 | 0.018642486 |
| ENSG00000115762 | PLEKHB2   | 4.935 | 0.213  | 1.159 | 0.003761956 | 0.018654742 |
| ENSG00000034713 | GABARAPL2 | 7.432 | 0.220  | 1.165 | 0.003770684 | 0.018689167 |
| ENSG00000100744 | GSKIP     | 3.362 | 0.227  | 1.171 | 0.003781048 | 0.018731666 |
| ENSG00000224594 | RPL29P19  | 3.278 | -0.502 | 0.706 | 0.003784519 | 0.018739995 |
| ENSG00000145494 | NDUFS6    | 4.481 | 0.513  | 1.427 | 0.003826926 | 0.018941024 |
| ENSG00000163815 | CLEC3B    | 5.519 | 0.952  | 1.934 | 0.003851398 | 0.019053134 |
| ENSG00000109689 | STIM2     | 3.439 | -0.199 | 0.871 | 0.003871485 | 0.019143461 |
| ENSG00000256269 | HMBS      | 3.292 | 0.374  | 1.296 | 0.003882461 | 0.019188669 |
| ENSG00000203879 | GDI1      | 6.829 | 0.168  | 1.124 | 0.003887303 | 0.019203532 |
| ENSG00000007202 | KIAA0100  | 5.565 | 0.258  | 1.196 | 0.003899101 | 0.019252729 |
| ENSG00000129038 | LOXL1     | 4.456 | 0.715  | 1.642 | 0.003910145 | 0.019298162 |
| ENSG00000166685 | COG1      | 4.573 | -0.256 | 0.837 | 0.003918416 | 0.019329868 |
| ENSG00000146350 | TBC1D32   | 3.143 | -0.421 | 0.747 | 0.003934028 | 0.019391095 |
| ENSG00000064195 | DLX3      | 3.965 | 0.475  | 1.390 | 0.003934532 | 0.019391095 |
| ENSG00000123552 | USP45     | 2.925 | -0.340 | 0.790 | 0.003956877 | 0.019492044 |
| ENSG00000142694 | EVA1B     | 4.486 | 0.580  | 1.494 | 0.003985754 | 0.019625058 |
| ENSG00000171307 | ZDHHC16   | 4.286 | 0.177  | 1.130 | 0.003991701 | 0.019640039 |
| ENSG00000166348 | USP54     | 3.184 | -0.304 | 0.810 | 0.003992549 | 0.019640039 |
| ENSG00000168994 | PXDC1     | 5.443 | 0.219  | 1.164 | 0.003995554 | 0.019645588 |

|                 |            |        |        |       |             |             |
|-----------------|------------|--------|--------|-------|-------------|-------------|
| ENSG00000156052 | GNAQ       | 5.090  | 0.246  | 1.186 | 0.00400906  | 0.01970274  |
| ENSG00000138078 | PREPL      | 5.239  | -0.264 | 0.833 | 0.004022803 | 0.019761005 |
| ENSG00000076716 | GPC4       | 2.697  | 0.813  | 1.756 | 0.004027951 | 0.019769626 |
| ENSG00000075415 | SLC25A3    | 7.613  | 0.235  | 1.177 | 0.004028335 | 0.019769626 |
| ENSG00000026025 | VIM        | 10.890 | 0.330  | 1.257 | 0.004044581 | 0.019837267 |
| ENSG00000163517 | HDAC11     | 4.098  | -0.296 | 0.814 | 0.004047054 | 0.019837267 |
| ENSG00000118369 | USP35      | 3.648  | 0.246  | 1.186 | 0.004047803 | 0.019837267 |
| ENSG00000177853 | ZNF518A    | 4.354  | -0.436 | 0.739 | 0.00405346  | 0.019855697 |
| ENSG00000040531 | CTNS       | 3.124  | 0.230  | 1.173 | 0.004057055 | 0.01986401  |
| ENSG00000143543 | JTB        | 6.987  | 0.329  | 1.256 | 0.004068645 | 0.019911443 |
| ENSG00000078043 | PIAS2      | 4.085  | -0.229 | 0.853 | 0.004076895 | 0.019942495 |
| ENSG00000094880 | CDC23      | 4.051  | -0.223 | 0.857 | 0.004080315 | 0.019949898 |
| ENSG00000164647 | STEAP1     | 5.416  | 0.299  | 1.230 | 0.00408901  | 0.019983079 |
| ENSG00000180233 | ZNRF2      | 2.702  | -0.279 | 0.824 | 0.004100659 | 0.020030658 |
| ENSG00000115816 | CEBPZ      | 4.002  | -0.504 | 0.705 | 0.004103295 | 0.020034184 |
| ENSG00000066651 | TRMT11     | 3.831  | -0.359 | 0.780 | 0.004117791 | 0.020095589 |
| ENSG00000139746 | RBM26      | 5.675  | -0.212 | 0.863 | 0.004121965 | 0.020106585 |
| ENSG00000099260 | PALMD      | 5.806  | 0.270  | 1.206 | 0.00412639  | 0.020118795 |
| ENSG00000243335 | KCTD7      | 3.673  | -0.326 | 0.797 | 0.004131893 | 0.020136245 |
| ENSG00000107551 | RASSF4     | 3.930  | -0.324 | 0.799 | 0.004137974 | 0.020156499 |
| ENSG00000159388 | BTG2       | 7.092  | -0.440 | 0.737 | 0.00415326  | 0.02021776  |
| ENSG00000121749 | TBC1D15    | 5.354  | -0.178 | 0.884 | 0.004154962 | 0.02021776  |
| ENSG00000253738 | OTUD6B-AS1 | 5.087  | -0.242 | 0.846 | 0.004156345 | 0.02021776  |
| ENSG00000168802 | CHTF8      | 3.161  | 0.302  | 1.233 | 0.004160007 | 0.020226176 |
| ENSG00000057252 | SOAT1      | 4.447  | -0.189 | 0.877 | 0.004174486 | 0.020282716 |
| ENSG00000129245 | FXR2       | 4.623  | 0.160  | 1.118 | 0.004175511 | 0.020282716 |
| ENSG00000215861 |            | 3.677  | -0.330 | 0.795 | 0.004182633 | 0.020304479 |
| ENSG00000109107 | ALDOC      | 5.876  | -0.267 | 0.831 | 0.004183871 | 0.020304479 |
| ENSG00000086062 | B4GALT1    | 5.468  | 0.289  | 1.222 | 0.004232076 | 0.020528905 |
| ENSG00000162882 | HAAO       | 2.885  | -0.406 | 0.755 | 0.004261733 | 0.020663187 |
| ENSG00000145916 | RMND5B     | 4.311  | -0.183 | 0.881 | 0.004267021 | 0.020679248 |
| ENSG00000050426 | LETMD1     | 5.117  | -0.184 | 0.880 | 0.004276443 | 0.020697601 |
| ENSG00000183255 | PTTG1IP    | 8.512  | 0.201  | 1.149 | 0.004276579 | 0.020697601 |
| ENSG00000074935 | TUBE1      | 4.461  | -0.349 | 0.785 | 0.00427674  | 0.020697601 |
| ENSG00000074219 | TEAD2      | 4.242  | -0.260 | 0.835 | 0.004279135 | 0.020699626 |
| ENSG00000250305 | KIAA1456   | 3.714  | -0.328 | 0.797 | 0.004286181 | 0.020724132 |
| ENSG00000131051 | RBM39      | 7.747  | -0.202 | 0.869 | 0.004294242 | 0.020753519 |
| ENSG00000126860 | EVI2A      | 3.946  | 0.504  | 1.418 | 0.004296989 | 0.020757211 |
| ENSG00000178996 | SNX18      | 4.905  | -0.223 | 0.857 | 0.004311677 | 0.020818559 |
| ENSG00000186812 | ZNF397     | 3.649  | -0.400 | 0.758 | 0.004322918 | 0.020853026 |
| ENSG00000183798 | EMILIN3    | 6.756  | -0.547 | 0.684 | 0.004324396 | 0.020853026 |
| ENSG00000119906 | SLF2       | 4.732  | -0.331 | 0.795 | 0.004324792 | 0.020853026 |
| ENSG00000172757 | CFL1       | 7.558  | 0.350  | 1.275 | 0.004328381 | 0.020860724 |
| ENSG00000125812 | GZF1       | 3.706  | -0.261 | 0.834 | 0.004348424 | 0.020947678 |
| ENSG00000184840 | TMED9      | 8.172  | 0.268  | 1.204 | 0.004371146 | 0.021047451 |
| ENSG00000144792 | ZNF660     | 2.816  | -0.331 | 0.795 | 0.004382875 | 0.021094225 |
| ENSG00000092931 | MFSD11     | 4.509  | 0.172  | 1.127 | 0.0043886   | 0.021112072 |
| ENSG00000173193 | PARP14     | 4.603  | -0.317 | 0.803 | 0.004402309 | 0.021168292 |
| ENSG00000168944 | CEP120     | 4.537  | -0.257 | 0.837 | 0.004409182 | 0.021191606 |
| ENSG00000113407 | TARS       | 5.211  | 0.230  | 1.173 | 0.00441636  | 0.021202052 |
| ENSG00000112576 | CCND3      | 5.792  | 0.243  | 1.184 | 0.004417792 | 0.021202052 |
| ENSG00000163191 | S100A11    | 7.032  | 0.409  | 1.328 | 0.004419693 | 0.021202052 |

|                 |          |        |        |       |             |             |
|-----------------|----------|--------|--------|-------|-------------|-------------|
| ENSG00000085662 | AKR1B1   | 5.660  | 0.302  | 1.233 | 0.004420696 | 0.021202052 |
| ENSG00000130558 | OLFM1    | 3.945  | -0.274 | 0.827 | 0.004421482 | 0.021202052 |
| ENSG00000104964 | AES      | 5.992  | -0.259 | 0.836 | 0.00442485  | 0.021208482 |
| ENSG00000146701 | MDH2     | 6.177  | 0.269  | 1.205 | 0.004433702 | 0.021241185 |
| ENSG00000127980 | PEX1     | 4.581  | -0.364 | 0.777 | 0.004457554 | 0.021345689 |
| ENSG00000100568 | VTI1B    | 3.992  | 0.221  | 1.166 | 0.004464771 | 0.021370474 |
| ENSG00000100814 | CCNB1IP1 | 5.353  | -0.280 | 0.823 | 0.004486314 | 0.021463774 |
| ENSG00000106819 | ASPN     | 10.282 | 0.629  | 1.547 | 0.004503088 | 0.021534182 |
| ENSG00000165272 | AQP3     | 5.923  | 0.535  | 1.449 | 0.0045224   | 0.02161666  |
| ENSG00000175318 | GRAMD2   | 3.218  | -0.494 | 0.710 | 0.004525279 | 0.021620548 |
| ENSG00000133678 | TMEM254  | 3.265  | -0.236 | 0.849 | 0.004540617 | 0.021683931 |
| ENSG00000167642 | SPINT2   | 7.097  | -0.305 | 0.810 | 0.004577417 | 0.021849705 |
| ENSG00000167703 | SLC43A2  | 3.000  | -0.658 | 0.634 | 0.004583154 | 0.021867119 |
| ENSG00000198690 | FAN1     | 4.622  | -0.629 | 0.647 | 0.00459907  | 0.021931391 |
| ENSG00000143353 | LYPLAL1  | 3.732  | -0.221 | 0.858 | 0.004600815 | 0.021931391 |
| ENSG00000154845 | PPP4R1   | 5.389  | 0.200  | 1.149 | 0.004609109 | 0.021960927 |
| ENSG00000119487 | MAPKAP1  | 5.542  | 0.179  | 1.132 | 0.004613514 | 0.021971915 |
| ENSG00000106049 | HIBADH   | 4.667  | -0.196 | 0.873 | 0.004632978 | 0.022038966 |
| ENSG00000164405 | UQCRQ    | 4.953  | 0.524  | 1.438 | 0.004635874 | 0.022038966 |
| ENSG00000104047 | DTWD1    | 4.899  | -0.204 | 0.868 | 0.004635914 | 0.022038966 |
| ENSG00000159210 | SNF8     | 4.342  | 0.321  | 1.249 | 0.004636015 | 0.022038966 |
| ENSG00000196236 | XPNPEP3  | 3.651  | -0.233 | 0.851 | 0.004641726 | 0.022056099 |
| ENSG00000056972 | TRAF3IP2 | 5.166  | 0.200  | 1.149 | 0.004648696 | 0.022079196 |
| ENSG00000183779 | ZNF703   | 5.174  | -0.333 | 0.794 | 0.004667106 | 0.022154369 |
| ENSG00000088826 | SMOX     | 4.305  | 0.457  | 1.373 | 0.004668756 | 0.022154369 |
| ENSG00000163322 | FAM175A  | 2.615  | -0.434 | 0.740 | 0.004673567 | 0.022165672 |
| ENSG00000136240 | KDELRL2  | 8.227  | 0.204  | 1.152 | 0.004675373 | 0.022165672 |
| ENSG00000169692 | AGPAT2   | 4.676  | 0.447  | 1.364 | 0.004689231 | 0.022221307 |
| ENSG00000136381 | IREB2    | 4.991  | -0.302 | 0.811 | 0.004698963 | 0.022257351 |
| ENSG00000121931 | LRIF1    | 3.584  | -0.313 | 0.805 | 0.00470662  | 0.022278705 |
| ENSG00000162889 | MAPKAPK2 | 6.101  | 0.187  | 1.139 | 0.004708449 | 0.022278705 |
| ENSG00000139266 | MARCH9   | 3.812  | 0.327  | 1.254 | 0.004709856 | 0.022278705 |
| ENSG00000197016 | ZNF470   | 3.211  | -0.288 | 0.819 | 0.00471523  | 0.02229405  |
| ENSG00000164180 | TMEM161B | 3.729  | -0.332 | 0.795 | 0.004717766 | 0.022295968 |
| ENSG00000078399 | HOXA9    | 3.147  | -0.264 | 0.833 | 0.004721376 | 0.022302961 |
| ENSG00000125037 | EMC3     | 5.217  | 0.259  | 1.196 | 0.004743028 | 0.022395136 |
| ENSG00000198453 | ZNF568   | 3.239  | -0.216 | 0.861 | 0.004746527 | 0.022401555 |
| ENSG00000149499 | EML3     | 5.991  | -0.226 | 0.855 | 0.004753182 | 0.022417807 |
| ENSG00000172009 | THOP1    | 4.400  | 0.242  | 1.182 | 0.004754254 | 0.022417807 |
| ENSG00000149600 | COMMD7   | 4.048  | 0.343  | 1.268 | 0.004767573 | 0.022470487 |
| ENSG00000008130 | NADK     | 5.197  | 0.184  | 1.136 | 0.004778329 | 0.022511049 |
| ENSG00000148700 | ADD3     | 4.720  | 0.279  | 1.213 | 0.004794194 | 0.022575631 |
| ENSG00000146122 | DAAM2    | 5.923  | -0.694 | 0.618 | 0.004809328 | 0.022636712 |
| ENSG00000173511 | VEGFB    | 5.691  | 0.420  | 1.338 | 0.004826829 | 0.022708875 |
| ENSG00000166949 | SMAD3    | 6.426  | -0.313 | 0.805 | 0.004831916 | 0.022722597 |
| ENSG00000166833 | NAV2     | 4.514  | 0.347  | 1.272 | 0.00483808  | 0.022741368 |
| ENSG00000027847 | B4GALT7  | 5.250  | 0.258  | 1.196 | 0.004851531 | 0.022794355 |
| ENSG00000111412 | C12orf49 | 2.787  | 0.259  | 1.196 | 0.004857432 | 0.022810934 |
| ENSG00000132017 | DCAF15   | 4.045  | 0.191  | 1.141 | 0.004859418 | 0.022810934 |
| ENSG00000136897 | MRPL50   | 4.006  | -0.184 | 0.880 | 0.004863349 | 0.022819157 |
| ENSG00000124608 | AARS2    | 3.527  | -0.194 | 0.874 | 0.004866195 | 0.022822282 |
| ENSG00000151233 | GXYLT1   | 3.430  | -0.255 | 0.838 | 0.004885485 | 0.022902489 |

|                 |           |       |        |       |             |             |
|-----------------|-----------|-------|--------|-------|-------------|-------------|
| ENSG00000143369 | ECM1      | 6.598 | 0.546  | 1.460 | 0.004890528 | 0.022915867 |
| ENSG00000248180 | GAPDHP60  | 2.670 | 0.321  | 1.249 | 0.00491252  | 0.023008619 |
| ENSG00000183808 | RBM12B    | 3.153 | -0.375 | 0.771 | 0.004915945 | 0.02301436  |
| ENSG00000198081 | ZBTB14    | 3.822 | -0.217 | 0.860 | 0.004925608 | 0.023049293 |
| ENSG00000107882 | SUFU      | 3.586 | -0.218 | 0.860 | 0.004932701 | 0.02307217  |
| ENSG00000108797 | CNTNAP1   | 4.018 | -0.349 | 0.785 | 0.00494119  | 0.023101555 |
| ENSG00000196961 | AP2A1     | 5.725 | 0.208  | 1.155 | 0.005014378 | 0.023433265 |
| ENSG00000204599 | TRIM39    | 4.008 | -0.181 | 0.882 | 0.005023459 | 0.023465227 |
| ENSG00000204054 | LINC00963 | 6.242 | -0.201 | 0.870 | 0.005027259 | 0.0234725   |
| ENSG00000130695 | CEP85     | 3.961 | -0.364 | 0.777 | 0.005043875 | 0.023539584 |
| ENSG00000062194 | GPBP1     | 6.061 | -0.143 | 0.906 | 0.005050976 | 0.023562216 |
| ENSG00000163660 | CCNL1     | 7.748 | -0.367 | 0.775 | 0.005059773 | 0.023592741 |
| ENSG00000187479 | C11orf96  | 4.806 | 0.599  | 1.515 | 0.005064478 | 0.023604167 |
| ENSG00000113048 | MRPS27    | 5.336 | -0.186 | 0.879 | 0.00507023  | 0.023620457 |
| ENSG00000228223 | HCG11     | 4.642 | -0.362 | 0.778 | 0.005080674 | 0.023658583 |
| ENSG00000102034 | ELF4      | 3.427 | 0.304  | 1.235 | 0.005087789 | 0.023681182 |
| ENSG00000112559 | MDFI      | 6.828 | -0.356 | 0.781 | 0.005091049 | 0.023685822 |
| ENSG00000108518 | PFN1      | 6.626 | 0.410  | 1.329 | 0.005100284 | 0.023718244 |
| ENSG00000184702 | SEPT5     | 5.970 | -0.229 | 0.853 | 0.005126563 | 0.023829867 |
| ENSG00000181754 | AMIGO1    | 2.613 | -0.324 | 0.799 | 0.005155372 | 0.023947348 |
| ENSG00000223547 | ZNF844    | 3.834 | -0.247 | 0.842 | 0.005156412 | 0.023947348 |
| ENSG00000120327 | PCDHB14   | 3.521 | -0.249 | 0.841 | 0.005160599 | 0.023954028 |
| ENSG00000166925 | TSC22D4   | 5.481 | -0.295 | 0.815 | 0.005162427 | 0.023954028 |
| ENSG00000166337 | TAF10     | 4.524 | 0.311  | 1.241 | 0.005177721 | 0.024014349 |
| ENSG00000049089 | COL9A2    | 9.680 | -0.607 | 0.657 | 0.005190471 | 0.024053539 |
| ENSG00000117298 | ECE1      | 5.345 | 0.312  | 1.242 | 0.005190767 | 0.024053539 |
| ENSG00000007384 | RHBDF1    | 4.986 | 0.220  | 1.165 | 0.00519502  | 0.024062596 |
| ENSG00000124767 | GLO1      | 5.923 | -0.148 | 0.903 | 0.005200072 | 0.024075344 |
| ENSG00000165512 | ZNF22     | 3.810 | -0.244 | 0.844 | 0.005205247 | 0.024088651 |
| ENSG00000129932 | DOHH      | 2.764 | 0.357  | 1.281 | 0.00521291  | 0.024113452 |
| ENSG00000111652 | COPS7A    | 6.121 | 0.144  | 1.105 | 0.005226938 | 0.024167662 |
| ENSG00000009694 | TENM1     | 3.436 | -0.491 | 0.712 | 0.005231382 | 0.024177531 |
| ENSG00000164032 | H2AFZ     | 5.870 | 0.312  | 1.241 | 0.005235574 | 0.024186224 |
| ENSG00000108175 | ZMIZ1     | 7.510 | -0.363 | 0.777 | 0.005256694 | 0.024273081 |
| ENSG00000111231 | GPN3      | 3.889 | -0.185 | 0.880 | 0.005261061 | 0.024282533 |
| ENSG00000179409 | GEMIN4    | 4.163 | -0.195 | 0.874 | 0.005293659 | 0.024411826 |
| ENSG00000187239 | FNBP1     | 3.807 | -0.232 | 0.851 | 0.005293738 | 0.024411826 |
| ENSG00000185920 | PTCH1     | 4.802 | -0.502 | 0.706 | 0.005301857 | 0.024438503 |
| ENSG00000110955 | ATP5B     | 7.776 | 0.183  | 1.135 | 0.005319175 | 0.024507538 |
| ENSG00000123989 | CHPF      | 8.393 | 0.305  | 1.235 | 0.005323933 | 0.02451043  |
| ENSG00000103187 | COTL1     | 5.186 | 0.459  | 1.375 | 0.005324486 | 0.02451043  |
| ENSG00000116005 | PCYOX1    | 7.131 | -0.270 | 0.829 | 0.005341196 | 0.024573865 |
| ENSG00000156017 | CARNMT1   | 3.232 | -0.269 | 0.830 | 0.005343186 | 0.024573865 |
| ENSG00000196756 | SNHG17    | 3.583 | 0.324  | 1.252 | 0.005347711 | 0.024573865 |
| ENSG00000073578 | SDHA      | 5.655 | 0.223  | 1.167 | 0.005348396 | 0.024573865 |
| ENSG00000043143 | JADE2     | 5.691 | -0.244 | 0.844 | 0.005351733 | 0.024573865 |
| ENSG00000143554 | SLC27A3   | 4.230 | 0.344  | 1.270 | 0.005352351 | 0.024573865 |
| ENSG00000111261 | MANSC1    | 4.542 | -0.250 | 0.841 | 0.005371999 | 0.02465326  |
| ENSG00000153391 | INO80C    | 3.159 | 0.379  | 1.300 | 0.005382056 | 0.024688589 |
| ENSG00000062485 | CS        | 5.288 | 0.157  | 1.115 | 0.005403837 | 0.024777647 |
| ENSG00000197181 | PIWIL2    | 2.618 | -0.445 | 0.734 | 0.005439649 | 0.024923907 |
| ENSG00000132383 | RPA1      | 6.051 | -0.166 | 0.892 | 0.005440498 | 0.024923907 |

|                 |          |        |        |       |             |             |
|-----------------|----------|--------|--------|-------|-------------|-------------|
| ENSG00000124209 | RAB22A   | 4.922  | 0.214  | 1.160 | 0.005453561 | 0.024972825 |
| ENSG00000100304 | TLL12    | 3.872  | 0.235  | 1.177 | 0.005458956 | 0.024986597 |
| ENSG00000148672 | GLUD1    | 6.083  | 0.200  | 1.148 | 0.005487041 | 0.025095692 |
| ENSG00000105058 | FAM32A   | 5.345  | 0.235  | 1.177 | 0.005487585 | 0.025095692 |
| ENSG00000126945 | HNRNPH2  | 5.901  | -0.145 | 0.904 | 0.005491911 | 0.025104507 |
| ENSG00000107719 | PALD1    | 4.906  | -0.394 | 0.761 | 0.005507611 | 0.025165289 |
| ENSG00000188070 | C11orf95 | 5.325  | -0.220 | 0.858 | 0.005517545 | 0.02519968  |
| ENSG00000215012 | C22orf29 | 3.408  | -0.242 | 0.845 | 0.005546564 | 0.025321164 |
| ENSG00000073910 | FRY      | 6.552  | -0.429 | 0.743 | 0.005553597 | 0.025342221 |
| ENSG00000006015 | C19orf60 | 4.798  | 0.433  | 1.350 | 0.005575861 | 0.025432727 |
| ENSG00000177565 | TBL1XR1  | 6.737  | -0.215 | 0.862 | 0.005584866 | 0.02546271  |
| ENSG00000166557 | TMED3    | 6.872  | 0.351  | 1.276 | 0.005592015 | 0.025484203 |
| ENSG00000119682 | AREL1    | 3.639  | 0.288  | 1.221 | 0.005604447 | 0.025529742 |
| ENSG00000068001 | HYAL2    | 4.471  | 0.339  | 1.265 | 0.005611504 | 0.025550773 |
| ENSG00000119711 | ALDH6A1  | 4.430  | -0.271 | 0.829 | 0.005643945 | 0.025687312 |
| ENSG00000173171 | MTX1     | 2.981  | 0.270  | 1.206 | 0.005655795 | 0.025721818 |
| ENSG00000228474 | OST4     | 5.996  | 0.313  | 1.243 | 0.005656571 | 0.025721818 |
| ENSG00000234518 | PTGES3P1 | 3.820  | -0.405 | 0.755 | 0.005661218 | 0.025721818 |
| ENSG00000198937 | CCDC167  | 2.877  | 0.508  | 1.423 | 0.005661355 | 0.025721818 |
| ENSG00000132300 | PTCD3    | 5.111  | -0.155 | 0.898 | 0.005675439 | 0.025774617 |
| ENSG00000164050 | PLXNB1   | 6.339  | -0.276 | 0.826 | 0.005688666 | 0.025823483 |
| ENSG00000164125 | FAM198B  | 4.535  | -0.364 | 0.777 | 0.005707162 | 0.025896217 |
| ENSG00000171150 | SOCS5    | 4.800  | -0.244 | 0.844 | 0.00571078  | 0.025901405 |
| ENSG00000143815 | LBR      | 3.088  | -0.220 | 0.859 | 0.005718785 | 0.025926478 |
| ENSG00000187231 | SESTD1   | 6.021  | -0.329 | 0.796 | 0.005730958 | 0.02597042  |
| ENSG00000136859 | ANGPTL2  | 11.215 | 0.335  | 1.261 | 0.005736649 | 0.025984958 |
| ENSG00000039123 | SKIV2L2  | 4.888  | -0.254 | 0.839 | 0.005748322 | 0.026026573 |
| ENSG00000137834 | SMAD6    | 4.573  | 0.237  | 1.179 | 0.005751383 | 0.026027351 |
| ENSG00000101109 | STK4     | 4.310  | -0.338 | 0.791 | 0.005753467 | 0.026027351 |
| ENSG00000178952 | TUFM     | 6.151  | 0.267  | 1.203 | 0.005763253 | 0.026060358 |
| ENSG00000008405 | CRY1     | 5.217  | 0.284  | 1.218 | 0.005770522 | 0.026081963 |
| ENSG00000163930 | BAP1     | 5.783  | 0.132  | 1.096 | 0.00577877  | 0.026098552 |
| ENSG00000164306 | PRIMPOL  | 3.188  | -0.278 | 0.825 | 0.005779179 | 0.026098552 |
| ENSG00000183386 | FHL3     | 3.432  | 0.446  | 1.363 | 0.005790746 | 0.026135316 |
| ENSG00000002933 | TMEM176A | 3.134  | -1.069 | 0.477 | 0.005794536 | 0.026135316 |
| ENSG00000264514 |          | 2.774  | -0.584 | 0.667 | 0.00579481  | 0.026135316 |
| ENSG00000168542 | COL3A1   | 14.194 | 0.640  | 1.558 | 0.005807952 | 0.026183308 |
| ENSG00000161542 | PRPSAP1  | 5.054  | -0.244 | 0.844 | 0.005823411 | 0.026230268 |
| ENSG00000134352 | IL6ST    | 7.710  | -0.303 | 0.811 | 0.005825496 | 0.026230268 |
| ENSG00000159720 | ATP6V0D1 | 4.824  | 0.331  | 1.258 | 0.005825886 | 0.026230268 |
| ENSG00000164663 | USP49    | 2.702  | -0.426 | 0.745 | 0.00583297  | 0.026250872 |
| ENSG00000174307 | PHLDA3   | 5.249  | 0.444  | 1.360 | 0.005838599 | 0.026264912 |
| ENSG00000082153 | BZW1     | 7.677  | 0.271  | 1.207 | 0.005849976 | 0.026304791 |
| ENSG00000126790 | L3HYPDH  | 3.030  | -0.239 | 0.847 | 0.005856401 | 0.026322371 |
| ENSG00000148362 | C9orf142 | 3.887  | 0.532  | 1.446 | 0.005876726 | 0.02640239  |
| ENSG00000160685 | ZBTB7B   | 4.575  | 0.234  | 1.176 | 0.005883973 | 0.02642361  |
| ENSG00000163466 | ARPC2    | 7.371  | 0.201  | 1.149 | 0.005910827 | 0.02653282  |
| ENSG00000103043 | VAC14    | 3.818  | 0.253  | 1.192 | 0.005913515 | 0.026533506 |
| ENSG00000166886 | NAB2     | 4.820  | 0.211  | 1.157 | 0.005920203 | 0.026552137 |
| ENSG00000101350 | KIF3B    | 5.584  | 0.207  | 1.155 | 0.005926681 | 0.026569804 |
| ENSG00000127804 | METTL16  | 5.122  | -0.204 | 0.868 | 0.005936793 | 0.026603747 |
| ENSG00000242861 |          | 2.787  | -0.403 | 0.756 | 0.005967772 | 0.026731122 |

|                 |          |        |        |       |             |             |
|-----------------|----------|--------|--------|-------|-------------|-------------|
| ENSG00000213625 | LEPROT   | 6.848  | -0.179 | 0.883 | 0.005979058 | 0.026770224 |
| ENSG00000100532 | CGRRF1   | 3.998  | 0.212  | 1.158 | 0.005992919 | 0.026819533 |
| ENSG00000160161 | CILP2    | 10.515 | 0.444  | 1.361 | 0.005995196 | 0.026819533 |
| ENSG00000119681 | LTBP2    | 9.050  | 0.452  | 1.368 | 0.00603013  | 0.026959609 |
| ENSG00000091592 | NLRP1    | 6.600  | -0.220 | 0.858 | 0.00603311  | 0.026959609 |
| ENSG00000198945 | L3MBTL3  | 2.853  | -0.323 | 0.799 | 0.006036928 | 0.026959609 |
| ENSG00000172590 | MRPL52   | 4.242  | 0.431  | 1.348 | 0.006037986 | 0.026959609 |
| ENSG00000141551 | CSNK1D   | 5.967  | 0.156  | 1.115 | 0.006039385 | 0.026959609 |
| ENSG00000134153 | EMC7     | 6.009  | 0.237  | 1.179 | 0.006060921 | 0.02704421  |
| ENSG00000073111 | MCM2     | 2.899  | 0.218  | 1.163 | 0.006068023 | 0.027064365 |
| ENSG00000064545 | TMEM161A | 4.142  | 0.272  | 1.208 | 0.006076555 | 0.027090875 |
| ENSG00000113369 | ARRDC3   | 6.466  | -0.328 | 0.796 | 0.006084083 | 0.027112892 |
| ENSG00000237765 | FAM200B  | 4.212  | -0.195 | 0.874 | 0.0061005   | 0.027171617 |
| ENSG00000149925 | ALDOA    | 9.620  | 0.266  | 1.202 | 0.006102452 | 0.027171617 |
| ENSG00000148468 | FAM171A1 | 2.891  | -0.319 | 0.802 | 0.006106117 | 0.027176375 |
| ENSG00000186395 | KRT10    | 5.044  | 0.318  | 1.247 | 0.006112671 | 0.027190083 |
| ENSG00000170836 | PPM1D    | 2.965  | -0.238 | 0.848 | 0.006114392 | 0.027190083 |
| ENSG00000115392 | FANCL    | 3.315  | -0.272 | 0.828 | 0.006120798 | 0.027207013 |
| ENSG00000166509 | CLEC3A   | 10.099 | -0.638 | 0.643 | 0.006138222 | 0.02727288  |
| ENSG00000187325 | TAF9B    | 4.620  | -0.313 | 0.805 | 0.006152531 | 0.027324861 |
| ENSG00000164924 | YWHAZ    | 7.798  | 0.169  | 1.125 | 0.006160275 | 0.027347649 |
| ENSG00000144935 | TRPC1    | 4.981  | -0.288 | 0.819 | 0.006175918 | 0.027405474 |
| ENSG00000125652 | ALKBH7   | 4.617  | 0.461  | 1.376 | 0.006208895 | 0.027540131 |
| ENSG00000173137 | ADCK5    | 2.647  | 0.379  | 1.300 | 0.006214675 | 0.027554095 |
| ENSG00000165802 | NSMF     | 4.407  | 0.290  | 1.223 | 0.006242523 | 0.027649295 |
| ENSG00000063854 | HAGH     | 4.195  | 0.298  | 1.229 | 0.0062447   | 0.027649295 |
| ENSG00000167460 | TPM4     | 7.689  | 0.338  | 1.264 | 0.006245031 | 0.027649295 |
| ENSG00000141750 | STAC2    | 4.110  | -0.619 | 0.651 | 0.006246712 | 0.027649295 |
| ENSG00000204116 | CHIC1    | 3.480  | -0.268 | 0.831 | 0.006258318 | 0.027688958 |
| ENSG00000105976 | MET      | 4.205  | 0.396  | 1.316 | 0.00627778  | 0.027763328 |
| ENSG00000173726 | TOMM20   | 7.356  | -0.171 | 0.888 | 0.006295096 | 0.027828153 |
| ENSG00000196678 | ERI2     | 2.706  | -0.416 | 0.749 | 0.006298081 | 0.027829594 |
| ENSG00000219545 | UMAD1    | 4.084  | -0.241 | 0.846 | 0.006317847 | 0.027903488 |
| ENSG00000026508 | CD44     | 7.734  | 0.226  | 1.170 | 0.006323892 | 0.027903488 |
| ENSG00000164953 | TMEM67   | 3.841  | -0.248 | 0.842 | 0.006325054 | 0.027903488 |
| ENSG00000092199 | HNRNPC   | 7.667  | -0.163 | 0.893 | 0.006328303 | 0.027903488 |
| ENSG00000165424 | ZCCHC24  | 5.370  | -0.241 | 0.846 | 0.006330512 | 0.027903488 |
| ENSG00000123933 | MXD4     | 6.432  | -0.263 | 0.833 | 0.006330797 | 0.027903488 |
| ENSG00000100399 | CHADL    | 5.313  | -0.473 | 0.721 | 0.006349919 | 0.02797466  |
| ENSG00000185946 | RNPC3    | 3.396  | -0.703 | 0.614 | 0.00635229  | 0.02797466  |
| ENSG00000196502 | SULT1A1  | 3.014  | -0.366 | 0.776 | 0.006363267 | 0.02801122  |
| ENSG00000130775 | THEMIS2  | 3.153  | 0.833  | 1.781 | 0.006399567 | 0.02815917  |
| ENSG00000134255 | CEPT1    | 3.976  | -0.502 | 0.706 | 0.006409418 | 0.028190665 |
| ENSG00000094975 | SUCO     | 5.434  | -0.280 | 0.824 | 0.006420479 | 0.028227457 |
| ENSG00000105186 | ANKRD27  | 4.145  | 0.225  | 1.169 | 0.006457903 | 0.02838007  |
| ENSG00000101751 | POLI     | 5.020  | -0.279 | 0.824 | 0.00646723  | 0.028409132 |
| ENSG00000156976 | EIF4A2   | 8.359  | -0.209 | 0.865 | 0.006471181 | 0.028414563 |
| ENSG00000143198 | MGST3    | 6.063  | 0.345  | 1.270 | 0.006474122 | 0.028415557 |
| ENSG00000165322 | ARHGAP12 | 4.442  | -0.245 | 0.844 | 0.006494327 | 0.028479789 |
| ENSG00000108107 | RPL28    | 8.549  | 0.475  | 1.390 | 0.006496624 | 0.028479789 |
| ENSG00000086712 | TXLNG    | 3.758  | -0.364 | 0.777 | 0.006502004 | 0.028479789 |
| ENSG00000185115 | NSMCE3   | 4.106  | -0.198 | 0.872 | 0.006502072 | 0.028479789 |

|                 |              |       |        |       |             |             |
|-----------------|--------------|-------|--------|-------|-------------|-------------|
| ENSG00000196776 | CD47         | 6.651 | -0.169 | 0.889 | 0.006502359 | 0.028479789 |
| ENSG00000198168 | SVIP         | 3.780 | -0.212 | 0.863 | 0.006509856 | 0.028500702 |
| ENSG00000137996 | RTCA         | 4.373 | 0.163  | 1.120 | 0.006517044 | 0.028520241 |
| ENSG00000078369 | GNB1         | 7.735 | 0.162  | 1.119 | 0.006521238 | 0.028526671 |
| ENSG00000160271 | RALGDS       | 5.492 | -0.268 | 0.831 | 0.006532223 | 0.028562784 |
| ENSG00000157045 | NTAN1        | 5.011 | 0.287  | 1.220 | 0.00654566  | 0.028609591 |
| ENSG00000079974 | RABL2B       | 3.750 | -0.213 | 0.863 | 0.006557107 | 0.028647661 |
| ENSG00000014123 | UFL1         | 5.510 | -0.290 | 0.818 | 0.006568279 | 0.028681475 |
| ENSG00000118689 | FOXO3        | 6.381 | -0.231 | 0.852 | 0.006570326 | 0.028681475 |
| ENSG00000126870 | WDR60        | 4.584 | -0.237 | 0.848 | 0.006592036 | 0.028758535 |
| ENSG00000068745 | IP6K2        | 5.273 | 0.190  | 1.141 | 0.006593474 | 0.028758535 |
| ENSG00000105877 | DNAH11       | 4.288 | -0.754 | 0.593 | 0.006605129 | 0.028797373 |
| ENSG00000114120 | SLC25A36     | 6.924 | -0.322 | 0.800 | 0.0066263   | 0.028877647 |
| ENSG00000180992 | MRPL14       | 4.343 | 0.474  | 1.389 | 0.006629483 | 0.028879495 |
| ENSG00000132432 | SEC61G       | 6.339 | 0.393  | 1.313 | 0.006639712 | 0.028912023 |
| ENSG00000131844 | MCCC2        | 4.897 | -0.248 | 0.842 | 0.006676636 | 0.029060135 |
| ENSG00000139433 | GLTP         | 5.872 | 0.198  | 1.147 | 0.006681018 | 0.029060135 |
| ENSG00000095574 | IKZF5        | 4.310 | -0.264 | 0.833 | 0.006682054 | 0.029060135 |
| ENSG00000173156 | RHOD         | 4.023 | 0.303  | 1.233 | 0.006688191 | 0.029074742 |
| ENSG00000174796 | THAP6        | 3.421 | -0.329 | 0.796 | 0.006699704 | 0.029112704 |
| ENSG00000205758 | CRYZL1       | 4.243 | -0.163 | 0.893 | 0.006710385 | 0.029147017 |
| ENSG00000163902 | RPN1         | 7.578 | 0.204  | 1.152 | 0.006718749 | 0.029169308 |
| ENSG00000106948 | AKNA         | 3.397 | -0.228 | 0.854 | 0.006722246 | 0.029169308 |
| ENSG00000211460 | TSN          | 5.932 | -0.135 | 0.910 | 0.006723877 | 0.029169308 |
| ENSG00000148335 | NTMT1        | 4.511 | 0.300  | 1.231 | 0.006734405 | 0.029202879 |
| ENSG00000134684 | YARS         | 5.462 | 0.211  | 1.157 | 0.006741917 | 0.029223349 |
| ENSG00000132323 | ILKAP        | 4.365 | 0.264  | 1.201 | 0.006751002 | 0.029250615 |
| ENSG00000149582 | TMEM25       | 4.804 | -0.155 | 0.898 | 0.006764538 | 0.029297137 |
| ENSG00000134986 | NREP         | 4.786 | -0.356 | 0.781 | 0.00677355  | 0.029312463 |
| ENSG00000166073 | GPR176       | 2.729 | 0.582  | 1.497 | 0.006773677 | 0.029312463 |
| ENSG00000198924 | DCLRE1A      | 2.670 | -0.306 | 0.809 | 0.006779081 | 0.029313917 |
| ENSG00000172059 | KLF11        | 2.891 | -0.410 | 0.753 | 0.006779613 | 0.029313917 |
| ENSG00000077147 | TM9SF3       | 7.595 | -0.180 | 0.883 | 0.006794277 | 0.029365193 |
| ENSG00000186104 | CYP2R1       | 3.482 | -0.209 | 0.865 | 0.006797564 | 0.02936727  |
| ENSG00000138036 | DYNC2LI1     | 5.078 | -0.176 | 0.885 | 0.006806374 | 0.029393201 |
| ENSG00000100227 | POLDIP3      | 6.287 | -0.154 | 0.899 | 0.006819135 | 0.029436167 |
| ENSG00000047932 | GOPC         | 5.783 | -0.256 | 0.837 | 0.006823161 | 0.029437348 |
| ENSG00000100299 | ARSA         | 5.354 | 0.264  | 1.201 | 0.006825033 | 0.029437348 |
| ENSG00000160293 | VAV2         | 3.998 | -0.529 | 0.693 | 0.006850138 | 0.029533461 |
| ENSG00000151917 | BEND6        | 3.577 | 0.320  | 1.248 | 0.006900194 | 0.029730932 |
| ENSG00000146828 | SLC12A9      | 4.794 | 0.199  | 1.148 | 0.006901621 | 0.029730932 |
| ENSG00000136213 | CHST12       | 4.662 | 0.228  | 1.172 | 0.006926266 | 0.029824827 |
| ENSG00000136877 | FPGS         | 5.275 | 0.247  | 1.187 | 0.006935532 | 0.029852444 |
| ENSG00000161203 | AP2M1        | 7.805 | 0.192  | 1.142 | 0.006941924 | 0.029867678 |
| ENSG00000132970 | WASF3        | 4.079 | -0.334 | 0.793 | 0.006952764 | 0.029902028 |
| ENSG00000106244 | PDAP1        | 6.377 | 0.223  | 1.167 | 0.006971846 | 0.029970642 |
| ENSG00000104332 | SFRP1        | 3.481 | -1.209 | 0.432 | 0.006977484 | 0.029970642 |
| ENSG00000129521 | EGLN3        | 5.864 | 0.501  | 1.415 | 0.006977567 | 0.029970642 |
| ENSG00000198718 | TOGARAM1     | 4.063 | -0.306 | 0.809 | 0.00698017  | 0.029970642 |
| ENSG00000132613 | MTSS1L       | 3.555 | -0.322 | 0.800 | 0.006987893 | 0.029991498 |
| ENSG00000247828 | TMEM161B-AS1 | 2.682 | -0.327 | 0.797 | 0.006992608 | 0.029995598 |
| ENSG00000197713 | RPE          | 4.073 | -0.194 | 0.874 | 0.006994579 | 0.029995598 |

|                 |           |       |        |       |             |             |
|-----------------|-----------|-------|--------|-------|-------------|-------------|
| ENSG00000155893 | PXYLP1    | 7.221 | 0.263  | 1.200 | 0.00700126  | 0.030011953 |
| ENSG00000104889 | RNASEH2A  | 2.736 | 0.377  | 1.299 | 0.007006017 | 0.030014772 |
| ENSG00000162927 | PUS10     | 3.003 | -0.263 | 0.834 | 0.007007652 | 0.030014772 |
| ENSG00000167671 | UBXN6     | 6.688 | 0.268  | 1.204 | 0.007010765 | 0.030015823 |
| ENSG00000182087 | TMEM259   | 6.547 | 0.160  | 1.117 | 0.007064158 | 0.030211563 |
| ENSG00000176101 | SSNA1     | 4.454 | 0.415  | 1.333 | 0.007065112 | 0.030211563 |
| ENSG00000143178 | TBX19     | 2.915 | -0.291 | 0.818 | 0.007065142 | 0.030211563 |
| ENSG00000050405 | LIMA1     | 6.233 | -0.352 | 0.784 | 0.007096163 | 0.030328001 |
| ENSG00000109917 | ZPR1      | 4.342 | 0.180  | 1.133 | 0.007098166 | 0.030328001 |
| ENSG00000172270 | BSG       | 8.233 | 0.258  | 1.196 | 0.007105734 | 0.030347951 |
| ENSG00000254126 | CD8BP     | 3.934 | 0.400  | 1.319 | 0.007116122 | 0.030379921 |
| ENSG00000168393 | DTYMK     | 3.683 | 0.303  | 1.234 | 0.00712677  | 0.030412977 |
| ENSG00000212694 | LINC01089 | 3.974 | -0.365 | 0.776 | 0.00713161  | 0.030421226 |
| ENSG00000245060 | LINC00847 | 3.976 | -0.205 | 0.867 | 0.007151041 | 0.030491691 |
| ENSG00000015171 | ZMYND11   | 5.827 | -0.244 | 0.844 | 0.007174733 | 0.030580253 |
| ENSG00000010704 | HFE       | 4.194 | -0.218 | 0.860 | 0.007188943 | 0.030628351 |
| ENSG00000099814 | CEP170B   | 4.741 | 0.224  | 1.168 | 0.00719664  | 0.03064867  |
| ENSG00000106617 | PRKAG2    | 3.923 | -0.270 | 0.829 | 0.007200319 | 0.030651868 |
| ENSG00000111371 | SLC38A1   | 5.562 | -0.356 | 0.781 | 0.007220022 | 0.030723248 |
| ENSG00000167384 | ZNF180    | 2.773 | -0.283 | 0.822 | 0.007243871 | 0.030812206 |
| ENSG00000143612 | C1orf43   | 6.928 | 0.153  | 1.112 | 0.00725006  | 0.030826006 |
| ENSG00000182512 | GLRX5     | 3.843 | 0.294  | 1.226 | 0.00726221  | 0.030865129 |
| ENSG00000124541 | RRP36     | 4.701 | 0.250  | 1.189 | 0.007267275 | 0.030874122 |
| ENSG00000147394 | ZNF185    | 3.414 | -0.245 | 0.844 | 0.007278881 | 0.030910884 |
| ENSG00000008311 | AASS      | 3.739 | -0.545 | 0.685 | 0.007291465 | 0.030951768 |
| ENSG00000108179 | PPIF      | 4.470 | -0.263 | 0.833 | 0.00730282  | 0.030987403 |
| ENSG00000114054 | PCCB      | 3.129 | 0.266  | 1.203 | 0.007379562 | 0.031300345 |
| ENSG00000104522 | TSTA3     | 4.825 | 0.290  | 1.223 | 0.007402373 | 0.031378752 |
| ENSG00000103653 | CSK       | 4.609 | 0.196  | 1.145 | 0.007404043 | 0.031378752 |
| ENSG00000126602 | TRAP1     | 3.937 | -0.304 | 0.810 | 0.007408773 | 0.031386093 |
| ENSG00000035928 | RFC1      | 5.266 | -0.207 | 0.867 | 0.007435857 | 0.031488086 |
| ENSG00000025039 | RRAGD     | 3.513 | -0.228 | 0.854 | 0.007468677 | 0.031614278 |
| ENSG00000158716 | DUSP23    | 3.240 | 0.487  | 1.401 | 0.007475612 | 0.031630844 |
| ENSG00000175040 | CHST2     | 4.125 | 0.528  | 1.442 | 0.007501149 | 0.031726074 |
| ENSG00000186111 | PIP5K1C   | 5.307 | 0.184  | 1.136 | 0.007508339 | 0.031743655 |
| ENSG00000065491 | TBC1D22B  | 2.803 | 0.252  | 1.191 | 0.007524076 | 0.031797346 |
| ENSG00000072786 | STK10     | 3.959 | 0.271  | 1.206 | 0.007530851 | 0.031813133 |
| ENSG00000162694 | EXTL2     | 4.890 | 0.190  | 1.141 | 0.007535796 | 0.031821185 |
| ENSG00000105755 | ETHE1     | 2.634 | 0.463  | 1.378 | 0.007557474 | 0.031899854 |
| ENSG00000176974 | SHMT1     | 3.962 | -0.250 | 0.841 | 0.00761762  | 0.032140769 |
| ENSG00000140563 | MCTP2     | 3.072 | -0.489 | 0.713 | 0.00762906  | 0.032176066 |
| ENSG00000136100 | VPS36     | 4.735 | -0.238 | 0.848 | 0.007632614 | 0.032178091 |
| ENSG00000136143 | SUCLA2    | 4.658 | -0.175 | 0.886 | 0.007657175 | 0.032261003 |
| ENSG00000103710 | RASL12    | 5.405 | 0.252  | 1.191 | 0.007658444 | 0.032261003 |
| ENSG00000114631 | PODXL2    | 2.944 | 0.409  | 1.328 | 0.007691822 | 0.032388572 |
| ENSG00000124571 | XPO5      | 4.374 | 0.207  | 1.155 | 0.007702895 | 0.032422158 |
| ENSG00000134330 | IAH1      | 4.575 | 0.240  | 1.181 | 0.007731553 | 0.032529702 |
| ENSG00000121058 | COIL      | 3.415 | -0.189 | 0.878 | 0.007750609 | 0.032596776 |
| ENSG00000257742 |           | 3.234 | -0.217 | 0.860 | 0.007755779 | 0.032605421 |
| ENSG00000129422 | MTUS1     | 6.284 | -0.535 | 0.690 | 0.007774978 | 0.032673012 |
| ENSG00000001084 | GCLC      | 3.600 | -0.245 | 0.844 | 0.007805097 | 0.032786417 |
| ENSG00000234444 | ZNF736    | 2.922 | -0.418 | 0.749 | 0.007872213 | 0.033055085 |



|                 |          |       |        |       |             |             |
|-----------------|----------|-------|--------|-------|-------------|-------------|
| ENSG00000147180 | ZNF711   | 2.653 | -0.394 | 0.761 | 0.007881124 | 0.033079231 |
| ENSG00000109618 | SEPSECS  | 3.460 | -0.290 | 0.818 | 0.00789589  | 0.033127925 |
| ENSG00000183963 | SMTN     | 5.690 | 0.243  | 1.184 | 0.007918034 | 0.033207525 |
| ENSG00000141499 | WRAP53   | 2.635 | 0.322  | 1.250 | 0.007933204 | 0.033257819 |
| ENSG00000165672 | PRDX3    | 6.060 | -0.165 | 0.892 | 0.007940015 | 0.03327305  |
| ENSG00000198420 | TCAF1    | 4.181 | -0.194 | 0.874 | 0.007963983 | 0.033360134 |
| ENSG00000144867 | SRPRB    | 6.205 | 0.218  | 1.163 | 0.007993681 | 0.033471141 |
| ENSG00000229119 |          | 5.706 | 0.549  | 1.463 | 0.00800601  | 0.03350936  |
| ENSG00000260032 | NORAD    | 9.037 | -0.228 | 0.854 | 0.008033615 | 0.033611462 |
| ENSG00000204130 | RUFY2    | 3.862 | -0.256 | 0.837 | 0.008041309 | 0.033630213 |
| ENSG00000076706 | MCAM     | 3.812 | 1.107  | 2.154 | 0.008045587 | 0.033634665 |
| ENSG00000115966 | ATF2     | 5.041 | -0.223 | 0.857 | 0.008073214 | 0.033736689 |
| ENSG00000111817 | DSE      | 5.984 | -0.254 | 0.839 | 0.008087072 | 0.033781115 |
| ENSG00000172269 | DPAGT1   | 4.101 | 0.169  | 1.124 | 0.008094666 | 0.033788267 |
| ENSG00000115993 | TRAK2    | 5.242 | 0.248  | 1.188 | 0.00809524  | 0.033788267 |
| ENSG00000186577 | C6orf1   | 3.148 | 0.407  | 1.326 | 0.008100283 | 0.033795841 |
| ENSG00000156858 | PRR14    | 4.631 | 0.220  | 1.165 | 0.008104829 | 0.033801335 |
| ENSG00000065243 | PKN2     | 5.149 | -0.280 | 0.824 | 0.008124849 | 0.033857294 |
| ENSG00000198642 | KLHL9    | 5.234 | -0.252 | 0.840 | 0.008127284 | 0.033857294 |
| ENSG00000130311 | DDA1     | 4.549 | 0.206  | 1.153 | 0.008129366 | 0.033857294 |
| ENSG00000167967 | E4F1     | 4.191 | 0.282  | 1.216 | 0.008131184 | 0.033857294 |
| ENSG00000157426 | AASDH    | 3.560 | -0.189 | 0.877 | 0.008159836 | 0.033963088 |
| ENSG00000140941 | MAP1LC3B | 5.893 | 0.216  | 1.161 | 0.008183223 | 0.034046891 |
| ENSG00000134996 | OSTF1    | 4.748 | 0.261  | 1.198 | 0.008195435 | 0.034077568 |
| ENSG00000107864 | CPEB3    | 2.906 | -0.371 | 0.773 | 0.008199627 | 0.034077568 |
| ENSG00000116586 | LAMTOR2  | 4.351 | 0.469  | 1.385 | 0.008200362 | 0.034077568 |
| ENSG00000102781 | KATNAL1  | 4.548 | 0.323  | 1.251 | 0.00821208  | 0.034105478 |
| ENSG00000213719 | CLIC1    | 7.636 | 0.387  | 1.308 | 0.008213595 | 0.034105478 |
| ENSG00000169375 | SIN3A    | 5.208 | -0.230 | 0.852 | 0.008221298 | 0.034116064 |
| ENSG00000101166 | PRELID3B | 4.328 | 0.207  | 1.155 | 0.008222662 | 0.034116064 |
| ENSG00000146676 | PURB     | 5.209 | -0.194 | 0.874 | 0.008248695 | 0.034210516 |
| ENSG00000064932 | SBNO2    | 6.125 | 0.234  | 1.176 | 0.008255153 | 0.034223741 |
| ENSG00000174915 | PTDSS2   | 4.607 | 0.258  | 1.196 | 0.008284809 | 0.034333088 |
| ENSG00000189157 | FAM47E   | 2.807 | -0.279 | 0.824 | 0.008334431 | 0.034518357 |
| ENSG00000169221 | TBC1D10B | 4.913 | 0.150  | 1.110 | 0.008336111 | 0.034518357 |
| ENSG00000163866 | SMIM12   | 4.134 | 0.219  | 1.164 | 0.008345969 | 0.034545514 |
| ENSG00000124459 | ZNF45    | 3.132 | -0.282 | 0.822 | 0.008351883 | 0.034556331 |
| ENSG00000149289 | ZC3H12C  | 2.688 | -0.358 | 0.780 | 0.008431362 | 0.034871394 |
| ENSG00000080546 | SESN1    | 4.184 | -0.231 | 0.852 | 0.008438569 | 0.034887417 |
| ENSG00000266714 | MYO15B   | 6.057 | -0.304 | 0.810 | 0.008448291 | 0.03491382  |
| ENSG00000104412 | EMC2     | 5.369 | -0.177 | 0.885 | 0.008473029 | 0.035002239 |
| ENSG00000147099 | HDAC8    | 3.635 | 0.153  | 1.112 | 0.008505937 | 0.035115827 |
| ENSG00000136682 | CBWD2    | 3.931 | -0.205 | 0.867 | 0.008507235 | 0.035115827 |
| ENSG00000160446 | ZDHHC12  | 2.722 | 0.368  | 1.290 | 0.008541546 | 0.035243558 |
| ENSG00000170634 | ACYP2    | 3.523 | -0.264 | 0.833 | 0.008553845 | 0.035271612 |
| ENSG00000168763 | CNNM3    | 3.188 | -0.304 | 0.810 | 0.008555084 | 0.035271612 |
| ENSG00000138814 | PPP3CA   | 7.825 | 0.200  | 1.149 | 0.008588647 | 0.035396046 |
| ENSG00000121680 | PEX16    | 3.960 | 0.316  | 1.245 | 0.008604072 | 0.03544566  |
| ENSG00000078124 | ACER3    | 3.022 | 0.252  | 1.191 | 0.008616662 | 0.035483565 |
| ENSG00000131067 | GGT7     | 5.133 | -0.156 | 0.897 | 0.008628318 | 0.03551759  |
| ENSG00000142459 | EVI5L    | 3.385 | 0.235  | 1.177 | 0.008662522 | 0.035644373 |
| ENSG00000169964 | TMEM42   | 4.350 | -0.260 | 0.835 | 0.008698747 | 0.035777681 |

|                 |             |       |        |       |             |             |
|-----------------|-------------|-------|--------|-------|-------------|-------------|
| ENSG00000172965 | MIR4435-2HG | 3.110 | 0.456  | 1.372 | 0.008702837 | 0.035777681 |
| ENSG00000136158 | SPRY2       | 5.928 | -0.398 | 0.759 | 0.008705173 | 0.035777681 |
| ENSG00000082458 | DLG3        | 3.842 | -0.167 | 0.891 | 0.00872074  | 0.035827591 |
| ENSG00000030582 | GRN         | 7.906 | 0.334  | 1.261 | 0.00879672  | 0.036125565 |
| ENSG00000184867 | ARMCX2      | 5.990 | -0.190 | 0.877 | 0.008825513 | 0.036229597 |
| ENSG00000154134 | ROBO3       | 3.800 | 0.372  | 1.294 | 0.008840779 | 0.036278038 |
| ENSG00000110696 | C11orf58    | 7.006 | -0.151 | 0.901 | 0.008850827 | 0.03629485  |
| ENSG00000188690 | UROS        | 3.723 | 0.381  | 1.302 | 0.00885181  | 0.03629485  |
| ENSG00000104915 | STX10       | 4.855 | 0.324  | 1.252 | 0.008857576 | 0.036304272 |
| ENSG00000075711 | DLG1        | 5.974 | 0.337  | 1.263 | 0.008868002 | 0.036332776 |
| ENSG00000177868 | SVBP        | 2.669 | 0.408  | 1.327 | 0.00887466  | 0.036335248 |
| ENSG00000183696 | UPP1        | 4.218 | 0.380  | 1.301 | 0.008875547 | 0.036335248 |
| ENSG00000115963 | RND3        | 5.201 | 0.289  | 1.221 | 0.008924115 | 0.036519796 |
| ENSG00000083097 | DOPEY1      | 4.073 | -0.535 | 0.690 | 0.008936548 | 0.036551866 |
| ENSG00000163520 | FBLN2       | 3.827 | 0.843  | 1.794 | 0.008938936 | 0.036551866 |
| ENSG00000130706 | ADRM1       | 4.238 | 0.260  | 1.198 | 0.009005099 | 0.036796878 |
| ENSG00000009780 | FAM76A      | 3.799 | 0.203  | 1.151 | 0.009005885 | 0.036796878 |
| ENSG00000150051 | MKX         | 3.392 | -0.413 | 0.751 | 0.009030908 | 0.036884724 |
| ENSG00000204435 | CSNK2B      | 3.560 | 0.431  | 1.348 | 0.009051103 | 0.036952785 |
| ENSG00000160072 | ATAD3B      | 4.600 | 0.253  | 1.192 | 0.009084594 | 0.037063506 |
| ENSG00000198625 | MDM4        | 5.178 | -0.271 | 0.829 | 0.009085303 | 0.037063506 |
| ENSG00000074416 | MGLL        | 4.942 | 0.226  | 1.169 | 0.009096903 | 0.037096371 |
| ENSG00000130787 | HIP1R       | 4.186 | -0.290 | 0.818 | 0.009102967 | 0.037106644 |
| ENSG00000100387 | RBX1        | 2.832 | 0.352  | 1.276 | 0.009111655 | 0.037127601 |
| ENSG00000180817 | PPA1        | 5.731 | 0.204  | 1.152 | 0.009118188 | 0.037139763 |
| ENSG00000129071 | MBD4        | 4.752 | -0.136 | 0.910 | 0.009139765 | 0.03721317  |
| ENSG00000128513 | POT1        | 4.145 | -0.205 | 0.868 | 0.009172193 | 0.037330682 |
| ENSG00000103160 | HSDL1       | 3.766 | -0.189 | 0.877 | 0.009207761 | 0.037460881 |
| ENSG00000140511 | HAPLN3      | 5.170 | 0.219  | 1.164 | 0.009221726 | 0.037496784 |
| ENSG00000134569 | LRP4        | 3.838 | 0.386  | 1.307 | 0.00922375  | 0.037496784 |
| ENSG00000198546 | ZNF511      | 3.218 | 0.360  | 1.283 | 0.009243928 | 0.037553321 |
| ENSG00000230630 | DNM3OS      | 3.556 | -0.226 | 0.855 | 0.009244833 | 0.037553321 |
| ENSG00000110446 | SLC15A3     | 3.126 | -0.408 | 0.754 | 0.009277467 | 0.037671265 |
| ENSG00000184785 | SMIM10      | 3.107 | -0.259 | 0.836 | 0.009294689 | 0.037726563 |
| ENSG00000123009 | NME2P1      | 4.240 | 0.391  | 1.311 | 0.009307214 | 0.037762759 |
| ENSG00000153147 | SMARCA5     | 5.811 | -0.187 | 0.878 | 0.009337703 | 0.037871783 |
| ENSG00000137478 | FCHSD2      | 5.701 | -0.230 | 0.853 | 0.009341743 | 0.037873496 |
| ENSG00000119231 | SENP5       | 4.570 | -0.188 | 0.878 | 0.009355028 | 0.037912671 |
| ENSG00000182247 | UBE2E2      | 3.770 | 0.210  | 1.157 | 0.009381375 | 0.038004734 |
| ENSG00000135472 | FAIM2       | 2.806 | -0.323 | 0.800 | 0.009417073 | 0.038134591 |
| ENSG00000258486 |             | 4.605 | 0.835  | 1.784 | 0.009431308 | 0.038164816 |
| ENSG00000119729 | RHOQ        | 5.354 | 0.158  | 1.116 | 0.009431828 | 0.038164816 |
| ENSG00000111229 | ARPC3       | 6.018 | 0.345  | 1.270 | 0.009451245 | 0.038228605 |
| ENSG00000113593 | PPWD1       | 4.962 | -0.192 | 0.876 | 0.009458682 | 0.038243908 |
| ENSG00000106261 | ZKSCAN1     | 6.885 | -0.306 | 0.809 | 0.009475884 | 0.038298671 |
| ENSG00000148411 | NACC2       | 3.672 | -0.231 | 0.852 | 0.009483918 | 0.038316348 |
| ENSG00000133026 | MYH10       | 4.837 | -0.323 | 0.799 | 0.009508502 | 0.038400849 |
| ENSG00000119471 | HSDL2       | 4.294 | -0.172 | 0.888 | 0.009517379 | 0.038421876 |
| ENSG00000171843 | MLLT3       | 3.407 | -0.257 | 0.837 | 0.009523856 | 0.038433201 |
| ENSG00000172830 | SSH3        | 4.325 | -0.188 | 0.878 | 0.009534147 | 0.038459903 |
| ENSG00000116679 | IVNS1ABP    | 9.638 | 0.318  | 1.246 | 0.009539053 | 0.038464872 |
| ENSG00000139289 | PHLDA1      | 6.953 | -0.268 | 0.831 | 0.009569149 | 0.038571372 |

|                 |            |        |        |       |             |             |
|-----------------|------------|--------|--------|-------|-------------|-------------|
| ENSG00000116157 | GPX7       | 3.982  | 0.293  | 1.226 | 0.009580002 | 0.038600254 |
| ENSG00000125148 | MT2A       | 9.691  | 0.523  | 1.437 | 0.009584027 | 0.038601612 |
| ENSG00000178338 | ZNF354B    | 2.681  | -0.306 | 0.809 | 0.00960193  | 0.038658848 |
| ENSG00000162869 | PPP1R21    | 3.681  | -0.189 | 0.877 | 0.009610036 | 0.03867661  |
| ENSG00000187778 | MCRS1      | 5.126  | 0.201  | 1.150 | 0.009630515 | 0.03874413  |
| ENSG00000143033 | MTF2       | 3.964  | -0.232 | 0.852 | 0.009645722 | 0.038790401 |
| ENSG00000179271 | GADD45GIP1 | 5.307  | 0.453  | 1.368 | 0.009685423 | 0.038935103 |
| ENSG00000137288 | UQCC2      | 4.151  | 0.365  | 1.288 | 0.009691805 | 0.038935277 |
| ENSG00000146278 | PNRC1      | 6.550  | -0.222 | 0.857 | 0.009692905 | 0.038935277 |
| ENSG00000160124 | CCDC58     | 2.967  | -0.233 | 0.851 | 0.00973516  | 0.03909001  |
| ENSG00000113761 | ZNF346     | 3.111  | -0.201 | 0.870 | 0.009825379 | 0.039437144 |
| ENSG00000168778 | TCTN2      | 4.103  | -0.276 | 0.826 | 0.00984016  | 0.039477513 |
| ENSG00000183298 | RPSAP19    | 2.663  | 0.487  | 1.401 | 0.009844792 | 0.039477513 |
| ENSG00000039650 | PNKP       | 4.313  | 0.191  | 1.142 | 0.009846751 | 0.039477513 |
| ENSG00000186130 | ZBTB6      | 3.398  | -0.222 | 0.857 | 0.009856258 | 0.039500501 |
| ENSG00000163710 | PCOLCE2    | 10.314 | 0.254  | 1.193 | 0.009865255 | 0.039515658 |
| ENSG00000135046 | ANXA1      | 9.284  | 0.240  | 1.181 | 0.009871125 | 0.039515658 |
| ENSG00000141569 | TRIM65     | 5.159  | 0.148  | 1.108 | 0.009871365 | 0.039515658 |
| ENSG00000108733 | PEX12      | 3.546  | -0.224 | 0.856 | 0.009884274 | 0.039552211 |
| ENSG00000121413 | ZSCAN18    | 4.866  | -0.216 | 0.861 | 0.009892085 | 0.03956834  |
| ENSG00000172432 | GTPBP2     | 5.038  | 0.196  | 1.146 | 0.00991317  | 0.039637535 |
| ENSG00000102241 | HTATSF1    | 6.180  | -0.164 | 0.892 | 0.009949923 | 0.039769301 |
| ENSG00000261597 |            | 2.618  | -0.294 | 0.815 | 0.009960879 | 0.039797894 |
| ENSG00000169914 | OTUD3      | 3.482  | -0.314 | 0.804 | 0.009970236 | 0.039808595 |
| ENSG00000154743 | TSEN2      | 2.689  | -0.203 | 0.869 | 0.009971163 | 0.039808595 |
| ENSG00000104324 | CPQ        | 6.714  | -0.222 | 0.857 | 0.009987425 | 0.039846727 |
| ENSG00000120616 | EPC1       | 4.840  | -0.171 | 0.888 | 0.009990926 | 0.039846727 |
| ENSG00000103496 | STX4       | 5.163  | 0.311  | 1.240 | 0.009992134 | 0.039846727 |
| ENSG00000170310 | STX8       | 4.409  | 0.352  | 1.276 | 0.009997837 | 0.039854285 |
| ENSG00000075399 | VPS9D1     | 3.474  | 0.318  | 1.246 | 0.010043864 | 0.04001145  |
| ENSG00000134987 | WDR36      | 4.343  | -0.244 | 0.844 | 0.010044907 | 0.04001145  |
| ENSG00000125945 | ZNF436     | 3.833  | -0.261 | 0.835 | 0.010070917 | 0.040099795 |
| ENSG00000119862 | LGALSL     | 4.943  | 0.174  | 1.128 | 0.010088837 | 0.040155871 |
| ENSG00000183340 | JRKL       | 4.365  | -0.290 | 0.818 | 0.010099575 | 0.040183333 |
| ENSG00000166432 | ZMAT1      | 4.541  | -0.463 | 0.726 | 0.010103638 | 0.040184225 |
| ENSG00000130821 | SLC6A8     | 5.919  | 0.184  | 1.136 | 0.010111059 | 0.040198466 |
| ENSG00000112739 | PRPF4B     | 5.538  | -0.214 | 0.862 | 0.010126291 | 0.04024374  |
| ENSG00000221909 | FAM200A    | 2.670  | -0.253 | 0.839 | 0.010132271 | 0.040252223 |
| ENSG00000188566 | NDOR1      | 2.895  | 0.194  | 1.144 | 0.01014784  | 0.040298783 |
| ENSG00000164985 | PSIP1      | 5.692  | -0.174 | 0.886 | 0.010158676 | 0.040326514 |
| ENSG00000112343 | TRIM38     | 4.178  | -0.188 | 0.878 | 0.010196605 | 0.040449598 |
| ENSG00000170500 | LONRF2     | 3.269  | -0.489 | 0.713 | 0.01019741  | 0.040449598 |
| ENSG00000133818 | RRAS2      | 3.024  | -0.218 | 0.860 | 0.010201482 | 0.040450423 |
| ENSG00000182934 | SRPRA      | 7.360  | 0.186  | 1.138 | 0.010218122 | 0.040486719 |
| ENSG00000150787 | PTS        | 3.802  | 0.259  | 1.196 | 0.010222431 | 0.040486719 |
| ENSG00000172428 | COPS9      | 4.724  | 0.491  | 1.406 | 0.010225051 | 0.040486719 |
| ENSG00000143748 | NVL        | 3.542  | -0.240 | 0.847 | 0.010226107 | 0.040486719 |
| ENSG00000214413 | BBIP1      | 4.035  | -0.186 | 0.879 | 0.010238881 | 0.040521969 |
| ENSG00000158292 | GPR153     | 4.639  | 0.578  | 1.492 | 0.010275283 | 0.040650665 |
| ENSG00000173264 | GPR137     | 4.048  | 0.246  | 1.186 | 0.010330279 | 0.040847505 |
| ENSG00000187240 | DYNC2H1    | 4.498  | -0.392 | 0.762 | 0.010332842 | 0.040847505 |
| ENSG00000119979 | FAM45A     | 3.638  | -0.179 | 0.883 | 0.010339667 | 0.040859055 |

|                 |           |       |        |       |             |             |
|-----------------|-----------|-------|--------|-------|-------------|-------------|
| ENSG00000111775 | COX6A1    | 3.737 | 0.427  | 1.345 | 0.010384325 | 0.041020042 |
| ENSG00000152795 | HNRNPDL   | 7.758 | -0.143 | 0.905 | 0.010397319 | 0.041040745 |
| ENSG00000153395 | LPCAT1    | 5.547 | 0.202  | 1.151 | 0.010399133 | 0.041040745 |
| ENSG00000148334 | PTGES2    | 4.387 | 0.306  | 1.237 | 0.010401328 | 0.041040745 |
| ENSG00000162430 | SELENON   | 4.559 | 0.256  | 1.194 | 0.010408752 | 0.041054567 |
| ENSG00000143321 | HDGF      | 7.019 | 0.163  | 1.120 | 0.010468167 | 0.041266017 |
| ENSG00000182700 | IGIP      | 4.644 | -0.176 | 0.885 | 0.010470247 | 0.041266017 |
| ENSG00000165474 | GJB2      | 3.414 | 0.999  | 1.998 | 0.010475583 | 0.041271512 |
| ENSG00000124479 | NDP       | 3.242 | 0.478  | 1.393 | 0.010479946 | 0.041273166 |
| ENSG00000205517 | RGL3      | 4.095 | 0.192  | 1.143 | 0.010503841 | 0.041351714 |
| ENSG00000015676 | NUDCD3    | 6.221 | -0.152 | 0.900 | 0.010520256 | 0.041387923 |
| ENSG00000156466 | GDF6      | 5.418 | 0.866  | 1.823 | 0.010520946 | 0.041387923 |
| ENSG00000185187 | SIGIRR    | 3.875 | 0.455  | 1.370 | 0.010562478 | 0.041535696 |
| ENSG00000110237 | ARHGEF17  | 5.932 | -0.240 | 0.847 | 0.010603981 | 0.041683242 |
| ENSG00000162745 | OLFML2B   | 5.796 | 0.547  | 1.461 | 0.010608585 | 0.041685685 |
| ENSG00000115942 | ORC2      | 4.180 | -0.201 | 0.870 | 0.010619646 | 0.041713492 |
| ENSG00000182534 | MXRA7     | 7.726 | 0.205  | 1.153 | 0.010630627 | 0.041740962 |
| ENSG00000159658 | EFCAB14   | 6.509 | -0.214 | 0.862 | 0.010651858 | 0.041808643 |
| ENSG00000143256 | PFDN2     | 4.446 | 0.278  | 1.213 | 0.010679564 | 0.041901679 |
| ENSG00000227008 |           | 5.616 | 0.448  | 1.364 | 0.010693666 | 0.041934989 |
| ENSG00000112679 | DUSP22    | 4.933 | 0.172  | 1.127 | 0.010696066 | 0.041934989 |
| ENSG00000146648 | EGFR      | 5.216 | -0.288 | 0.819 | 0.010723911 | 0.042028415 |
| ENSG00000103479 | RBL2      | 6.097 | -0.561 | 0.678 | 0.010731559 | 0.042042651 |
| ENSG00000135324 | MRAP2     | 4.795 | -0.395 | 0.760 | 0.010771125 | 0.04218187  |
| ENSG00000178307 | TMEM11    | 3.949 | 0.279  | 1.213 | 0.010805843 | 0.042302006 |
| ENSG00000196187 | TMEM63A   | 5.031 | -0.339 | 0.791 | 0.010893221 | 0.042611463 |
| ENSG00000161970 | RPL26     | 4.667 | 0.519  | 1.433 | 0.010896229 | 0.042611463 |
| ENSG00000145214 | DGKQ      | 3.775 | 0.150  | 1.110 | 0.010897104 | 0.042611463 |
| ENSG00000129596 | CDO1      | 9.451 | 0.279  | 1.214 | 0.010910283 | 0.042647066 |
| ENSG00000167325 | RRM1      | 4.769 | 0.175  | 1.129 | 0.010958966 | 0.042821372 |
| ENSG00000184182 | UBE2F     | 3.037 | 0.330  | 1.257 | 0.011006527 | 0.042968318 |
| ENSG00000116809 | ZBTB17    | 4.359 | 0.218  | 1.163 | 0.011008102 | 0.042968318 |
| ENSG00000162407 | PLPP3     | 6.352 | -0.442 | 0.736 | 0.011008887 | 0.042968318 |
| ENSG00000075234 | TTC38     | 4.202 | -0.153 | 0.900 | 0.011024669 | 0.043013879 |
| ENSG00000107560 | RAB11FIP2 | 3.961 | -0.251 | 0.840 | 0.011044824 | 0.043065517 |
| ENSG00000258289 | CHURC1    | 5.485 | -0.191 | 0.876 | 0.011046635 | 0.043065517 |
| ENSG00000179941 | BBS10     | 4.185 | -0.349 | 0.785 | 0.011050246 | 0.043065517 |
| ENSG00000128245 | YWHAH     | 6.194 | 0.238  | 1.179 | 0.011059136 | 0.043084123 |
| ENSG00000167987 | VPS37C    | 3.899 | 0.176  | 1.130 | 0.011078116 | 0.043142008 |
| ENSG00000168803 | ADAL      | 3.399 | -0.183 | 0.881 | 0.011089208 | 0.043169143 |
| ENSG00000114841 | DNAH1     | 4.223 | -0.337 | 0.792 | 0.011094529 | 0.043173804 |
| ENSG00000096717 | SIRT1     | 4.230 | -0.324 | 0.799 | 0.011123673 | 0.043269006 |
| ENSG00000136436 | CALCOCO2  | 5.697 | -0.124 | 0.918 | 0.011127261 | 0.043269006 |
| ENSG00000070756 | PABPC1    | 7.954 | 0.167  | 1.123 | 0.011158265 | 0.043373458 |
| ENSG00000106772 | PRUNE2    | 5.377 | -0.428 | 0.743 | 0.011184867 | 0.043456582 |
| ENSG00000196305 | IARS      | 6.610 | 0.227  | 1.170 | 0.011187953 | 0.043456582 |
| ENSG00000185000 | DGAT1     | 4.411 | 0.236  | 1.178 | 0.011217882 | 0.043548015 |
| ENSG00000196642 | RABL6     | 5.595 | 0.272  | 1.208 | 0.011219812 | 0.043548015 |
| ENSG00000076003 | MCM6      | 4.688 | -0.205 | 0.868 | 0.011228183 | 0.04356435  |
| ENSG00000012660 | ELOVL5    | 5.481 | 0.228  | 1.171 | 0.01126366  | 0.043685807 |
| ENSG00000185745 | IFIT1     | 3.990 | -0.335 | 0.793 | 0.011274166 | 0.043686892 |
| ENSG00000131375 | CAPN7     | 5.332 | -0.208 | 0.865 | 0.011275587 | 0.043686892 |

|                 |          |       |        |       |             |             |
|-----------------|----------|-------|--------|-------|-------------|-------------|
| ENSG00000184009 | ACTG1    | 9.985 | 0.243  | 1.184 | 0.01127646  | 0.043686892 |
| ENSG00000181894 | ZNF329   | 2.786 | -0.183 | 0.881 | 0.011307166 | 0.043789648 |
| ENSG00000105497 | ZNF175   | 3.329 | -0.291 | 0.817 | 0.011315929 | 0.04379342  |
| ENSG00000149308 | NPAT     | 3.474 | -0.274 | 0.827 | 0.011325836 | 0.04379342  |
| ENSG00000006377 | DLX6     | 3.155 | -0.285 | 0.821 | 0.011326296 | 0.04379342  |
| ENSG00000213080 |          | 2.870 | -0.247 | 0.843 | 0.011327711 | 0.04379342  |
| ENSG00000151746 | BICD1    | 2.799 | 0.373  | 1.295 | 0.011329058 | 0.04379342  |
| ENSG00000174640 | SLCO2A1  | 2.524 | -1.071 | 0.476 | 0.011333626 | 0.043794905 |
| ENSG00000134755 | DSC2     | 3.581 | 0.694  | 1.617 | 0.011345379 | 0.043824145 |
| ENSG00000163125 | RPRD2    | 5.144 | -0.259 | 0.836 | 0.011350289 | 0.043825823 |
| ENSG00000153187 | HNRNPU   | 7.462 | -0.148 | 0.902 | 0.011354187 | 0.043825823 |
| ENSG00000177453 | NIM1K    | 3.952 | 0.234  | 1.176 | 0.011379931 | 0.043909002 |
| ENSG00000213676 | ATF6B    | 5.848 | -0.183 | 0.881 | 0.011385886 | 0.043915791 |
| ENSG00000055208 | TAB2     | 6.000 | -0.198 | 0.872 | 0.011431208 | 0.044074361 |
| ENSG00000142178 | SIK1     | 4.621 | 0.611  | 1.527 | 0.011436307 | 0.044077785 |
| ENSG00000072422 | RHOBTB1  | 5.045 | -0.301 | 0.811 | 0.011472524 | 0.044201096 |
| ENSG00000164209 | SLC25A46 | 5.172 | -0.182 | 0.881 | 0.011499084 | 0.044287126 |
| ENSG00000048028 | USP28    | 3.851 | -0.245 | 0.844 | 0.011525568 | 0.044372803 |
| ENSG00000196653 | ZNF502   | 2.660 | -0.217 | 0.860 | 0.011531427 | 0.044379034 |
| ENSG00000146535 | GNA12    | 5.724 | 0.175  | 1.129 | 0.011589817 | 0.04458736  |
| ENSG00000104320 | NBN      | 4.850 | -0.249 | 0.842 | 0.011675586 | 0.044900822 |
| ENSG00000145029 | NICN1    | 3.280 | -0.401 | 0.757 | 0.011719908 | 0.045054719 |
| ENSG00000117480 | FAAH     | 4.253 | 0.287  | 1.220 | 0.011758845 | 0.045187809 |
| ENSG00000177106 | EPS8L2   | 6.992 | 0.182  | 1.134 | 0.01179376  | 0.045305351 |
| ENSG00000152022 |          | 5.287 | -0.154 | 0.899 | 0.01180237  | 0.045316791 |
| ENSG00000134851 | TMEM165  | 5.634 | 0.179  | 1.132 | 0.011805396 | 0.045316791 |
| ENSG00000147862 | NFIB     | 5.628 | -0.264 | 0.833 | 0.011828415 | 0.045372246 |
| ENSG00000188677 | PARVB    | 4.223 | 0.322  | 1.250 | 0.011829182 | 0.045372246 |
| ENSG00000112062 | MAPK14   | 4.894 | 0.153  | 1.112 | 0.011832846 | 0.045372246 |
| ENSG00000133424 | LARGE1   | 2.714 | -0.225 | 0.855 | 0.011839332 | 0.045380494 |
| ENSG00000108950 | FAM20A   | 2.858 | -0.805 | 0.572 | 0.011845983 | 0.0453888   |
| ENSG00000134897 | BIVM     | 4.060 | -0.173 | 0.887 | 0.011851518 | 0.0453888   |
| ENSG00000001460 | STPG1    | 2.814 | 0.220  | 1.165 | 0.011854507 | 0.0453888   |
| ENSG00000034510 | TMSB10   | 7.044 | 0.674  | 1.595 | 0.011882143 | 0.045477978 |
| ENSG00000177427 | MIEF2    | 3.278 | -0.198 | 0.871 | 0.011901707 | 0.045536208 |
| ENSG00000130165 | ELOF1    | 4.797 | 0.278  | 1.213 | 0.01190708  | 0.045540122 |
| ENSG00000107372 | ZFAND5   | 7.161 | -0.230 | 0.853 | 0.011952766 | 0.045698158 |
| ENSG00000137822 | TUBGCP4  | 4.451 | -0.215 | 0.862 | 0.011982111 | 0.045783875 |
| ENSG00000141562 | NARF     | 5.542 | 0.237  | 1.179 | 0.011983934 | 0.045783875 |
| ENSG00000173011 | TADA2B   | 4.428 | -0.188 | 0.878 | 0.012004288 | 0.045833147 |
| ENSG00000141140 |          | 4.431 | 0.199  | 1.148 | 0.012005587 | 0.045833147 |
| ENSG00000006757 | PNPLA4   | 3.725 | 0.178  | 1.131 | 0.012027941 | 0.045901743 |
| ENSG00000175970 | UNC119B  | 5.269 | -0.248 | 0.842 | 0.012054521 | 0.045970104 |
| ENSG00000117676 | RPS6KA1  | 3.086 | -0.271 | 0.829 | 0.012054637 | 0.045970104 |
| ENSG00000100991 | TRPC4AP  | 6.291 | 0.127  | 1.092 | 0.012088192 | 0.04606583  |
| ENSG00000107679 | PLEKHA1  | 6.711 | 0.288  | 1.221 | 0.01208854  | 0.04606583  |
| ENSG00000149532 | CPSF7    | 5.977 | -0.181 | 0.882 | 0.012126711 | 0.046172328 |
| ENSG00000142556 | ZNF614   | 2.865 | -0.260 | 0.835 | 0.012128152 | 0.046172328 |
| ENSG00000113643 | RARS     | 5.578 | 0.140  | 1.102 | 0.012129719 | 0.046172328 |
| ENSG00000049656 | CLPTM1L  | 6.268 | 0.161  | 1.118 | 0.012146528 | 0.046219504 |
| ENSG00000004777 | ARHGAP33 | 3.498 | 0.195  | 1.145 | 0.01216947  | 0.046289974 |
| ENSG00000106025 | TSPAN12  | 2.617 | 0.271  | 1.207 | 0.012184171 | 0.046329061 |

|                 |           |       |        |       |             |             |
|-----------------|-----------|-------|--------|-------|-------------|-------------|
| ENSG0000067048  | DDX3Y     | 5.347 | -0.557 | 0.680 | 0.012208777 | 0.046405766 |
| ENSG00000234745 | HLA-B     | 8.619 | -0.396 | 0.760 | 0.012218384 | 0.046414142 |
| ENSG00000198300 | PEG3      | 4.276 | -0.359 | 0.780 | 0.012223219 | 0.046414142 |
| ENSG00000198355 | PIM3      | 5.930 | -0.261 | 0.834 | 0.012224283 | 0.046414142 |
| ENSG00000071242 | RPS6KA2   | 3.727 | -0.321 | 0.800 | 0.012230278 | 0.046420068 |
| ENSG00000187514 | PTMA      | 8.331 | 0.238  | 1.179 | 0.012299596 | 0.046666246 |
| ENSG00000010017 | RANBP9    | 5.601 | 0.177  | 1.130 | 0.012332549 | 0.046774321 |
| ENSG00000234664 | HMGN2P5   | 4.154 | -0.183 | 0.881 | 0.012345547 | 0.046806658 |
| ENSG00000110888 | CAPRN2    | 4.748 | -0.236 | 0.849 | 0.01237523  | 0.046884695 |
| ENSG00000099949 | LZTR1     | 5.437 | 0.125  | 1.090 | 0.012378295 | 0.046884695 |
| ENSG00000151470 | C4orf33   | 2.848 | -0.187 | 0.878 | 0.012379566 | 0.046884695 |
| ENSG00000122482 | ZNF644    | 3.850 | -0.206 | 0.867 | 0.012387888 | 0.046899245 |
| ENSG00000133193 | FAM104A   | 3.083 | -0.280 | 0.824 | 0.012412837 | 0.046976708 |
| ENSG00000107554 | DNMBP     | 4.422 | 0.201  | 1.150 | 0.012439827 | 0.047043065 |
| ENSG00000176422 | SPRYD4    | 2.869 | -0.211 | 0.864 | 0.012441385 | 0.047043065 |
| ENSG00000187210 | GCNT1     | 4.617 | -0.332 | 0.795 | 0.012443852 | 0.047043065 |
| ENSG00000107130 | NCS1      | 3.397 | 0.369  | 1.292 | 0.012450969 | 0.047052977 |
| ENSG00000186687 | LYRM7     | 3.857 | -0.216 | 0.861 | 0.012482383 | 0.047154668 |
| ENSG00000012822 | CALCOCO1  | 6.601 | -0.258 | 0.836 | 0.012536628 | 0.047342503 |
| ENSG00000182873 | PRKCZ-AS1 | 3.169 | -0.415 | 0.750 | 0.012545992 | 0.047360782 |
| ENSG00000127083 | OMD       | 8.498 | 0.527  | 1.441 | 0.01257686  | 0.047450583 |
| ENSG00000038274 | MAT2B     | 5.862 | -0.193 | 0.875 | 0.012583062 | 0.047450583 |
| ENSG00000196365 | LONP1     | 5.921 | 0.185  | 1.137 | 0.01258338  | 0.047450583 |
| ENSG00000005882 | PDK2      | 3.241 | -0.251 | 0.840 | 0.012594695 | 0.047476151 |
| ENSG00000118276 | B4GALT6   | 4.331 | -0.288 | 0.819 | 0.012600169 | 0.047479686 |
| ENSG00000197056 | ZMYM1     | 3.143 | -0.305 | 0.809 | 0.012604817 | 0.047480111 |
| ENSG00000162704 | ARPC5     | 6.171 | 0.256  | 1.194 | 0.012630716 | 0.047560552 |
| ENSG00000081019 | RSBN1     | 4.310 | -0.234 | 0.850 | 0.012643831 | 0.047569732 |
| ENSG00000153066 | TXNDC11   | 5.782 | 0.136  | 1.099 | 0.012646101 | 0.047569732 |
| ENSG00000165813 | CCDC186   | 4.708 | -0.362 | 0.778 | 0.012646787 | 0.047569732 |
| ENSG00000109220 | CHIC2     | 3.509 | 0.185  | 1.137 | 0.012699213 | 0.04774977  |
| ENSG00000082196 | C1QTNF3   | 4.401 | 0.470  | 1.385 | 0.012724159 | 0.047826391 |
| ENSG00000270015 |           | 3.403 | -0.464 | 0.725 | 0.012780255 | 0.048019994 |
| ENSG00000204253 | HNRNPCP2  | 4.542 | -0.194 | 0.874 | 0.012785828 | 0.048023699 |
| ENSG00000140350 | ANP32A    | 5.873 | -0.178 | 0.884 | 0.012795276 | 0.048041948 |
| ENSG00000145901 | TNIP1     | 6.467 | 0.158  | 1.115 | 0.01281151  | 0.048085653 |
| ENSG00000206530 | CFAP44    | 4.310 | -0.382 | 0.768 | 0.012847366 | 0.048202947 |
| ENSG00000133460 | SLC2A11   | 2.766 | -0.218 | 0.860 | 0.012906502 | 0.048407477 |
| ENSG00000139719 | VPS33A    | 2.785 | 0.241  | 1.181 | 0.012958239 | 0.048584113 |
| ENSG00000105662 | CRTC1     | 4.550 | 0.236  | 1.178 | 0.012990694 | 0.048688359 |
| ENSG00000148180 | GSN       | 9.956 | -0.312 | 0.806 | 0.01304591  | 0.048877804 |
| ENSG00000122417 | ODF2L     | 4.179 | -0.215 | 0.862 | 0.01306799  | 0.048943013 |
| ENSG00000049860 | HEXB      | 7.281 | -0.190 | 0.876 | 0.013076939 | 0.048959014 |
| ENSG00000085719 | CPNE3     | 6.390 | -0.204 | 0.868 | 0.013113772 | 0.049079358 |
| ENSG00000165757 | KIAA1462  | 4.921 | -0.352 | 0.784 | 0.013142243 | 0.049168336 |
| ENSG00000146416 | AIG1      | 5.496 | 0.160  | 1.117 | 0.01316243  | 0.049218252 |
| ENSG00000086504 | MRPL28    | 4.848 | 0.373  | 1.295 | 0.013164989 | 0.049218252 |
| ENSG00000081985 | IL12RB2   | 2.842 | -0.375 | 0.771 | 0.01317879  | 0.049252257 |
| ENSG00000171862 | PTEN      | 6.134 | 0.152  | 1.111 | 0.01319945  | 0.049310382 |
| ENSG00000197083 | ZNF300P1  | 3.502 | -0.278 | 0.825 | 0.013210621 | 0.049310382 |
| ENSG00000139546 | TARBP2    | 3.772 | 0.276  | 1.211 | 0.013210967 | 0.049310382 |
| ENSG00000026652 | AGPAT4    | 6.336 | 0.226  | 1.170 | 0.013213185 | 0.049310382 |

|                 |          |       |        |       |             |             |
|-----------------|----------|-------|--------|-------|-------------|-------------|
| ENSG00000147804 | SLC39A4  | 2.884 | 0.379  | 1.301 | 0.0132237   | 0.049332036 |
| ENSG00000135940 | COX5B    | 5.341 | 0.386  | 1.307 | 0.013249903 | 0.04941218  |
| ENSG00000111615 | KRR1     | 3.898 | -0.245 | 0.844 | 0.013257504 | 0.049422916 |
| ENSG00000156642 | NPTN     | 7.631 | 0.179  | 1.132 | 0.013286976 | 0.049515153 |
| ENSG00000138031 | ADCY3    | 4.338 | -0.411 | 0.752 | 0.013341762 | 0.049701623 |
| ENSG00000182022 | CHST15   | 4.492 | 0.286  | 1.219 | 0.013351212 | 0.049719133 |
| ENSG00000130766 | SESN2    | 3.351 | 0.241  | 1.181 | 0.013400259 | 0.049869586 |
| ENSG00000099810 | MTAP     | 3.766 | -0.171 | 0.888 | 0.013401141 | 0.049869586 |
| ENSG00000157216 | SSBP3    | 4.894 | -0.215 | 0.861 | 0.013412149 | 0.049892814 |
| ENSG00000253304 | TMEM200B | 2.985 | -0.279 | 0.824 | 0.0134214   | 0.04990949  |
| ENSG00000244754 | N4BP2L2  | 6.445 | -0.192 | 0.876 | 0.013431351 | 0.049926597 |
| ENSG00000113732 | ATP6V0E1 | 6.527 | 0.268  | 1.204 | 0.013437171 | 0.049926597 |
| ENSG00000120333 | MRPS14   | 4.024 | -0.154 | 0.899 | 0.013440308 | 0.049926597 |
