# Supplementary material for: Annotating Transcriptional Effects of Genetic Variants in Disease‐Relevant Tissue: Transcriptome‐Wide Allelic Imbalance in Osteoarthritic Cartilage
Source: PubMed Central journal article supplement — Arthritis Rheumatol. 2019 Feb 23;71(4):561–70. doi: 10.1002/art.40748 (PMC6593438; doi:10.1002/art.40748), 2019-02-23
Supplement: ART-71-561-s006.pdf [file ART-71-561-s006.pdf]

**Supplementary Table S5:** Significantly enriched GO terms among the differentially expressed genes (0.5>FC>2, FDR<0.05).

| Annotation Category | Cluster 1 Term                                  | Enrichment Score: 5.558267177348318 | Count | %     | PValue   | List Total | Pop Hits | Pop Total | Fold Enrichment | Bonferroni | Benjamini | FDR      | Genes                                                                                                                                                                                                                                                                                                                                                                                                                                                                                                                                                                                                                                                                                                                                                                                                                                                                                                                                                                                                                                                                                                                                           |
|---------------------|-------------------------------------------------|-------------------------------------|-------|-------|----------|------------|----------|-----------|-----------------|------------|-----------|----------|-------------------------------------------------------------------------------------------------------------------------------------------------------------------------------------------------------------------------------------------------------------------------------------------------------------------------------------------------------------------------------------------------------------------------------------------------------------------------------------------------------------------------------------------------------------------------------------------------------------------------------------------------------------------------------------------------------------------------------------------------------------------------------------------------------------------------------------------------------------------------------------------------------------------------------------------------------------------------------------------------------------------------------------------------------------------------------------------------------------------------------------------------|
| GOTERM_BP_ALL       | GO:0032501~multicellular organismal process     |                                     | 61    | 39.35 | 2.52E-09 | 125        | 1805     | 7505      | 2.03            | 3.03E-06   | 3.03E-06  | 4.08E-06 | ENSG00000128342, ENSG00000196136, ENSG00000188064, ENSG00000179542, ENSG00000100473, ENSG00000150938, ENSG00000118785, ENSG00000149968, ENSG00000145675, ENSG00000091137, ENSG00000106366, ENSG00000104332, ENSG00000172348, ENSG00000107623, ENSG00000146674, ENSG00000173198, ENSG00000074181, ENSG00000134363, ENSG00000162998, ENSG00000134259, ENSG00000146233, ENSG00000104783, ENSG00000165617, ENSG00000102466, ENSG00000151150, ENSG00000187957, ENSG00000095752, ENSG00000120149, ENSG00000052850, ENSG00000066382, ENSG00000002745, ENSG00000112280, ENSG00000180616, ENSG00000077063, ENSG00000006327, ENSG00000165973, ENSG00000152270, ENSG00000107984, ENSG00000159307, ENSG00000150938, ENSG00000118785, ENSG00000196878, ENSG00000111245, ENSG00000145675, ENSG00000106366, ENSG00000104332, ENSG00000168546, ENSG00000172348, ENSG00000153902, ENSG00000107623, ENSG00000146674, ENSG00000074181, ENSG00000176887, ENSG00000048052, ENSG00000122756, ENSG00000054938, ENSG00000166923, ENSG00000092054, ENSG00000182580, ENSG00000189056, ENSG00000133083, ENSG00000112175, ENSG00000114270, ENSG00000106565, ENSG00000164116 |
| GOTERM_BP_ALL       | GO:0048731~system development                   |                                     | 45    | 29.03 | 5.67E-08 | 125        | 1190     | 7505      | 2.27            | 6.82E-05   | 3.41E-05  | 9.17E-05 | ENSG00000102466, ENSG00000151150, ENSG00000187957, ENSG00000128342, ENSG00000095752, ENSG00000120149, ENSG00000052850, ENSG00000066382, ENSG00000112280, ENSG00000077063, ENSG00000188064, ENSG00000179542, ENSG00000006327, ENSG00000165973, ENSG00000152270, ENSG00000107984, ENSG00000159307, ENSG00000150938, ENSG00000118785, ENSG00000196878, ENSG00000111245, ENSG00000145675, ENSG00000106366, ENSG00000104332, ENSG00000168546, ENSG00000172348, ENSG00000153902, ENSG00000107623, ENSG00000146674, ENSG00000074181, ENSG00000176887, ENSG00000048052, ENSG00000122756, ENSG00000054938, ENSG00000166923, ENSG00000092054, ENSG00000182580, ENSG00000134363, ENSG00000189056, ENSG00000162998, ENSG00000134259, ENSG00000133083, ENSG00000112175, ENSG00000106565, ENSG00000114270                                                                                                                                                                                                                                                                                                                                                     |
| GOTERM_BP_ALL       | GO:0048856~anatomical structure development     |                                     | 47    | 30.32 | 1.25E-07 | 125        | 1312     | 7505      | 2.15            | 1.51E-04   | 5.02E-05  | 2.02E-04 | ENSG00000138449, ENSG00000102466, ENSG00000151150, ENSG00000187957, ENSG00000128342, ENSG00000095752, ENSG00000120149, ENSG00000052850, ENSG00000066382, ENSG00000112280, ENSG00000077063, ENSG00000188064, ENSG00000179542, ENSG00000006327, ENSG00000165973, ENSG00000152270, ENSG00000107984, ENSG00000159307, ENSG00000150938, ENSG00000118785, ENSG00000196878, ENSG00000034971, ENSG00000111245, ENSG00000145675, ENSG00000106366, ENSG00000104332, ENSG00000168546, ENSG00000172348, ENSG00000153902, ENSG00000107623, ENSG00000146674, ENSG00000074181, ENSG00000176887, ENSG00000048052, ENSG00000122756, ENSG00000054938, ENSG00000166923, ENSG00000092054, ENSG00000182580, ENSG00000134363, ENSG00000189056, ENSG00000162998, ENSG00000134259, ENSG00000133083, ENSG00000112175, ENSG00000106565, ENSG00000114270                                                                                                                                                                                                                                                                                                                   |
| GOTERM_BP_ALL       | GO:0032502~developmental process                |                                     | 53    | 34.19 | 2.78E-07 | 125        | 1631     | 7505      | 1.95            | 3.35E-04   | 8.37E-05  | 4.50E-04 | ENSG00000138449, ENSG00000128342, ENSG00000188064, ENSG00000179542, ENSG00000106538, ENSG00000150938, ENSG00000118785, ENSG00000145675, ENSG00000106366, ENSG00000104332, ENSG00000172348, ENSG00000107623, ENSG00000146674, ENSG00000074181, ENSG00000134363, ENSG00000134259, ENSG00000162998, ENSG00000052850, ENSG00000102466, ENSG00000187957, ENSG00000151150, ENSG00000095752, ENSG00000120149, ENSG00000052850, ENSG00000066382, ENSG00000112280, ENSG00000002745, ENSG00000077063, ENSG00000006327, ENSG00000165973, ENSG00000107984, ENSG00000152270, ENSG00000159307, ENSG00000182752, ENSG00000196878, ENSG00000034971, ENSG00000156076, ENSG00000111245, ENSG00000168546, ENSG00000153902, ENSG00000176887, ENSG00000048052, ENSG00000122756, ENSG00000166923, ENSG00000054938, ENSG00000182580, ENSG00000092054, ENSG00000127954, ENSG00000189056, ENSG00000133083, ENSG00000112175, ENSG00000106565, ENSG00000114270                                                                                                                                                                                                             |
| GOTERM_BP_ALL       | GO:0007275~multicellular organismal development |                                     | 48    | 30.97 | 1.20E-06 | 125        | 1462     | 7505      | 1.97            | 0.0014438  | 2.89E-04  | 0.001942 | ENSG00000102466, ENSG00000151150, ENSG00000187957, ENSG00000128342, ENSG00000095752, ENSG00000120149, ENSG00000052850, ENSG00000066382, ENSG00000002745, ENSG00000112280, ENSG00000077063, ENSG00000188064, ENSG00000179542, ENSG00000006327, ENSG00000165973, ENSG00000152270, ENSG00000107984, ENSG00000159307, ENSG00000150938, ENSG00000118785, ENSG00000196878, ENSG00000156076, ENSG00000111245, ENSG00000145675, ENSG00000106366, ENSG00000104332, ENSG00000168546, ENSG00000172348, ENSG00000153902, ENSG00000107623, ENSG00000146674, ENSG00000074181, ENSG00000176887, ENSG00000048052, ENSG00000122756, ENSG00000054938, ENSG00000166923, ENSG00000092054, ENSG00000182580, ENSG00000134363, ENSG00000189056, ENSG00000162998, ENSG00000134259, ENSG00000133083, ENSG00000112175, ENSG00000106565, ENSG00000114270, ENSG00000165617                                                                                                                                                                                                                                                                                                  |
| GOTERM_BP_ALL       | GO:0030154~cell differentiation                 |                                     | 30    | 19.35 | 3.36E-05 | 125        | 803      | 7505      | 2.24            | 0.0395919  | 0.0040316 | 0.05429  | ENSG00000151150, ENSG00000187957, ENSG00000128342, ENSG00000095752, ENSG00000112280, ENSG00000077063, ENSG00000006327, ENSG00000179542, ENSG00000159307, ENSG00000106538, ENSG00000182752, ENSG00000118785, ENSG00000196878, ENSG00000111245, ENSG00000145675, ENSG00000104332, ENSG00000153902, ENSG00000146674, ENSG00000074181, ENSG00000176887, ENSG00000048052, ENSG00000054938, ENSG00000182580, ENSG00000127954, ENSG00000189056, ENSG00000134259, ENSG00000162998, ENSG00000133083, ENSG00000112175, ENSG00000106565                                                                                                                                                                                                                                                                                                                                                                                                                                                                                                                                                                                                                    |

|               |                                               |    |       |          |     |     |      |      |           |           |          |                                                                                                                                                                                                                                                                                                                                                                                                                                                                                                                              |
|---------------|-----------------------------------------------|----|-------|----------|-----|-----|------|------|-----------|-----------|----------|------------------------------------------------------------------------------------------------------------------------------------------------------------------------------------------------------------------------------------------------------------------------------------------------------------------------------------------------------------------------------------------------------------------------------------------------------------------------------------------------------------------------------|
| GOTERM_BP_ALL | GO:0048869~cellular developmental process     | 30 | 19.35 | 9.53E-05 | 125 | 850 | 7505 | 2.12 | 0.1083103 | 0.0095076 | 0.153986 | ENSG00000151150, ENSG00000187957, ENSG00000128342, ENSG00000095752, ENSG00000112280, ENSG00000077063, ENSG00000006327, ENSG00000179542, ENSG00000159307, ENSG00000106538, ENSG00000182752, ENSG00000118785, ENSG00000196878, ENSG00000111245, ENSG00000145675, ENSG00000104332, ENSG00000153902, ENSG00000146674, ENSG00000074181, ENSG00000176887, ENSG00000048052, ENSG00000054938, ENSG00000182580, ENSG00000127954, ENSG00000189056, ENSG00000134259, ENSG00000162998, ENSG00000133083, ENSG00000112175, ENSG00000106565 |
| GOTERM_BP_ALL | GO:0048513~organ development                  | 30 | 19.35 | 1.99E-04 | 125 | 886 | 7505 | 2.03 | 0.212504  | 0.0182089 | 0.32063  | ENSG00000187957, ENSG00000128342, ENSG00000095752, ENSG00000120149, ENSG00000052850, ENSG00000112280, ENSG00000077063, ENSG00000188064, ENSG00000006327, ENSG00000107984, ENSG00000152270, ENSG00000159307, ENSG00000118785, ENSG00000196878, ENSG00000111245, ENSG00000145675, ENSG00000106366, ENSG00000104332, ENSG00000074181, ENSG00000176887, ENSG00000048052, ENSG00000054938, ENSG00000166923, ENSG00000092054, ENSG00000134363, ENSG00000189056, ENSG00000133083, ENSG00000112175, ENSG00000106565, ENSG00000114270 |
| GOTERM_BP_ALL | GO:0009653~anatomical structure morphogenesis | 22 | 14.19 | 0.002486 | 125 | 660 | 7505 | 2.00 | 0.9499364 | 0.1049771 | 3.945455 | ENSG00000034971, ENSG00000138449, ENSG00000111245, ENSG00000151150, ENSG00000106366, ENSG00000128342, ENSG00000104332, ENSG00000120149, ENSG00000052850, ENSG00000074181, ENSG00000112280, ENSG00000166923, ENSG00000188064, ENSG00000092054, ENSG00000006327, ENSG00000182580, ENSG00000179542, ENSG00000134363, ENSG00000107984, ENSG00000189056, ENSG00000133083, ENSG00000106565                                                                                                                                         |

**Annotation Cluster 2** Enrichment Score: **3.7785134419205586**

| Category      | Term                                     | Count | %     | PValue   | List Total | Pop Hits | Pop Total | Fold Enrichment | Bonferroni | Benjamini | FDR      | Genes                                                                                                                                                                                                                                                                                                                                                                                                                                                                                                                                                                                                                                                                                 |
|---------------|------------------------------------------|-------|-------|----------|------------|----------|-----------|-----------------|------------|-----------|----------|---------------------------------------------------------------------------------------------------------------------------------------------------------------------------------------------------------------------------------------------------------------------------------------------------------------------------------------------------------------------------------------------------------------------------------------------------------------------------------------------------------------------------------------------------------------------------------------------------------------------------------------------------------------------------------------|
| GOTERM_BP_ALL | GO:0006954~inflammatory response         | 13    | 8.39  | 1.58E-06 | 125        | 132      | 7505      | 5.91            | 0.0019018  | 3.17E-04  | 0.002559 | ENSG00000159307, ENSG00000196136, ENSG00000134259, ENSG00000128284, ENSG00000050628, ENSG00000173198, ENSG00000123838, ENSG00000118785, ENSG00000000971, ENSG00000196352, ENSG00000048052, ENSG00000123610, ENSG00000125730                                                                                                                                                                                                                                                                                                                                                                                                                                                           |
| GOTERM_BP_ALL | GO:0006952~defense response              | 16    | 10.32 | 2.35E-06 | 125        | 216      | 7505      | 4.45            | 0.0028258  | 4.04E-04  | 0.003804 | ENSG00000158270, ENSG00000196136, ENSG00000123838, ENSG00000173198, ENSG00000048052, ENSG00000125730, ENSG00000056736, ENSG00000159307, ENSG00000134259, ENSG00000128284, ENSG00000118785, ENSG00000050628, ENSG00000000971, ENSG00000196352, ENSG00000104783, ENSG00000123610                                                                                                                                                                                                                                                                                                                                                                                                        |
| GOTERM_BP_ALL | GO:0009611~response to wounding          | 16    | 10.32 | 9.05E-06 | 125        | 241      | 7505      | 3.99            | 0.0108307  | 0.0013603 | 0.014638 | ENSG00000106366, ENSG00000095752, ENSG00000196136, ENSG00000123838, ENSG00000173198, ENSG00000074181, ENSG00000048052, ENSG00000125730, ENSG00000159307, ENSG00000134259, ENSG00000128284, ENSG00000118785, ENSG00000050628, ENSG00000000971, ENSG00000196352, ENSG00000123610                                                                                                                                                                                                                                                                                                                                                                                                        |
| GOTERM_BP_ALL | GO:0009605~response to external stimulus | 19    | 12.26 | 2.07E-04 | 125        | 427      | 7505      | 2.67            | 0.2206014  | 0.0176448 | 0.334478 | ENSG00000106366, ENSG00000095752, ENSG00000196136, ENSG00000123838, ENSG00000173198, ENSG00000074181, ENSG00000180616, ENSG00000145824, ENSG00000048052, ENSG00000125730, ENSG00000113739, ENSG00000159307, ENSG00000134259, ENSG00000128284, ENSG00000118785, ENSG00000050628, ENSG00000000971, ENSG00000196352, ENSG00000123610                                                                                                                                                                                                                                                                                                                                                     |
| GOTERM_BP_ALL | GO:0002526~acute inflammatory response   | 6     | 3.87  | 8.18E-04 | 125        | 45       | 7505      | 8.01            | 0.6261696  | 0.0480071 | 1.314    | ENSG00000196136, ENSG00000123838, ENSG00000050628, ENSG00000000971, ENSG00000196352, ENSG00000125730                                                                                                                                                                                                                                                                                                                                                                                                                                                                                                                                                                                  |
| GOTERM_BP_ALL | GO:0050896~response to stimulus          | 39    | 25.16 | 0.00512  | 125        | 1547     | 7505      | 1.51            | 0.9979185  | 0.1617339 | 7.965363 | ENSG00000095752, ENSG00000091831, ENSG00000095752, ENSG00000196136, ENSG00000120149, ENSG00000205358, ENSG00000180616, ENSG00000164949, ENSG00000145824, ENSG00000077063, ENSG00000056736, ENSG00000152270, ENSG00000159307, ENSG00000118785, ENSG00000050628, ENSG00000000971, ENSG00000120875, ENSG00000196352, ENSG00000149968, ENSG00000123610, ENSG00000158270, ENSG00000145675, ENSG00000106366, ENSG00000173198, ENSG00000123838, ENSG00000074181, ENSG00000106089, ENSG00000048052, ENSG00000113739, ENSG00000125730, ENSG00000082074, ENSG00000092054, ENSG00000189056, ENSG00000134259, ENSG00000128284, ENSG00000198848, ENSG00000124731, ENSG00000104783, ENSG00000164116 |
| GOTERM_BP_ALL | GO:0006950~response to stress            | 21    | 13.55 | 0.121556 | 125        | 922      | 7505      | 1.37            | 1          | 0.7332109 | 87.70417 | ENSG00000158270, ENSG00000106366, ENSG00000095752, ENSG00000196136, ENSG00000123838, ENSG00000173198, ENSG00000074181, ENSG00000048052, ENSG00000125730, ENSG00000056736, ENSG00000092054, ENSG00000159307, ENSG00000189056, ENSG00000134259, ENSG00000128284, ENSG00000118785, ENSG00000050628, ENSG00000000971, ENSG00000196352, ENSG00000104783, ENSG00000123610                                                                                                                                                                                                                                                                                                                   |

**Annotation Cluster 3** Enrichment Score: **2.1277725963951553**

| Category      | Term                                                 | Count | %     | PValue   | List Total | Pop Hits | Pop Total | Fold Enrichment | Bonferroni | Benjamini | FDR      | Genes                                                                                                                                                                                                                                                                                                                             |
|---------------|------------------------------------------------------|-------|-------|----------|------------|----------|-----------|-----------------|------------|-----------|----------|-----------------------------------------------------------------------------------------------------------------------------------------------------------------------------------------------------------------------------------------------------------------------------------------------------------------------------------|
| GOTERM_BP_ALL | GO:0051239~regulation of multicellular organismal pr | 19    | 12.26 | 4.50E-04 | 125        | 455      | 7505      | 2.51            | 0.4181255  | 0.031351  | 0.725286 | ENSG00000111245, ENSG00000106366, ENSG00000128342, ENSG00000104332, ENSG00000107623, ENSG00000146674, ENSG00000144857, ENSG00000074181, ENSG00000180616, ENSG00000106089, ENSG00000048052, ENSG00000188064, ENSG00000165973, ENSG00000092054, ENSG00000006327, ENSG00000134363, ENSG00000134259, ENSG00000118785, ENSG00000164116 |
| GOTERM_BP_ALL | GO:0050793~regulation of developmental process       | 15    | 9.68  | 0.003596 | 125        | 377      | 7505      | 2.39            | 0.9868899  | 0.134527  | 5.66012  | ENSG00000128342, ENSG00000106366, ENSG00000104332, ENSG00000107623, ENSG00000146674, ENSG00000144857, ENSG00000074181, ENSG00000048052, ENSG00000105357, ENSG00000188064, ENSG00000165973, ENSG00000006327, ENSG00000134363, ENSG00000134259, ENSG00000118785                                                                     |
| GOTERM_BP_ALL | GO:0060284~regulation of cell development            | 7     | 4.52  | 0.009545 | 125        | 110      | 7505      | 3.82            | 0.9999903  | 0.2452892 | 14.36761 | ENSG00000006327, ENSG00000134259, ENSG00000146674, ENSG00000118785, ENSG00000144857, ENSG00000074181, ENSG00000048052                                                                                                                                                                                                             |

|               |                                                        |    |      |          |     |     |      |      |           |           |          |                                                                                                                                                                                           |
|---------------|--------------------------------------------------------|----|------|----------|-----|-----|------|------|-----------|-----------|----------|-------------------------------------------------------------------------------------------------------------------------------------------------------------------------------------------|
| GOTERM_BP_ALL | GO:0051094~positive regulation of developmental prc    | 8  | 5.16 | 0.013173 | 125 | 153 | 7505 | 3.14 | 0.9999999 | 0.2878191 | 19.30163 | ENSG00000188064, ENSG00000006327, ENSG00000134363, ENSG00000128342, ENSG00000134259, ENSG00000146674, ENSG00000144857, ENSG00000048052                                                    |
| GOTERM_BP_ALL | GO:0045595~regulation of cell differentiation          | 11 | 7.10 | 0.014304 | 125 | 272 | 7505 | 2.43 | 1         | 0.3030797 | 20.78397 | ENSG00000188064, ENSG00000165973, ENSG00000006327, ENSG00000134363, ENSG00000128342, ENSG00000134259, ENSG00000146674, ENSG00000118785, ENSG00000144857, ENSG00000074181, ENSG00000048052 |
| GOTERM_BP_ALL | GO:0045597~positive regulation of cell differentiation | 6  | 3.87 | 0.05879  | 125 | 127 | 7505 | 2.84 | 1         | 0.5979183 | 62.46213 | ENSG00000188064, ENSG00000006327, ENSG00000128342, ENSG00000134259, ENSG00000146674, ENSG00000144857                                                                                      |

Annotation Cluster 4  
Enrichment Score: 2.0142681456794795

| Category      | Term                                 | Count | %    | PValue   | List Tot | Pop H | Pop Tot | Fold | Enrichme  | Bonferroni | Benjamini | FDR                                                                                                                                                                                                        | Genes |
|---------------|--------------------------------------|-------|------|----------|----------|-------|---------|------|-----------|------------|-----------|------------------------------------------------------------------------------------------------------------------------------------------------------------------------------------------------------------|-------|
| GOTERM_BP_ALL | GO:0015698~inorganic anion transport | 5     | 3.23 | 0.004098 | 125      | 40    | 7505    | 7.51 | 0.9928416 | 0.1352186  | 6.424386  | ENSG00000077063, ENSG00000091137, ENSG00000050628, ENSG00000112280, ENSG00000169583                                                                                                                        |       |
| GOTERM_BP_ALL | GO:0006811~ion transport             | 12    | 7.74 | 0.011062 | 125      | 302   | 7505    | 2.39 | 0.9999985 | 0.2572324  | 16.46364  | ENSG00000077063, ENSG00000138449, ENSG00000162687, ENSG00000006071, ENSG00000091137, ENSG00000127954, ENSG00000173198, ENSG00000050628, ENSG00000112280, ENSG00000169583, ENSG00000104783, ENSG00000129244 |       |
| GOTERM_BP_ALL | GO:0006820~anion transport           | 5     | 3.23 | 0.019991 | 125      | 63    | 7505    | 4.77 | 1         | 0.3519608  | 27.86037  | ENSG00000077063, ENSG00000091137, ENSG00000050628, ENSG00000112280, ENSG00000169583                                                                                                                        |       |

Annotation Cluster 5  
Enrichment Score: 1.4542730044466008

| Category      | Term                                                 | Count | %    | PValue   | List Total | Pop Hits | Pop Total | Fold Enrichment | Bonferroni | Benjamini | FDR      | Genes                                                                                                                                                                                                                       |
|---------------|------------------------------------------------------|-------|------|----------|------------|----------|-----------|-----------------|------------|-----------|----------|-----------------------------------------------------------------------------------------------------------------------------------------------------------------------------------------------------------------------------|
| GOTERM_BP_ALL | GO:0002526~acute inflammatory response               | 6     | 3.87 | 8.18E-04 | 125        | 45       | 7505      | 8.01            | 0.6261696  | 0.0480071 | 1.314    | ENSG00000196136, ENSG00000123838, ENSG00000050628, ENSG00000000971, ENSG00000196352, ENSG00000125730                                                                                                                        |
| GOTERM_BP_ALL | GO:0051605~protein maturation by peptide bond cle    | 6     | 3.87 | 8.18E-04 | 125        | 45       | 7505      | 8.01            | 0.6261696  | 0.0480071 | 1.314    | ENSG00000187957, ENSG00000134259, ENSG00000123838, ENSG00000000971, ENSG00000196352, ENSG00000125730                                                                                                                        |
| GOTERM_BP_ALL | GO:0006959~humoral immune response                   | 5     | 3.23 | 0.001225 | 125        | 29       | 7505      | 10.35           | 0.7710146  | 0.0620805 | 1.962097 | ENSG00000123838, ENSG00000000971, ENSG00000124731, ENSG00000196352, ENSG00000125730                                                                                                                                         |
| GOTERM_BP_ALL | GO:0006956~complement activation                     | 4     | 2.58 | 0.002527 | 125        | 17       | 7505      | 14.13           | 0.9523687  | 0.1030218 | 4.009743 | ENSG00000123838, ENSG00000000971, ENSG00000196352, ENSG00000125730                                                                                                                                                          |
| GOTERM_BP_ALL | GO:0002541~activation of plasma proteins involved in | 4     | 2.58 | 0.002997 | 125        | 18       | 7505      | 13.34           | 0.9729543  | 0.1170534 | 4.737275 | ENSG00000123838, ENSG00000000971, ENSG00000196352, ENSG00000125730                                                                                                                                                          |
| GOTERM_BP_ALL | GO:0016485~protein processing                        | 6     | 3.87 | 0.003715 | 125        | 63       | 7505      | 5.72            | 0.988631   | 0.1344715 | 5.840652 | ENSG00000187957, ENSG00000134259, ENSG00000123838, ENSG00000000971, ENSG00000196352, ENSG00000125730                                                                                                                        |
| GOTERM_BP_ALL | GO:0051604~protein maturation                        | 6     | 3.87 | 0.006574 | 125        | 72       | 7505      | 5.00            | 0.9996421  | 0.1884584 | 10.11784 | ENSG00000187957, ENSG00000134259, ENSG00000123838, ENSG00000000971, ENSG00000196352, ENSG00000125730                                                                                                                        |
| GOTERM_BP_ALL | GO:0045087~innate immune response                    | 5     | 3.23 | 0.017958 | 125        | 61       | 7505      | 4.92            | 1          | 0.3424481 | 25.4018  | ENSG00000158270, ENSG00000123838, ENSG00000000971, ENSG00000196352, ENSG00000125730                                                                                                                                         |
| GOTERM_BP_ALL | GO:0006955~immune response                           | 10    | 6.45 | 0.018482 | 125        | 242      | 7505      | 2.48            | 1          | 0.3451999 | 26.04234 | ENSG00000158270, ENSG00000082074, ENSG00000128342, ENSG00000123838, ENSG00000000971, ENSG00000164949, ENSG00000124731, ENSG00000196352, ENSG00000145824, ENSG00000125730                                                    |
| GOTERM_BP_ALL | GO:0006958~complement activation, classical pathwa   | 3     | 1.94 | 0.021643 | 125        | 14       | 7505      | 12.87           | 1          | 0.3599128 | 29.80225 | ENSG00000123838, ENSG00000196352, ENSG00000125730                                                                                                                                                                           |
| GOTERM_BP_ALL | GO:0002455~humoral immune response mediated by       | 3     | 1.94 | 0.024707 | 125        | 15       | 7505      | 12.01           | 1          | 0.394433  | 33.27343 | ENSG00000123838, ENSG00000196352, ENSG00000125730                                                                                                                                                                           |
| GOTERM_BP_ALL | GO:0002253~activation of immune response             | 4     | 2.58 | 0.037775 | 125        | 45       | 7505      | 5.34            | 1          | 0.4991288 | 46.3521  | ENSG00000123838, ENSG00000000971, ENSG00000196352, ENSG00000125730                                                                                                                                                          |
| GOTERM_BP_ALL | GO:0002376~immune system process                     | 13    | 8.39 | 0.046964 | 125        | 424      | 7505      | 1.84            | 1          | 0.542504  | 54.06285 | ENSG00000158270, ENSG00000082074, ENSG00000145675, ENSG00000128342, ENSG00000095752, ENSG00000123838, ENSG00000000971, ENSG00000164949, ENSG00000124731, ENSG00000196352, ENSG00000145824, ENSG00000048052, ENSG00000125730 |
| GOTERM_BP_ALL | GO:0050778~positive regulation of immune response    | 4     | 2.58 | 0.082527 | 125        | 62       | 7505      | 3.87            | 1          | 0.6601819 | 75.16473 | ENSG00000123838, ENSG00000000971, ENSG00000196352, ENSG00000125730                                                                                                                                                          |
| GOTERM_BP_ALL | GO:0016064~immunoglobulin mediated immune resp       | 3     | 1.94 | 0.092338 | 125        | 31       | 7505      | 5.81            | 1          | 0.6774698 | 79.12811 | ENSG00000123838, ENSG00000196352, ENSG00000125730                                                                                                                                                                           |
| GOTERM_BP_ALL | GO:0019724~B cell mediated immunity                  | 3     | 1.94 | 0.092338 | 125        | 31       | 7505      | 5.81            | 1          | 0.6774698 | 79.12811 | ENSG00000123838, ENSG00000196352, ENSG00000125730                                                                                                                                                                           |
| GOTERM_BP_ALL | GO:0002252~immune effector process                   | 4     | 2.58 | 0.102021 | 125        | 68       | 7505      | 3.53            | 1          | 0.7017546 | 82.45163 | ENSG00000123838, ENSG00000000971, ENSG00000196352, ENSG00000125730                                                                                                                                                          |
| GOTERM_BP_ALL | GO:0002449~lymphocyte mediated immunity              | 3     | 1.94 | 0.146731 | 125        | 41       | 7505      | 4.39            | 1          | 0.7775585 | 92.3168  | ENSG00000123838, ENSG00000196352, ENSG00000125730                                                                                                                                                                           |
| GOTERM_BP_ALL | GO:0048583~regulation of response to stimulus        | 7     | 4.52 | 0.163248 | 125        | 223      | 7505      | 1.88            | 1          | 0.7957091 | 94.39915 | ENSG00000166923, ENSG00000106366, ENSG00000123838, ENSG00000118785, ENSG00000000971, ENSG00000196352, ENSG00000125730                                                                                                       |
| GOTERM_BP_ALL | GO:0002250~adaptive immune response                  | 3     | 1.94 | 0.16412  | 125        | 44       | 7505      | 4.09            | 1          | 0.7952067 | 94.49279 | ENSG00000123838, ENSG00000196352, ENSG00000125730                                                                                                                                                                           |
| GOTERM_BP_ALL | GO:0002460~adaptive immune response based on sor     | 3     | 1.94 | 0.16412  | 125        | 44       | 7505      | 4.09            | 1          | 0.7952067 | 94.49279 | ENSG00000123838, ENSG00000196352, ENSG00000125730                                                                                                                                                                           |
| GOTERM_BP_ALL | GO:0002443~leukocyte mediated immunity               | 3     | 1.94 | 0.175909 | 125        | 46       | 7505      | 3.92            | 1          | 0.808085  | 95.62298 | ENSG00000123838, ENSG00000196352, ENSG00000125730                                                                                                                                                                           |
| GOTERM_BP_ALL | GO:0002682~regulation of immune system process       | 6     | 3.87 | 0.185226 | 125        | 183      | 7505      | 1.97            | 1          | 0.8129496 | 96.35815 | ENSG00000166923, ENSG00000128342, ENSG00000123838, ENSG00000000971, ENSG00000196352, ENSG00000125730                                                                                                                        |
| GOTERM_BP_ALL | GO:0050776~regulation of immune response             | 4     | 2.58 | 0.228806 | 125        | 100      | 7505      | 2.40            | 1          | 0.8599518 | 98.50291 | ENSG00000123838, ENSG00000000971, ENSG00000196352, ENSG00000125730                                                                                                                                                          |
| GOTERM_BP_ALL | GO:0002684~positive regulation of immune system pr   | 4     | 2.58 | 0.255321 | 125        | 106      | 7505      | 2.27            | 1          | 0.881924  | 99.1498  | ENSG00000123838, ENSG00000000971, ENSG00000196352, ENSG00000125730                                                                                                                                                          |
| GOTERM_BP_ALL | GO:0048584~positive regulation of response to stimul | 4     | 2.58 | 0.273237 | 125        | 110      | 7505      | 2.18            | 1          | 0.8954919 | 99.42656 | ENSG00000123838, ENSG00000000971, ENSG00000196352, ENSG00000125730                                                                                                                                                          |
| GOTERM_BP_ALL | GO:0006508~proteolysis                               | 12    | 7.74 | 0.472707 | 125        | 631      | 7505      | 1.14            | 1          | 0.9761858 | 99.9968  | ENSG00000187957, ENSG00000114737, ENSG00000166033, ENSG00000134259, ENSG00000182752, ENSG00000138316, ENSG00000123838, ENSG00000000971, ENSG00000196352, ENSG00000125730, ENSG00000149968, ENSG00000077274                  |

Annotation Cluster 6  
Enrichment Score: 1.4501933083743366

| Category      | Term                                                   | Count | %    | PValue   | List Total | Pop Hits | Pop Total | Fold Enrichment | Bonferroni | Benjamini | FDR      | Genes                                                                                                                                  |
|---------------|--------------------------------------------------------|-------|------|----------|------------|----------|-----------|-----------------|------------|-----------|----------|----------------------------------------------------------------------------------------------------------------------------------------|
| GOTERM_BP_ALL | GO:0060284~regulation of cell development              | 7     | 4.52 | 0.009545 | 125        | 110      | 7505      | 3.82            | 0.9999903  | 0.2452892 | 14.36761 | ENSG00000006327, ENSG00000134259, ENSG00000146674, ENSG00000118785, ENSG00000144857, ENSG00000074181, ENSG00000048052                  |
| GOTERM_BP_ALL | GO:0051094~positive regulation of developmental prc    | 8     | 5.16 | 0.013173 | 125        | 153      | 7505      | 3.14            | 0.9999999  | 0.2878191 | 19.30163 | ENSG00000188064, ENSG00000006327, ENSG00000134363, ENSG00000128342, ENSG00000134259, ENSG00000146674, ENSG00000144857, ENSG00000048052 |
| GOTERM_BP_ALL | GO:0048742~regulation of skeletal muscle fiber devel   | 3     | 1.94 | 0.031323 | 125        | 17       | 7505      | 10.60           | 1          | 0.4553905 | 40.2289  | ENSG00000146674, ENSG00000144857, ENSG00000048052                                                                                      |
| GOTERM_BP_ALL | GO:0051153~regulation of striated muscle cell differer | 3     | 1.94 | 0.034864 | 125        | 18       | 7505      | 10.01           | 1          | 0.4867669 | 43.66581 | ENSG00000146674, ENSG00000144857, ENSG00000048052                                                                                      |

|               |                                                      |   |      |          |     |    |      |      |   |           |          |                                                   |
|---------------|------------------------------------------------------|---|------|----------|-----|----|------|------|---|-----------|----------|---------------------------------------------------|
| GOTERM_BP_ALL | GO:0048641~regulation of skeletal muscle tissue deve | 3 | 1.94 | 0.042381 | 125 | 20 | 7505 | 9.01 | 1 | 0.5299992 | 50.35749 | ENSG00000146674, ENSG00000144857, ENSG00000048052 |
| GOTERM_BP_ALL | GO:0051147~regulation of muscle cell differentiation | 3 | 1.94 | 0.050442 | 125 | 22 | 7505 | 8.19 | 1 | 0.5640426 | 56.70044 | ENSG00000146674, ENSG00000144857, ENSG00000048052 |
| GOTERM_BP_ALL | GO:0048634~regulation of muscle development          | 3 | 1.94 | 0.092338 | 125 | 31 | 7505 | 5.81 | 1 | 0.6774698 | 79.12811 | ENSG00000146674, ENSG00000144857, ENSG00000048052 |
| GOTERM_BP_ALL | GO:0016202~regulation of striated muscle tissue deve | 3 | 1.94 | 0.092338 | 125 | 31 | 7505 | 5.81 | 1 | 0.6774698 | 79.12811 | ENSG00000146674, ENSG00000144857, ENSG00000048052 |

**Annotation Cluster 7** **Enrichment Score: 1.4149409296845732**

| Category      | Term                                                  | Count | %    | PValue   | List Total | Pop Hits | Pop Total | Fold Enrichment | Bonferroni | Benjamini | FDR      | Genes                                                                                                                                                                                                                       |
|---------------|-------------------------------------------------------|-------|------|----------|------------|----------|-----------|-----------------|------------|-----------|----------|-----------------------------------------------------------------------------------------------------------------------------------------------------------------------------------------------------------------------------|
| GOTERM_BP_ALL | GO:0046883~regulation of hormone secretion            | 5     | 3.23 | 6.86E-04 | 125        | 25       | 7505      | 12.01           | 0.5621919  | 0.0448506 | 1.104201 | ENSG00000134363, ENSG00000152270, ENSG00000128342, ENSG00000095752, ENSG00000106089                                                                                                                                         |
| GOTERM_BP_ALL | GO:0051046~regulation of secretion                    | 7     | 4.52 | 9.96E-04 | 125        | 70       | 7505      | 6.00            | 0.698579   | 0.0530521 | 1.5992   | ENSG00000134363, ENSG00000152270, ENSG00000128342, ENSG00000095752, ENSG00000134259, ENSG00000106089, ENSG00000104783                                                                                                       |
| GOTERM_BP_ALL | GO:0032879~regulation of localization                 | 13    | 8.39 | 0.005154 | 125        | 311      | 7505      | 2.51            | 0.9980039  | 0.1585946 | 8.01713  | ENSG00000166923, ENSG00000134363, ENSG00000152270, ENSG00000091137, ENSG00000145675, ENSG00000128342, ENSG00000095752, ENSG00000134259, ENSG00000146674, ENSG00000106089, ENSG00000048052, ENSG00000104783, ENSG00000125730 |
| GOTERM_BP_ALL | GO:0046888~negative regulation of hormone secretio    | 3     | 1.94 | 0.005386 | 125        | 7        | 7505      | 25.73           | 0.9984925  | 0.161049  | 8.363647 | ENSG00000134363, ENSG00000128342, ENSG00000095752                                                                                                                                                                           |
| GOTERM_BP_ALL | GO:0060341~regulation of cellular localization        | 7     | 4.52 | 0.008017 | 125        | 106      | 7505      | 3.96            | 0.9999377  | 0.2150151 | 12.20585 | ENSG00000134363, ENSG00000152270, ENSG00000128342, ENSG00000095752, ENSG00000134259, ENSG00000106089, ENSG00000104783                                                                                                       |
| GOTERM_BP_ALL | GO:0051049~regulation of transport                    | 9     | 5.81 | 0.017472 | 125        | 200      | 7505      | 2.70            | 1          | 0.3401682 | 24.80198 | ENSG00000134363, ENSG00000152270, ENSG00000145675, ENSG00000128342, ENSG00000095752, ENSG00000134259, ENSG00000106089, ENSG00000104783, ENSG00000125730                                                                     |
| GOTERM_BP_ALL | GO:0051048~negative regulation of secretion           | 3     | 1.94 | 0.021643 | 125        | 14       | 7505      | 12.87           | 1          | 0.3599128 | 29.80225 | ENSG00000134363, ENSG00000128342, ENSG00000095752                                                                                                                                                                           |
| GOTERM_BP_ALL | GO:0051051~negative regulation of transport           | 3     | 1.94 | 0.279439 | 125        | 63       | 7505      | 2.86            | 1          | 0.8976057 | 99.50078 | ENSG00000134363, ENSG00000128342, ENSG00000095752                                                                                                                                                                           |
| GOTERM_BP_ALL | GO:0008284~positive regulation of cell proliferation  | 4     | 2.58 | 0.746038 | 125        | 233      | 7505      | 1.03            | 1          | 0.9988052 | 100      | ENSG00000128342, ENSG00000095752, ENSG00000134259, ENSG00000122756                                                                                                                                                          |
| GOTERM_BP_ALL | GO:0006357~regulation of transcription from RNA pol 6 | 6     | 3.87 | 0.879122 | 125        | 455      | 7505      | 0.79            | 1          | 0.999924  | 100      | ENSG00000134363, ENSG00000128342, ENSG00000095752, ENSG00000052850, ENSG00000176887, ENSG00000048052                                                                                                                        |
| GOTERM_BP_ALL | GO:0006355~regulation of transcription, DNA-depend    | 8     | 5.16 | 0.996652 | 125        | 940      | 7505      | 0.51            | 1          | 1         | 100      | ENSG00000134363, ENSG00000128342, ENSG00000091831, ENSG00000095752, ENSG00000120149, ENSG00000052850, ENSG00000176887, ENSG00000048052                                                                                      |
| GOTERM_BP_ALL | GO:0051252~regulation of RNA metabolic process        | 8     | 5.16 | 0.997572 | 125        | 966      | 7505      | 0.50            | 1          | 1         | 100      | ENSG00000134363, ENSG00000128342, ENSG00000091831, ENSG00000095752, ENSG00000120149, ENSG00000052850, ENSG00000176887, ENSG00000048052                                                                                      |

**Annotation Cluster 8** **Enrichment Score: 1.3615089826009084**

| Category      | Term                                               | Count | %     | PValue   | List Total | Pop Hits | Pop Total | Fold Enrichment | Bonferroni | Benjamini | FDR      | Genes                                                                                                                                                                                                                                                                                                                                                                                                |
|---------------|----------------------------------------------------|-------|-------|----------|------------|----------|-----------|-----------------|------------|-----------|----------|------------------------------------------------------------------------------------------------------------------------------------------------------------------------------------------------------------------------------------------------------------------------------------------------------------------------------------------------------------------------------------------------------|
| GOTERM_BP_ALL | GO:0007399~nervous system development              | 23    | 14.84 | 5.91E-05 | 125        | 538      | 7505      | 2.57            | 0.0686225  | 0.0064419 | 0.09552  | ENSG00000102466, ENSG00000151150, ENSG00000187957, ENSG00000128342, ENSG00000168546, ENSG00000172348, ENSG00000153902, ENSG00000066382, ENSG00000176887, ENSG00000074181, ENSG00000122756, ENSG00000077063, ENSG00000166923, ENSG00000165973, ENSG00000179542, ENSG0000006327, ENSG00000182580, ENSG00000107984, ENSG00000189056, ENSG00000134259, ENSG00000133083, ENSG00000150938, ENSG00000118785 |
| GOTERM_BP_ALL | GO:0022008~neurogenesis                            | 14    | 9.03  | 0.001263 | 125        | 299      | 7505      | 2.81            | 0.7813176  | 0.0613747 | 2.022751 | ENSG00000151150, ENSG00000187957, ENSG00000128342, ENSG00000153902, ENSG00000176887, ENSG00000074181, ENSG00000077063, ENSG0000006327, ENSG00000182580, ENSG00000179542, ENSG00000189056, ENSG00000134259, ENSG00000133083, ENSG00000118785                                                                                                                                                          |
| GOTERM_BP_ALL | GO:0048699~generation of neurons                   | 13    | 8.39  | 0.001777 | 125        | 273      | 7505      | 2.86            | 0.8822809  | 0.0820186 | 2.835064 | ENSG00000151150, ENSG00000187957, ENSG00000128342, ENSG00000153902, ENSG00000074181, ENSG00000077063, ENSG00000179542, ENSG0000006327, ENSG00000182580, ENSG00000189056, ENSG00000134259, ENSG00000133083, ENSG00000118785                                                                                                                                                                           |
| GOTERM_BP_ALL | GO:0030182~neuron differentiation                  | 9     | 5.81  | 0.019445 | 125        | 204      | 7505      | 2.65            | 1          | 0.3543314 | 27.20798 | ENSG00000182580, ENSG00000179542, ENSG00000151150, ENSG00000128342, ENSG00000189056, ENSG00000134259, ENSG00000133083, ENSG00000153902, ENSG00000074181                                                                                                                                                                                                                                              |
| GOTERM_BP_ALL | GO:0048666~neuron development                      | 8     | 5.16  | 0.0198   | 125        | 166      | 7505      | 2.89            | 1          | 0.3543031 | 27.63246 | ENSG00000182580, ENSG00000179542, ENSG00000151150, ENSG00000128342, ENSG00000189056, ENSG00000134259, ENSG00000133083, ENSG00000153902                                                                                                                                                                                                                                                               |
| GOTERM_BP_ALL | GO:0048468~cell development                        | 11    | 7.10  | 0.037182 | 125        | 318      | 7505      | 2.08            | 1          | 0.4987464 | 45.81447 | ENSG00000182580, ENSG00000179542, ENSG00000111245, ENSG00000187957, ENSG00000151150, ENSG00000128342, ENSG00000189056, ENSG00000134259, ENSG00000133083, ENSG00000153902, ENSG00000176887                                                                                                                                                                                                            |
| GOTERM_BP_ALL | GO:0031175~neuron projection development           | 6     | 3.87  | 0.065403 | 125        | 131      | 7505      | 2.75            | 1          | 0.6204236 | 66.50761 | ENSG00000182580, ENSG00000179542, ENSG00000151150, ENSG00000189056, ENSG00000134259, ENSG00000133083                                                                                                                                                                                                                                                                                                 |
| GOTERM_BP_ALL | GO:0007409~axonogenesis                            | 5     | 3.23  | 0.074061 | 125        | 96       | 7505      | 3.13            | 1          | 0.6384014 | 71.18753 | ENSG00000182580, ENSG00000179542, ENSG00000151150, ENSG00000189056, ENSG00000133083                                                                                                                                                                                                                                                                                                                  |
| GOTERM_BP_ALL | GO:0048667~cell morphogenesis involved in neuron d | 5     | 3.23  | 0.085618 | 125        | 101      | 7505      | 2.97            | 1          | 0.6593043 | 76.48369 | ENSG00000182580, ENSG00000179542, ENSG00000151150, ENSG00000189056, ENSG00000133083                                                                                                                                                                                                                                                                                                                  |
| GOTERM_BP_ALL | GO:0048812~neuron projection morphogenesis         | 5     | 3.23  | 0.105813 | 125        | 109      | 7505      | 2.75            | 1          | 0.7056919 | 83.6125  | ENSG00000182580, ENSG00000179542, ENSG00000151150, ENSG00000189056, ENSG00000133083                                                                                                                                                                                                                                                                                                                  |
| GOTERM_BP_ALL | GO:0006928~cell motion                             | 8     | 5.16  | 0.128727 | 125        | 255      | 7505      | 1.88            | 1          | 0.7487842 | 89.23056 | ENSG00000077063, ENSG00000182580, ENSG0000006327, ENSG00000196754, ENSG00000187957, ENSG00000151150, ENSG00000189056, ENSG00000133083                                                                                                                                                                                                                                                                |
