# Supplementary material for: Annotating Transcriptional Effects of Genetic Variants in Disease‐Relevant Tissue: Transcriptome‐Wide Allelic Imbalance in Osteoarthritic Cartilage
Source: PubMed Central journal article supplement — Arthritis Rheumatol. 2019 Feb 23;71(4):561–70. doi: 10.1002/art.40748 (PMC6593438; doi:10.1002/art.40748), 2019-02-23
Supplement: ART-71-561-s008.pdf [file ART-71-561-s008.pdf]

| Supplementary Table S7: Intersection of AI SNPs FDR05 with mJSW SNPs with P05 |                        |                  |                  |            |             |             |                               |                               |            |          |
|-------------------------------------------------------------------------------|------------------------|------------------|------------------|------------|-------------|-------------|-------------------------------|-------------------------------|------------|----------|
| SNP                                                                           | wholeGeneSy<br>mbol_AI | Allele1_<br>mJSW | Allele2_<br>mJSW | Freq1_mJSW | Effect_mJSW | Pvalue_mJSW | Observed<br>RefAlleles<br>_AI | Observed<br>AltAlleles<br>_AI | metaPhi_AI | FDR_AI   |
| rs17666900                                                                    | ADAMTS2                | a                | c                | 0.14       | -0.06       | 4.22E-03    | C                             | A                             | 0.624      | 1.30E-04 |
| rs4869                                                                        | ADIRF                  | t                | c                | 0.45       | 0.04        | 4.48E-03    | T                             | C                             | 0.518      | 7.46E-04 |
| rs3204689                                                                     | ALDH1A2                | c                | g                | 0.45       | -0.05       | 2.74E-04    | G                             | C                             | 0.418      | 2.27E-03 |
| rs9325                                                                        | ALDH1A2                | a                | t                | 0.45       | -0.05       | 3.48E-04    | T                             | A                             | 0.426      | 9.77E-06 |
| rs1063666                                                                     | ALDH1A2                | a                | c                | 0.46       | 0.03        | 4.32E-02    | A                             | C                             | 0.386      | 6.03E-06 |
| rs3204690                                                                     | ALDH1A2                | t                | g                | 0.46       | 0.03        | 4.33E-02    | T                             | G                             | 0.432      | 3.95E-02 |
| rs4646642                                                                     | ALDH1A2                | a                | g                | 0.46       | 0.03        | 4.39E-02    | A                             | G                             | 0.431      | 3.49E-02 |
| rs1060814                                                                     | ATHL1                  | a                | c                | 0.37       | 0.04        | 2.94E-02    | A                             | C                             | 0.576      | 5.05E-03 |
| rs4655                                                                        | ATP5C1                 | t                | c                | 0.64       | -0.03       | 3.10E-02    | T                             | C                             | 0.449      | 3.84E-03 |
| rs1044104                                                                     | BMP6                   | a                | g                | 0.73       | -0.04       | 5.18E-03    | A                             | G                             | 0.562      | 1.82E-03 |
| rs840385                                                                      | C1QTNF3                | t                | c                | 0.60       | 0.03        | 1.68E-02    | T                             | C                             | 0.435      | 3.61E-02 |
| rs6546                                                                        | C1QTNF3                | c                | g                | 0.64       | 0.03        | 3.71E-02    | C                             | G                             | 0.386      | 4.80E-13 |
| rs1254                                                                        | C9orf123               | t                | c                | 0.98       | 0.27        | 1.93E-03    | C                             | T                             | 0.379      | 1.06E-02 |
| rs4742410                                                                     | C9orf123               | c                | g                | 0.98       | 0.18        | 1.07E-02    | G                             | C                             | 0.305      | 8.73E-08 |
| rs3829078                                                                     | CA9                    | a                | g                | 0.89       | -0.04       | 4.95E-02    | A                             | G                             | 0.586      | 2.45E-14 |
| rs11082                                                                       | CHPT1                  | t                | c                | 0.52       | 0.03        | 8.35E-03    | C                             | T                             | 0.442      | 1.14E-02 |
| rs9659030                                                                     | COL11A1                | t                | c                | 0.79       | 0.04        | 3.98E-03    | T                             | C                             | 0.653      | 0.00E+00 |
| rs1053093                                                                     | COLGALT2               | t                | c                | 0.27       | -0.03       | 2.48E-02    | C                             | T                             | 0.554      | 5.11E-08 |
| rs1053092                                                                     | COLGALT2               | c                | g                | 0.27       | -0.03       | 2.81E-02    | G                             | C                             | 0.531      | 6.05E-04 |
| rs11724788                                                                    | CYTL1                  | a                | g                | 0.75       | -0.04       | 1.53E-02    | G                             | A                             | 0.376      | 1.73E-07 |
| rs3819185                                                                     | DDIT4L                 | t                | g                | 0.21       | 0.03        | 3.39E-02    | G                             | T                             | 0.448      | 1.39E-02 |
| rs640120                                                                      | DDX6                   | a                | c                | 0.12       | -0.04       | 3.56E-02    | A                             | C                             | 0.432      | 4.78E-02 |
| rs1052591                                                                     | DPT                    | t                | c                | 0.53       | 0.03        | 2.56E-02    | C                             | T                             | 0.522      | 1.15E-03 |
| rs9614                                                                        | FBXO2                  | t                | g                | 0.81       | 0.04        | 1.34E-02    | T                             | G                             | 0.448      | 2.01E-03 |
| rs16823799                                                                    | FRZB                   | a                | g                | 0.09       | -0.05       | 2.10E-02    | G                             | A                             | 0.591      | 1.37E-02 |
| rs7775                                                                        | FRZB                   | c                | g                | 0.09       | -0.06       | 2.11E-02    | G                             | C                             | 0.481      | 1.08E-02 |
| rs7770                                                                        | GDI2                   | t                | c                | 0.86       | 0.04        | 4.53E-02    | T                             | C                             | 0.548      | 5.54E-04 |
| rs2250208                                                                     | GEM                    | t                | c                | 0.42       | -0.03       | 4.97E-02    | T                             | C                             | 0.614      | 3.82E-05 |
| rs15129                                                                       | HDLBP                  | t                | c                | 0.80       | 0.04        | 6.62E-03    | T                             | C                             | 0.463      | 3.27E-06 |
| rs1064767                                                                     | HDLBP                  | t                | c                | 0.80       | 0.04        | 6.89E-03    | T                             | C                             | 0.438      | 1.27E-02 |
| rs11556045                                                                    | HEXB                   | a                | g                | 0.83       | -0.05       | 2.71E-03    | A                             | G                             | 0.462      | 3.16E-02 |
| rs11555762                                                                    | HSD17B12               | a                | g                | 0.30       | -0.12       | 4.93E-02    | C                             | T                             | 0.345      | 2.20E-06 |
| rs7645                                                                        | HSP90B1                | t                | c                | 0.30       | -0.04       | 4.21E-02    | C                             | T                             | 0.509      | 9.36E-04 |
| rs13144371                                                                    | IBSP                   | a                | g                | 0.24       | 0.03        | 3.40E-02    | A                             | G                             | 0.440      | 0.00E+00 |
| rs1287600                                                                     | MARCH6                 | t                | c                | 0.11       | 0.04        | 3.24E-02    | C                             | T                             | 0.572      | 4.17E-02 |
| rs2248014                                                                     | MATN2                  | t                | c                | 0.26       | -0.05       | 1.30E-03    | T                             | C                             | 0.575      | 2.90E-05 |
| rs1869609                                                                     | MATN2                  | a                | g                | 0.35       | -0.03       | 1.97E-02    | A                             | G                             | 0.575      | 1.66E-07 |
| rs4236                                                                        | MGP                    | t                | c                | 0.61       | -0.03       | 4.33E-02    | T                             | C                             | 0.978      | 0.00E+00 |
| rs1049897                                                                     | MGP                    | a                | t                | 0.39       | 0.03        | 4.43E-02    | T                             | A                             | 0.450      | 2.69E-09 |
| rs1063984                                                                     | MRTO4                  | a                | g                | 0.74       | 0.03        | 3.66E-02    | A                             | G                             | 0.333      | 6.77E-03 |
| rs17554211                                                                    | PCOLCE2                | t                | g                | 0.12       | -0.05       | 1.59E-02    | G                             | T                             | 0.458      | 1.25E-11 |
| rs11251721                                                                    | PFKP                   | t                | c                | 0.21       | -0.04       | 1.64E-02    | C                             | T                             | 0.527      | 1.22E-02 |
| rs11133                                                                       | PHYH                   | t                | c                | 0.26       | -0.03       | 1.41E-02    | C                             | T                             | 0.560      | 4.21E-02 |
| rs1043526                                                                     | PIK3R1                 | a                | g                | 0.86       | -0.04       | 4.82E-02    | A                             | G                             | 0.358      | 2.56E-06 |
| rs11677                                                                       | PLA2G2A                | a                | g                | 0.11       | -0.05       | 9.13E-03    | G                             | A                             | 0.009      | 0.00E+00 |
| rs6558405                                                                     | PLEC                   | t                | c                | 0.58       | 0.03        | 1.95E-02    | T                             | C                             | 0.465      | 2.16E-02 |
| rs7819099                                                                     | PLEC                   | a                | g                | 0.59       | 0.03        | 2.04E-02    | A                             | G                             | 0.437      | 1.77E-03 |
| rs3190                                                                        | PPP1CB                 | a                | g                | 0.43       | -0.03       | 7.63E-03    | A                             | G                             | 0.589      | 6.34E-10 |
| rs1051638                                                                     | SLC39A14               | a                | g                | 0.38       | 0.03        | 1.08E-02    | G                             | A                             | 0.478      | 1.75E-02 |
| rs1051708                                                                     | SLC39A14               | a                | c                | 0.62       | -0.03       | 1.37E-02    | A                             | C                             | 0.474      | 1.85E-06 |
| rs7674108                                                                     | SORBS2                 | a                | g                | 0.88       | 0.06        | 1.91E-03    | G                             | A                             | 0.658      | 2.90E-02 |
| rs3549                                                                        | SPARC                  | c                | g                | 0.53       | 0.03        | 2.77E-02    | G                             | C                             | 0.451      | 0.00E+00 |
| rs1059829                                                                     | SPARC                  | a                | g                | 0.53       | 0.03        | 2.84E-02    | G                             | A                             | 0.450      | 0.00E+00 |
| rs3210714                                                                     | SPARC                  | t                | c                | 0.53       | 0.03        | 2.85E-02    | C                             | T                             | 0.437      | 0.00E+00 |
| rs1054204                                                                     | SPARC                  | c                | g                | 0.47       | -0.03       | 3.26E-02    | C                             | G                             | 0.513      | 0.00E+00 |
| rs4935                                                                        | SQSTM1                 | t                | c                | 0.54       | -0.03       | 1.82E-02    | C                             | T                             | 0.469      | 2.63E-04 |
| rs3742771                                                                     | TMED10                 | a                | g                | 0.53       | -0.04       | 5.04E-03    | A                             | G                             | 0.538      | 1.48E-02 |
| rs4614                                                                        | VPS11                  | a                | g                | 0.60       | -0.03       | 4.24E-02    | A                             | G                             | 0.414      | 2.21E-02 |
| rs2270841                                                                     | WWP2                   | t                | c                | 0.27       | 0.04        | 2.61E-03    | T                             | C                             | 0.568      | 2.20E-16 |

| SNP       | wholeGeneSymbol_AI | Allele1_mJSW | Allele2_mJSW | Freq1_mJSW | Effect_mJSW | Pvalue_mJSW | Observed RefAlleles_AI | Observed AltAlleles_AI | metaPhi_AI | FDR_AI   |
|-----------|--------------------|--------------|--------------|------------|-------------|-------------|------------------------|------------------------|------------|----------|
| rs1566452 | WWP2               | a            | g            | 0.73       | -0.04       | 2.83E-03    | G                      | A                      | 0.549      | 1.54E-07 |
| rs1983016 | WWP2               | a            | g            | 0.28       | 0.04        | 3.20E-03    | A                      | G                      | 0.557      | 0.00E+00 |
| rs1052429 | WWP2               | a            | g            | 0.72       | -0.04       | 4.66E-03    | G                      | A                      | 0.562      | 0.00E+00 |
| rs3748388 | WWP2               | a            | c            | 0.70       | -0.05       | 5.65E-03    | C                      | A                      | 0.546      | 1.00E-17 |
