# Supplementary material for: Annotating Transcriptional Effects of Genetic Variants in Disease‐Relevant Tissue: Transcriptome‐Wide Allelic Imbalance in Osteoarthritic Cartilage
Source: PubMed Central journal article supplement — Arthritis Rheumatol. 2019 Feb 23;71(4):561–70. doi: 10.1002/art.40748 (PMC6593438; doi:10.1002/art.40748), 2019-02-23
Supplement: ART-71-561-s009.pdf [file ART-71-561-s009.pdf]

| Supplementary Table S8: Intersection of AI SNPs FDR05 with HipOA SNPs with P05 |                      |             |             |           |            |            |                         |                         |            |          |
|--------------------------------------------------------------------------------|----------------------|-------------|-------------|-----------|------------|------------|-------------------------|-------------------------|------------|----------|
| SNP                                                                            | whole Gene Symbol AI | Allele1 hip | Allele2 hip | Freq1 hip | Effect hip | Pvalue hip | Observed Ref Alleles AI | Observed Alt Alleles AI | metaPhi AI | FDR AI   |
| rs1126823                                                                      | ACAN                 | a           | g           | 0.76      | 0.13       | 2.51E-03   | A                       | G                       | 0.489      | 1.06E-05 |
| rs2280465                                                                      | ACAN                 | a           | g           | 0.22      | -0.09      | 2.82E-03   | G                       | A                       | 0.364      | 5.13E-03 |
| rs3210458                                                                      | ACPL2                | t           | c           | 0.08      | -0.13      | 4.33E-03   | C                       | T                       | 0.419      | 1.65E-02 |
| rs1378602                                                                      | ALKBH5               | a           | g           | 0.63      | 0.09       | 2.78E-04   | G                       | A                       | 0.588      | 1.06E-06 |
| rs9174                                                                         | ANAPC4               | t           | c           | 0.42      | 0.06       | 1.90E-02   | T                       | C                       | 0.432      | 9.35E-04 |
| rs1054707                                                                      | BDH2                 | t           | c           | 0.84      | 0.08       | 2.35E-02   | T                       | C                       | 0.612      | 3.33E-05 |
| rs3087835                                                                      | C12orf57             | a           | g           | 0.71      | 0.06       | 2.69E-02   | A                       | G                       | 0.570      | 2.37E-02 |
| rs1044189                                                                      | C12orf57             | a           | c           | 0.71      | 0.06       | 2.77E-02   | A                       | C                       | 0.601      | 1.76E-03 |
| rs1056425                                                                      | C1orf123             | a           | g           | 0.34      | -0.07      | 1.08E-02   | G                       | A                       | 0.449      | 2.17E-02 |
| rs12418                                                                        | CHST3                | a           | g           | 0.50      | 0.07       | 5.89E-03   | G                       | A                       | 0.442      | 2.53E-12 |
| rs730720                                                                       | CHST3                | t           | c           | 0.50      | 0.07       | 7.97E-03   | C                       | T                       | 0.437      | 3.70E-11 |
| rs731027                                                                       | CHST3                | t           | c           | 0.50      | -0.06      | 8.71E-03   | T                       | C                       | 0.460      | 1.15E-04 |
| rs4148949                                                                      | CHST3                | t           | c           | 0.37      | -0.07      | 1.09E-02   | T                       | C                       | 0.449      | 2.98E-02 |
| rs4148946                                                                      | CHST3                | t           | c           | 0.63      | 0.07       | 1.11E-02   | C                       | T                       | 0.453      | 1.25E-02 |
| rs2229783                                                                      | COL11A1              | a           | g           | 0.39      | -0.08      | 2.60E-03   | A                       | G                       | 0.528      | 6.54E-07 |
| rs7499                                                                         | COL18A1              | a           | g           | 0.40      | -0.05      | 3.32E-02   | G                       | A                       | 0.630      | 1.95E-11 |
| rs2276454                                                                      | COL2A1               | a           | g           | 0.38      | -0.08      | 1.99E-03   | G                       | A                       | 0.491      | 1.14E-03 |
| rs1635553                                                                      | COL2A1               | a           | g           | 0.54      | 0.06       | 1.61E-02   | A                       | G                       | 0.512      | 0.00E+00 |
| rs3088026                                                                      | COL6A2               | t           | c           | 0.09      | -0.12      | 5.54E-03   | C                       | T                       | 0.532      | 5.46E-03 |
| rs2646108                                                                      | CRISPLD2             | a           | g           | 0.19      | 0.09       | 5.29E-03   | G                       | A                       | 0.625      | 2.62E-09 |
| rs4783099                                                                      | CRISPLD2             | t           | c           | 0.38      | -0.06      | 3.06E-02   | C                       | T                       | 0.441      | 5.41E-03 |
| rs2641670                                                                      | CRISPLD2             | a           | g           | 0.23      | 0.06       | 3.43E-02   | G                       | A                       | 0.577      | 7.55E-03 |
| rs1127648                                                                      | CSPG4                | a           | g           | 0.41      | -0.05      | 4.60E-02   | A                       | G                       | 0.118      | 0.00E+00 |
| rs2994953                                                                      | CTBS                 | a           | g           | 0.25      | -0.06      | 3.01E-02   | G                       | A                       | 0.560      | 4.92E-04 |
| rs15911                                                                        | CTBS                 | t           | c           | 0.22      | -0.07      | 3.32E-02   | C                       | T                       | 0.551      | 8.15E-03 |
| rs1050448                                                                      | EIF2B1               | a           | g           | 0.32      | 0.06       | 3.11E-02   | G                       | A                       | 0.549      | 3.95E-02 |
| rs597570                                                                       | FEZ1                 | a           | t           | 0.82      | -0.07      | 3.78E-02   | A                       | T                       | 0.634      | 4.79E-02 |
| rs4605                                                                         | FMOD                 | c           | g           | 0.46      | -0.09      | 5.68E-03   | G                       | C                       | 0.936      | 0.00E+00 |
| rs7208                                                                         | FMOD                 | a           | g           | 0.20      | -0.08      | 3.14E-02   | G                       | A                       | 0.964      | 0.00E+00 |
| rs2488                                                                         | FSTL1                | t           | c           | 0.50      | -0.06      | 1.31E-02   | C                       | T                       | 0.479      | 2.00E-05 |
| rs1056928                                                                      | FSTL1                | a           | g           | 0.50      | -0.06      | 1.52E-02   | G                       | A                       | 0.523      | 2.01E-02 |
| rs2897                                                                         | H2AFV                | a           | g           | 0.17      | 0.08       | 2.03E-02   | A                       | G                       | 0.581      | 7.24E-06 |
| rs1064767                                                                      | HDLBP                | t           | c           | 0.80      | -0.08      | 7.91E-03   | T                       | C                       | 0.438      | 1.27E-02 |
| rs15129                                                                        | HDLBP                | t           | c           | 0.80      | -0.08      | 9.70E-03   | T                       | C                       | 0.463      | 3.27E-06 |
| rs1054627                                                                      | IBSP                 | a           | g           | 0.31      | 0.06       | 1.75E-02   | G                       | A                       | 0.426      | 1.43E-13 |
| rs1054629                                                                      | IBSP                 | a           | t           | 0.69      | -0.06      | 1.90E-02   | A                       | T                       | 0.411      | 0.00E+00 |
| rs8513                                                                         | LRRC15               | t           | c           | 0.28      | 0.06       | 3.44E-02   | C                       | T                       | 0.526      | 3.41E-02 |
| rs1058840                                                                      | LTBP1                | a           | g           | 0.69      | -0.07      | 8.98E-03   | G                       | A                       | 0.580      | 6.24E-04 |
| rs12354                                                                        | LTBR                 | t           | g           | 0.30      | 0.06       | 4.38E-02   | T                       | G                       | 0.434      | 9.55E-04 |
| rs3087678                                                                      | MIR100HG             | a           | g           | 0.22      | -0.07      | 1.51E-02   | G                       | A                       | 0.453      | 2.99E-02 |
| rs17598561                                                                     | NMB                  | t           | c           | 0.06      | -0.13      | 1.25E-02   | C                       | T                       | 0.412      | 3.41E-02 |
| rs1044268                                                                      | NRP1                 | t           | c           | 0.12      | -0.12      | 1.30E-03   | C                       | T                       | 0.611      | 4.94E-02 |
| rs7772                                                                         | PCOLCE2              | c           | g           | 0.79      | -0.08      | 9.66E-03   | C                       | G                       | 0.506      | 2.12E-02 |
| rs1050382                                                                      | PECAM1               | a           | g           | 0.55      | 0.06       | 2.64E-02   | G                       | A                       | 0.614      | 3.66E-02 |
| rs6558405                                                                      | PLEC                 | t           | c           | 0.58      | -0.08      | 2.50E-03   | T                       | C                       | 0.465      | 2.16E-02 |
| rs7819099                                                                      | PLEC                 | a           | g           | 0.59      | -0.07      | 4.97E-03   | A                       | G                       | 0.437      | 1.77E-03 |
| rs6558406                                                                      | PLEC                 | t           | c           | 0.56      | -0.06      | 1.12E-02   | T                       | C                       | 0.448      | 6.54E-03 |
| rs6710                                                                         | PLOD2                | t           | c           | 0.51      | 0.07       | 2.52E-03   | T                       | C                       | 0.481      | 1.71E-02 |
| rs12261209                                                                     | PPP1R3C              | t           | c           | 0.08      | -0.12      | 6.53E-03   | C                       | T                       | 0.446      | 1.48E-05 |
| rs2023953                                                                      | RBM6                 | a           | g           | 0.11      | 0.15       | 1.53E-02   | G                       | A                       | 0.588      | 5.23E-04 |
| rs3133187                                                                      | RPS3                 | a           | g           | 0.95      | -0.18      | 1.05E-03   | A                       | G                       | 0.416      | 4.97E-09 |
| rs6647                                                                         | SERPINA1             | a           | g           | 0.76      | 0.06       | 3.88E-02   | A                       | G                       | 0.410      | 0.00E+00 |
| rs1061280                                                                      | SMO                  | a           | g           | 0.87      | -0.11      | 3.31E-03   | A                       | G                       | 0.541      | 2.88E-03 |
| rs9607                                                                         | SMO                  | a           | g           | 0.16      | 0.09       | 7.36E-03   | A                       | G                       | 0.466      | 2.58E-02 |
| rs3163                                                                         | TKT                  | t           | c           | 0.19      | -0.08      | 1.10E-02   | C                       | T                       | 0.563      | 4.29E-03 |
| rs1051485                                                                      | TKT                  | t           | c           | 0.81      | 0.08       | 1.13E-02   | T                       | C                       | 0.575      | 2.35E-02 |
| rs7619507                                                                      | TMEM45A              | t           | c           | 0.51      | 0.05       | 4.27E-02   | T                       | C                       | 0.405      | 3.20E-02 |
| rs12347433                                                                     | TNC                  | t           | c           | 0.72      | 0.06       | 2.56E-02   | T                       | C                       | 0.516      | 9.77E-06 |
| rs16927166                                                                     | TNNT3                | t           | c           | 0.99      | -0.46      | 3.93E-02   | T                       | C                       | 0.607      | 1.17E-02 |

| SNP       | whole Gene Symbol AI | Allele1 hip | Allele2 hip | Freq1 hip | Effect hip | Pvalue hip | Observed Ref Alleles AI | Observed Alt Alleles AI | metaPhi AI | FDR AI   |
|-----------|----------------------|-------------|-------------|-----------|------------|------------|-------------------------|-------------------------|------------|----------|
| rs6554    | UBA52                | t           | g           | 0.61      | 0.05       | 4.16E-02   | G                       | T                       | 0.428      | 0.00E+00 |
| rs3025000 | VEGFA                | t           | c           | 0.33      | -0.07      | 5.60E-03   | C                       | T                       | 0.592      | 4.58E-06 |
| rs7237    | WDR73                | t           | c           | 0.27      | 0.06       | 3.57E-02   | C                       | T                       | 0.651      | 2.61E-02 |
| rs2270844 | WWP2                 | t           | c           | 0.05      | -0.12      | 4.52E-02   | C                       | T                       | 0.560      | 1.43E-02 |
| rs11436   | ZCCHC17              | t           | c           | 0.40      | -0.06      | 1.96E-02   | T                       | C                       | 0.552      | 3.48E-02 |
| rs4664    | ZNF83                | a           | t           | 0.21      | 0.08       | 1.51E-02   | T                       | A                       | 0.555      | 2.63E-04 |
