# Supplementary material for: Annotating Transcriptional Effects of Genetic Variants in Disease‐Relevant Tissue: Transcriptome‐Wide Allelic Imbalance in Osteoarthritic Cartilage
Source: PubMed Central journal article supplement — Arthritis Rheumatol. 2019 Feb 23;71(4):561–70. doi: 10.1002/art.40748 (PMC6593438; doi:10.1002/art.40748), 2019-02-23
Supplement: ART-71-561-s011.pdf [file ART-71-561-s011.pdf]

**Supplementary Table-S10:** Allelic imbalance events of OA susceptibility SNPs in articular cartilage of OA patients

| Study  | OA type    | risk SNP               | EA     | EAF          | Risk gene                                    | SNPs_EA<br>Risk - AI                                                                 | LD with<br>risk SNP<br>R <sup>2</sup> | Alt<br>Allele<br>AI | Meta<br>Phi AI       | Pval                    | AI Ref<br>Allele<br>AI | Direction effect OA risk allele                                                                                          |
|--------|------------|------------------------|--------|--------------|----------------------------------------------|--------------------------------------------------------------------------------------|---------------------------------------|---------------------|----------------------|-------------------------|------------------------|--------------------------------------------------------------------------------------------------------------------------|
| [1]    | Hip & Knee | rs12901499             | G      | 0.57         | <i>SMAD3</i>                                 | rs12901499_G - rs8031440_G<br>rs8031440_G - rs3743342_C<br>rs8031440_G - rs3743343_T | 0.01<br>1.00<br>0.11                  | T<br>C              | 0.57<br>0.58         | 0.170<br>0.010          | C<br>T                 | AI observed but not related to risk SNP. Results identical to Raine et al. [2]                                           |
| [3, 4] | Hip        | rs143383 =<br>rs143384 | T      | 0.74         | <i>GDF5</i>                                  | rs143383_T - rs143384_A                                                              | 0.82                                  | G                   | 0.50                 | 0.950                   | A                      | No AI with risk allele. In contrast to paper Reynard et al. [5]                                                          |
| [6]    | Hip        | rs288326<br>rs7775     | T<br>C | 0.08<br>0.11 | <i>FRZB</i>                                  | rs288326_T - rs288326_T<br>rs7775_C                                                  | NA<br>NA                              | T<br>C              | 0.50<br>0.48         | 0.220<br>0.000          | C<br>G                 | No AI detected with risk allele<br>AI detected, FRZB lower is risk. Different to Snelling et al. [7]                     |
| [8]    | Hip        | rs225014               | C      | 0.34         | <i>DIO2</i>                                  | rs225014_C                                                                           | NA                                    | C                   | 0.50                 | 0.970                   | T                      | No AI detected with risk allele. In contrast to paper Bos et al.[9]                                                      |
| [10]   | Hip        | rs2615977              | C      | 0.22         | <i>COL11A1</i>                               | rs2615977_C - rs1031820_A                                                            | 0.16                                  | A                   | 0.48                 | 0.004                   | G                      | Possible AI detected, lower COL11A1 with risk allele, see also Raine et al. [11]                                         |
| [12]   | LDG        | rs1676486              | T      | 0.3          |                                              | rs1676486_T<br>rs1676486_T - rs2229783_T                                             | NA<br>0.32                            | C<br>G              | 0.51<br>0.53         | 0.202<br>0.000          | T<br>A                 | AI detected, lower COL11A1 with risk allele similar to results Mio et al.[12] & Raine et al.[11]                         |
| [13]   | Hip        | rs4836732              | C      | 0.47         | <i>ASTN2</i><br><i>PAPPA</i>                 | ND<br>ND                                                                             |                                       |                     |                      |                         |                        |                                                                                                                          |
| [13]   | Hip & Knee | rs11177                | T      | 0.38         | <i>GNL3</i><br><i>SPCS1</i><br><i>GLT8D1</i> | rs11177_T - rs11177_T<br>rs11177_T - rs6617_G<br>rs11177_T - rs6976_T                | NA<br>0.94<br>1.00                    | T<br>G<br>T         | 0.47<br>0.51<br>0.50 | 0.290<br>0.330<br>0.990 | C<br>C<br>C            | No AI different to Gee et al. [14]<br>No AI different to Gee et al. [14]<br>No AI similar to Gee et al.[14]              |
| [13]   | Knee       | rs12107036             | G      | 0.52         | <i>TP63</i>                                  | rs12107036_G                                                                         | ND                                    |                     |                      |                         |                        |                                                                                                                          |
| [13]   | Knee       | rs10947262             | C      | 0.58         | <i>BTNL2</i>                                 | rs10947262_C                                                                         | ND                                    |                     |                      |                         |                        |                                                                                                                          |
| [13]   | Hip & Knee | rs2277831              | A      | 0.743        | <i>MICAL3</i>                                | rs2277831_A - rs7675_T                                                               | 0.03                                  | T                   | 0.56                 | 0.240                   | C                      | AI detected double heterozygotes with risk SNP. <i>MICAL3</i> low is risk based on eQTL. Similar to Ratnayake et al.[15] |

| Study                          | OA type    | risk SNP   | EA   | EAF          | Risk gene                                                 | SNPs_EA<br>Risk - AI        | LD with<br>risk SNP<br>R <sup>2</sup> | Alt<br>Allele<br>AI | Meta<br>Phi AI <sup>1</sup> | P AI   | Ref<br>Allele<br>AI                                                                                          | Direction effect OA risk allele                                                                                      |
|--------------------------------|------------|------------|------|--------------|-----------------------------------------------------------|-----------------------------|---------------------------------------|---------------------|-----------------------------|--------|--------------------------------------------------------------------------------------------------------------|----------------------------------------------------------------------------------------------------------------------|
| [13]                           | Knee       | rs11280    | G    | 0.285        | <i>C6ORF130</i><br><i>OARD1</i>                           | rs11280_G - rs11280_G       | NA                                    | G                   | 0.48                        | 0.550  | A                                                                                                            | No AI                                                                                                                |
| [13]                           | Hip        | rs9350591  | T    | 0.11         | <i>SENP6</i>                                              | rs9350591_T - rs17414687_A  | 0.07                                  | A                   | 0.50                        | 0.970  | G                                                                                                            | Some AI not specifically among double heterozygotes                                                                  |
| <i>COL12A1</i>                 |            |            |      |              | rs9350591_T - rs970547_T<br>rs9350591_T - rs240736        | 0.01<br>0.03                | T<br>G                                | 0.53<br>0.48        | 0.001<br>0.607              | C<br>A | AI detected not related to risk allele                                                                       |                                                                                                                      |
| <i>MYO6</i>                    |            |            |      |              | rs9350591_T - rs699186_T                                  | 0.06                        | C                                     | 0.45                | 0.180                       | T      | AI detected not related to risk allele                                                                       |                                                                                                                      |
| <i>TMEM30A</i>                 |            |            |      |              | rs9350591_T - rs41269315_G                                | 0.20                        | A                                     | 0.53                | 0.110                       | G      | Suggestive evidence for AI, <i>TMEM30A</i> low is risk                                                       |                                                                                                                      |
| <i>FILIP1</i><br><i>COX7A2</i> |            |            |      |              | ND<br>ND                                                  |                             |                                       |                     |                             |        |                                                                                                              |                                                                                                                      |
| [13]                           | Hip & Knee | rs8044769  | C    | 0.5          | <i>FTO</i>                                                | rs8044769_C - rs708277_A    | 0.01                                  | A                   | 0.57                        | 0.060  | G                                                                                                            | AI particularly in double heterozygotes rs8044769 & rs708277. <i>FTO</i> high is risk (eQTL)                         |
| [16]                           | mJSW Hip   | rs10492367 | T    | 0.19         | <i>KLHDC5</i><br><i>HLKL42</i><br><i>PTHLH</i>            | rs10492367_T - rs9029_G     | 0.01                                  | G                   | 0.53                        | 0.460  | C                                                                                                            | No AI detected                                                                                                       |
| [16]                           | mJSW       | rs10948172 | G    | 0.29         | <i>SUPT3H</i>                                             | ND                          |                                       |                     |                             |        |                                                                                                              |                                                                                                                      |
| T                              |            |            | 0.67 | <i>CDC5L</i> | rs10948172_G - rs11572055_G<br>rs10948172_G - rs2273666_A | 0.02<br>0.01                | G<br>A                                | 0.45<br>0.37        | 0.418<br>0.049              | A<br>T | Some AI detected (low metaPhi) not related to risk allele                                                    |                                                                                                                      |
| A                              |            |            | 0.07 | <i>RUNX2</i> | rs12206662_A - rs62400377_G                               | 0.01                        | G                                     | 0.47                | 0.170                       | A      | Some allelic imbalance measured (low metaPhi), not related to risk allele as checked by double heterozygotes |                                                                                                                      |
| [16]                           | mJSW       | rs10471753 | C    | 0.61         | <i>PIK3R1</i>                                             | rs10471753_C - rs66666989_T | 0.01                                  |                     |                             |        |                                                                                                              | AI detected for rs66666989 in <i>PIK3R1</i> possibly related to risk allele. Majority of double heterozygous show AI |
| rs66666989_T - rs9291928_C     |            |            |      |              |                                                           | 0.71                        | T                                     | 0.56                | 0.001                       | C      |                                                                                                              |                                                                                                                      |
| rs10471753_C - rs3756668_A     |            |            |      |              |                                                           | 0.02                        | A                                     | 0.53                | 0.321                       | G      |                                                                                                              |                                                                                                                      |
| rs10471753_C - rs1043526_G     |            |            |      |              |                                                           | 0.16                        | G                                     | 0.36                | 0.000                       | A      |                                                                                                              |                                                                                                                      |
| [16]                           | mJSW (hip) | rs2862851  | T    | 0.49         | <i>TGFA</i>                                               | ND                          |                                       |                     |                             |        |                                                                                                              | Risk allele <i>TGFA</i> lower expression based on eQTL.                                                              |

| Study    | OA type        | risk SNP   | EA | EAF  | Risk gene                      | SNPs_EA<br>Risk - AI                                                         | LD with<br>risk SNP<br>R <sup>2</sup> | Alt<br>Allele<br>AI | Meta<br>Phi AI       | P AI                    | Ref<br>Allele<br>AI | Direction effect OA risk allele                                                                   |
|----------|----------------|------------|----|------|--------------------------------|------------------------------------------------------------------------------|---------------------------------------|---------------------|----------------------|-------------------------|---------------------|---------------------------------------------------------------------------------------------------|
| [16, 17] | Hip<br>mJSW    | rs12982744 | C  | 0.38 | <i>DOTIL</i>                   | ND                                                                           |                                       |                     |                      |                         |                     |                                                                                                   |
| [10, 16] | Hip,<br>mJSW   | rs835487   | G  | 0.34 | <i>CHST11</i>                  | rs835487_G - rs7847_T                                                        | 0.01                                  | T                   | 0.50                 | 0.880                   | C                   | No AI detected also not among double heterozygotes (N=2)                                          |
|          |                | rs11842874 | A  | 0.93 | <i>MCF2L</i>                   | ND                                                                           |                                       |                     |                      |                         |                     |                                                                                                   |
| [16, 18] | Hip            | rs788748   | A  | 0.49 | <i>IGFBP3</i>                  | rs788748_A - rs6670_A<br>rs6670_A - rs10241749_A<br>rs6670_A - rs1027438     | 0.01<br>0.33<br>0.38                  | A                   | 0.62                 | 0.000                   | T                   | AI particularly in double heterozygotes rs788748 & rs6670. Lower expression is risk based on eQTL |
| [19]     | Knee &<br>Hand | rs3815148  | G  | 0.23 | <i>BCAP29</i>                  | rs3815148_G - rs2807_A<br>rs3815148_G - rs2808_G<br>rs3815148_G - rs68170813 | 0.08<br>0.11<br>0.49                  | A<br>G<br>C         | 0.56<br>0.53<br>0.54 | 0.008<br>0.547<br>0.523 | G<br>A<br>T         | AI detected for rs2807 not related to risk allele                                                 |
|          |                |            |    |      | <i>GRP22</i>                   | ND                                                                           |                                       |                     |                      |                         |                     |                                                                                                   |
|          |                |            |    |      | <i>COG5</i>                    | ND                                                                           |                                       |                     |                      |                         |                     |                                                                                                   |
|          |                |            |    |      | <i>HBP1</i>                    | rs3815148_G - rs7794598_T                                                    | ND                                    | T                   | 0.51                 | 0.840                   | C                   | No AI detected. Different to Raine et al. [20]                                                    |
|          |                | rs4730250  | G  | 0.17 | <i>PRKAR2B</i><br><i>DUS4L</i> | ND<br>ND                                                                     |                                       |                     |                      |                         |                     |                                                                                                   |
| [21, 22] | sCOMP,<br>Hip  | rs10038    | A  | 0.33 | <i>COMP</i>                    | rs10038_A - rs4808155_G<br>rs10038_A - rs12327738_A                          | 0.07<br>0.97                          | G<br>A              | 0.38<br>0.50         | 0.000<br>0.695          | A<br>G              | AI detected, not correlated with risk allele<br>No AI detected with risk allele                   |
| [22]     | Hip            | rs6094710  | A  | 0.04 | <i>NCOA3</i>                   | ND                                                                           |                                       |                     |                      |                         |                     |                                                                                                   |
| [22]     | Hip            | rs5009270  | A  | 0.3  | <i>IFRD1</i>                   | rs5009270_A - rs2074796_A<br>rs5009270_A - rs225396_G                        | 0.26<br>0.28                          | A<br>G              | 0.47<br>0.52         | 0.461<br>0.690          | G<br>T              | No AI detected with risk allele                                                                   |
| [22]     | Hip            | rs3757837  | C  | 0.06 | <i>CAMK2B</i>                  | ND                                                                           |                                       |                     |                      |                         |                     |                                                                                                   |
| [23]     | Hand           | rs3204689  | C  | 0.45 | <i>ALDH1A2</i>                 | rs3204689_C                                                                  |                                       | C                   | 0.42                 | 0.000                   | G                   | AI detected similar to Stykarsdottir et al.[23]                                                   |
| [24]     | Hand           | rs4764133  | T  | 0.39 | <i>MGP</i>                     | rs4764133_T - rs1800801_T                                                    | 0.99                                  | T                   | 0.41                 | 0.000                   | C                   | AI detected identical to den Hollander et al.[24]                                                 |

<sup>1</sup>Phi expresses allele counts of the alternative allele relative to total allele counts (alternative + reference). ND = not determined, NS = not significant, NA = Not applicable

## REFERENCES

1. Valdes AM, Spector TD, Tamm A et al. Genetic variation in the SMAD3 gene is associated with hip and knee osteoarthritis. *Arthritis Rheum* 2010; 62: 2347-2352.
2. Raine EV, Reynard LN, van de Laar IM et al. Identification and analysis of a SMAD3 cis-acting eQTL operating in primary osteoarthritis and in the aneurysms and osteoarthritis syndrome. *Osteoarthritis. Cartilage* 2014; 22(5): 698-705.
3. Evangelou E, Chapman K, Meulenbelt I et al. Large-scale analysis of association between GDF5 and FRZB variants and osteoarthritis of the hip, knee, and hand. *Arthritis Rheum* 2009; 60(6): 1710-1721.
4. Miyamoto Y, Mabuchi A, Shi D et al. A functional polymorphism in the 5' UTR of GDF5 is associated with susceptibility to osteoarthritis. *Nat. Genet* 2007; 39: 529-533.
5. Reynard LN, Bui C, Syddall CM, Loughlin J. CpG methylation regulates allelic expression of GDF5 by modulating binding of SP1 and SP3 repressor proteins to the osteoarthritis susceptibility SNP rs143383. *Hum. Genet* 2014; 133(8): 1059-1073.
6. Loughlin J, Dowling B, Chapman K et al. Functional variants within the secreted frizzled-related protein 3 gene are associated with hip osteoarthritis in females. *Proc. Natl. Acad. Sci. U. S. A* 2004; 101: 9757-9762.
7. Snelling S, Ferreira A, Loughlin J. Allelic expression analysis suggests that cis-acting polymorphism of FRZB expression does not contribute to osteoarthritis susceptibility. *Osteoarthritis. Cartilage* 2007; 15: 90-92.
8. Meulenbelt I, Min JL, Bos S et al. Identification of DIO2 as a new susceptibility locus for symptomatic osteoarthritis. *Hum. Mol. Genet* 2008; 17(12): 1867-1875.
9. Bos SD, Bovee JV, Duijnisveld BJ et al. Increased type II deiodinase protein in OA-affected cartilage and allelic imbalance of OA risk polymorphism rs225014 at DIO2 in human OA joint tissues. *Ann. Rheum. Dis* 2012; 71(7): 1254-1258.
10. Panoutsopoulou K, Southam L, Elliott KS et al. Insights into the genetic architecture of osteoarthritis from stage 1 of the arcOGEN study. *Ann. Rheum. Dis* 2011; 70(5): 864-867.
11. Raine EV, Dodd AW, Reynard LN, Loughlin J. Allelic expression analysis of the osteoarthritis susceptibility gene COL11A1 in human joint tissues. *BMC. Musculoskelet. Disord* 2013; 14: 85.
12. Mio F, Chiba K, Hirose Y et al. A Functional Polymorphism in COL11A1, Which Encodes the  $\hat{I}\pm 1$  Chain of Type XI Collagen, Is Associated with Susceptibility to Lumbar Disc Herniation. *Am. J. Hum. Genet* 2007; 81: 1271-1277.
13. Zeggini E, Panoutsopoulou K, Southam L et al. Identification of new susceptibility loci for osteoarthritis (arcOGEN): a genome-wide association study. *Lancet* 2012; 380(9844): 815-823.
14. Gee F, Clubbs CF, Raine EV et al. Allelic expression analysis of the osteoarthritis susceptibility locus that maps to chromosome 3p21 reveals cis-acting eQTLs at GNL3 and SPCS1. *BMC Med Genet* 2014; 15: 53.
15. Ratnayake M, Reynard LN, Raine EV et al. Allelic expression analysis of the osteoarthritis susceptibility locus that maps to MICAL3. *BMC. Med. Genet* 2012; 13: 12.
16. Castano-Betancourt MC, Evans DS, Ramos YF et al. Novel Genetic Variants for Cartilage Thickness and Hip Osteoarthritis. *PLoS Genet* 2016; 12: e1006260.

17. Evangelou E, Valdes AM, Castano-Betancourt MC et al. The DOT1L rs12982744 polymorphism is associated with osteoarthritis of the hip with genome-wide statistical significance in males. *Ann. Rheum. Dis* 2013; 72(7): 1264-1265.
18. Evans DS, Cailotto F, Parimi N et al. Genome-wide association and functional studies identify a role for IGFBP3 in hip osteoarthritis. *Ann Rheum Dis* 2015; 74: 1861-1867.
19. Kerkhof HJ, Lories RJ, Meulenbelt I et al. A genome-wide association study identifies an osteoarthritis susceptibility locus on chromosome 7q22. *Arthritis Rheum* 2010; 62(2): 499-510.
20. Raine EV, Wreglesworth N, Dodd AW et al. Gene expression analysis reveals HBP1 as a key target for the osteoarthritis susceptibility locus that maps to chromosome 7q22. *Ann. Rheum. Dis* 2012; 71: 2020-2027.
21. Ramos YF, Metrustry S, Arden N et al. Meta-analysis identifies loci affecting levels of the potential osteoarthritis biomarkers sCOMP and uCTX-II with genome wide significance. *J Med Genet* 2014; 51: 596-604.
22. Evangelou E, Kerkhof HJ, Styrkarsdottir U et al. A meta-analysis of genome-wide association studies identifies novel variants associated with osteoarthritis of the hip. *Ann. Rheum. Dis* 2014; 73(12): 2130-2136.
23. Styrkarsdottir U, Thorleifsson G, Helgadottir HT et al. Severe osteoarthritis of the hand associates with common variants within the ALDH1A2 gene and with rare variants at 1p31. *Nat. Genet* 2014; 46(5): 498-502.
24. den Hollander W, Boer CG, Hart DJ et al. Genome-wide association and functional studies identify a role for matrix Gla protein in osteoarthritis of the hand. *Ann Rheum Dis* 2017; 76: 2046-2053.
